# Supplementary material for: Influence of current climate, historical climate stability and topography on species richness and endemism in Mesoamerican geophyte plants
Source: PeerJ journal article supplement (doi:10.7717/peerj.3932), 2017-10-20

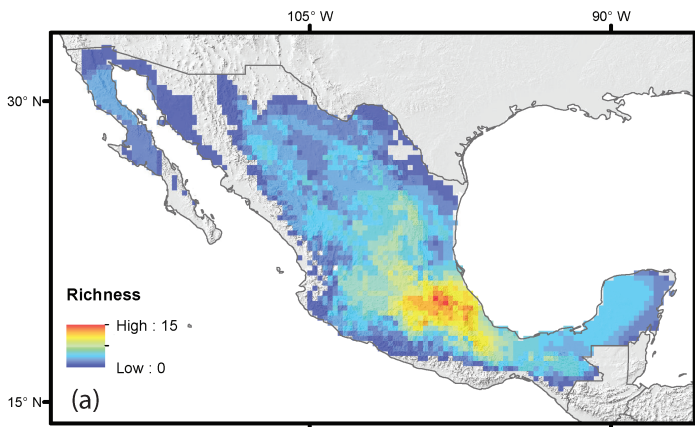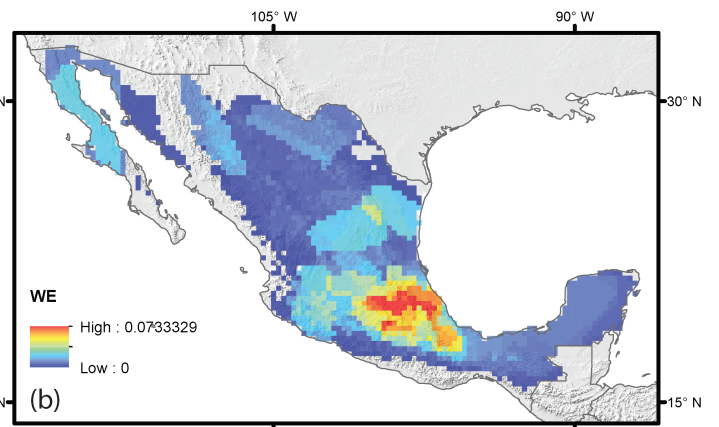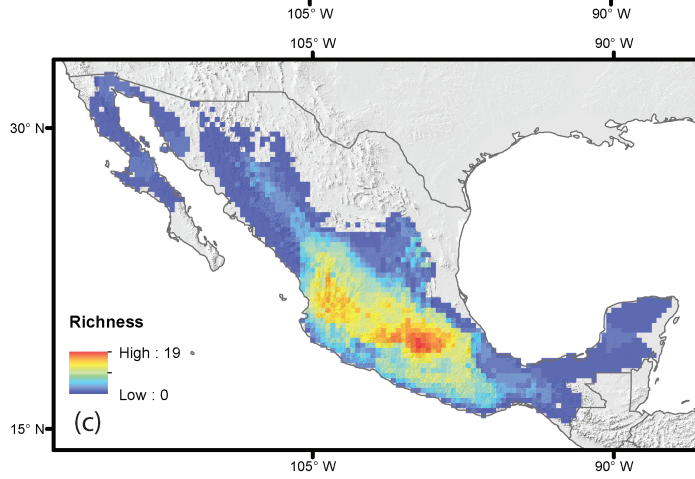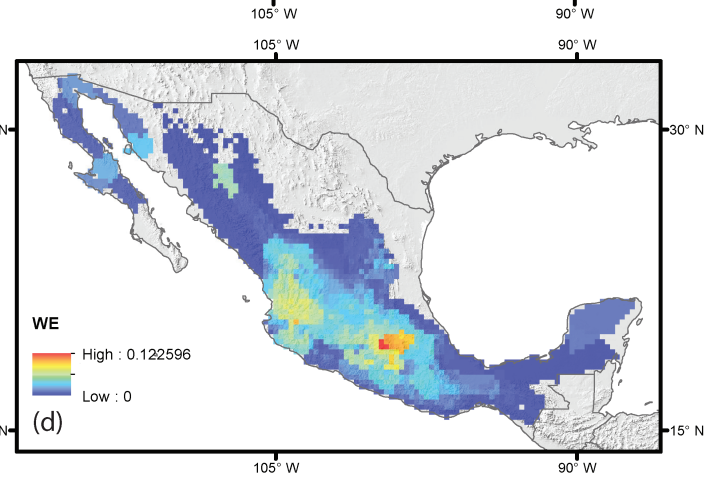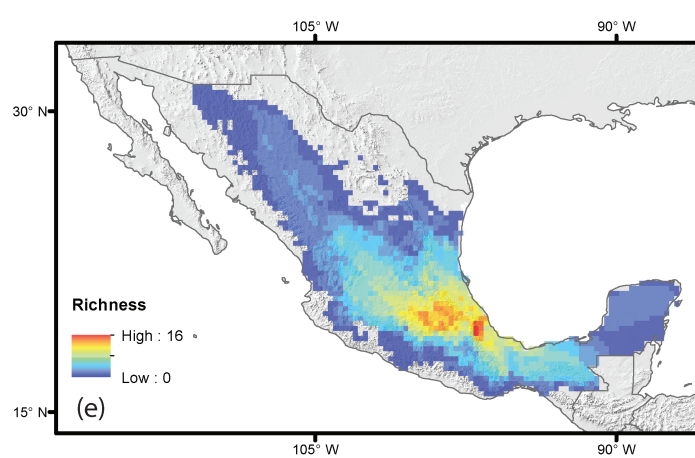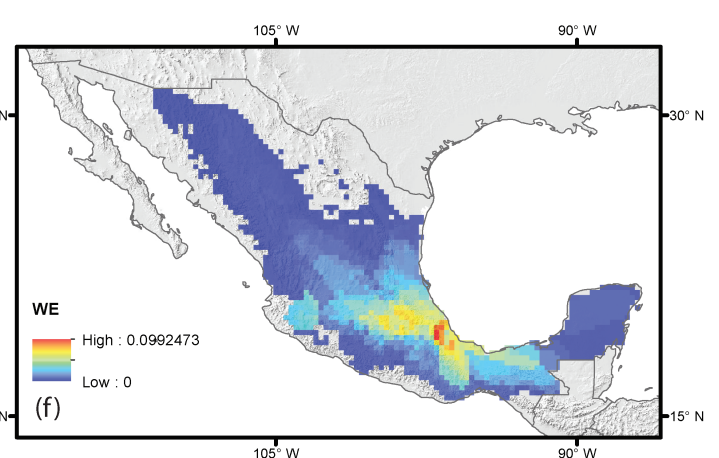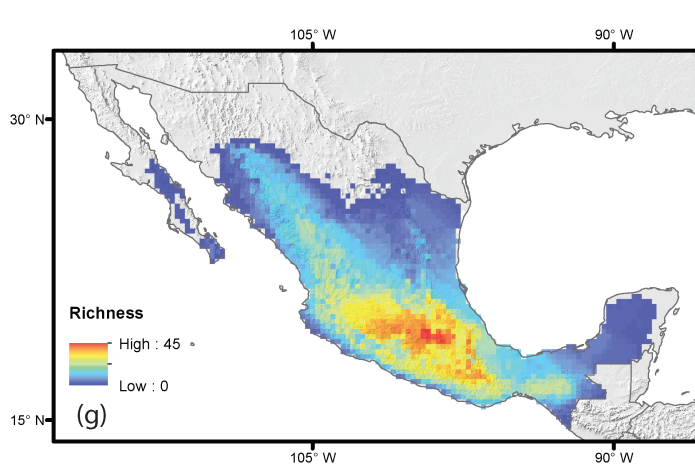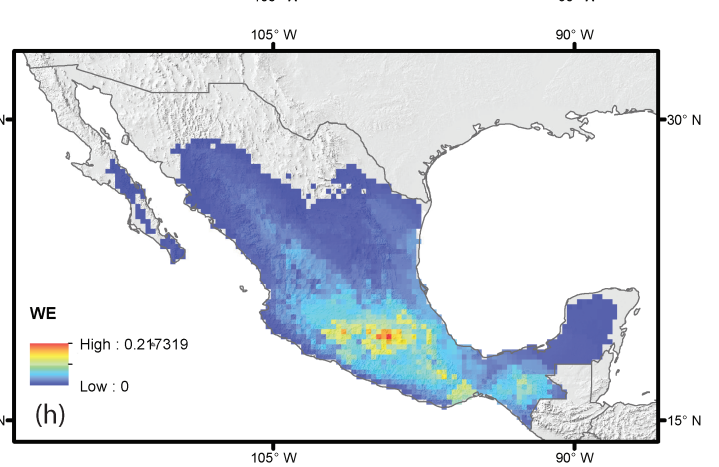

Supplement: Figure_S1Final.pdf [file Figure_S1Final.pdf]
