# Supplementary material for: Influence of current climate, historical climate stability and topography on species richness and endemism in Mesoamerican geophyte plants
Source: PubMed Central journal article supplement (PMC5652257; doi:10.7717/peerj.3932), 2017-10-20
Supplement: peerj-05-3932-s003.pdf [file peerj-05-3932-s003.pdf]

**Table S2.** Occurrence data and list of species used for species distribution modeling (SDM).

| Species                          | spatially unique occurrence points |
|----------------------------------|------------------------------------|
| <i>Allium eurotophilum</i>       | 5                                  |
| <i>Allium glandulosum</i>        | 87                                 |
| <i>Allium haematochiton</i>      | 8                                  |
| <i>Alophia drummondii</i>        | 7                                  |
| <i>Arisaema macrospathum</i>     | 12                                 |
| <i>Beloglottis costaricensis</i> | 7                                  |
| <i>Bessera elegans</i>           | 15                                 |
| <i>Bletia adenocarpa</i>         | 21                                 |
| <i>Bletia campanulata</i>        | 55                                 |
| <i>Bletia coccinea</i>           | 21                                 |
| <i>Bletia ensifolia</i>          | 17                                 |
| <i>Bletia gracilis</i>           | 29                                 |
| <i>Bletia lilacina</i>           | 8                                  |
| <i>Bletia macristhmochila</i>    | 29                                 |
| <i>Bletia neglecta</i>           | 26                                 |
| <i>Bletia parkinsonii</i>        | 22                                 |
| <i>Bletia punctata</i>           | 20                                 |
| <i>Bletia purpurata</i>          | 34                                 |
| <i>Bletia purpurea</i>           | 108                                |
| <i>Bletia roezlii</i>            | 38                                 |
| <i>Bletia tenuifolia</i>         | 6                                  |
| <i>Brachystele polyantha</i>     | 8                                  |
| <i>Calochortus barbatus</i>      | 18                                 |
| <i>Calochortus exilis</i>        | 5                                  |
| <i>Calochortus fuscus</i>        | 7                                  |
| <i>Calochortus purpureus</i>     | 7                                  |
| <i>Calochortus spatulatus</i>    | 8                                  |
| <i>Calochortus venustulus</i>    | 6                                  |
| <i>Cardiostigma longispatha</i>  | 8                                  |
| <i>Cipura campanulata</i>        | 7                                  |
| <i>Cipura paludosa</i>           | 15                                 |
| <i>Corallorhiza bulbosa</i>      | 5                                  |
| <i>Crinum americanum</i>         | 7                                  |
| <i>Cypripedium irapeanum</i>     | 11                                 |
| <i>Cypripedium molle</i>         | 9                                  |
| <i>Deiregyne densiflora</i>      | 8                                  |

|                                   |    |
|-----------------------------------|----|
| <i>Dichromanthus cinnabarinus</i> | 15 |
| <i>Dichromanthus michuacanus</i>  | 14 |
| <i>Echeandia echeandioides</i>    | 9  |
| <i>Echeandia flavescens</i>       | 11 |
| <i>Echeandia flexuosa</i>         | 9  |
| <i>Echeandia longipedicellata</i> | 5  |
| <i>Echeandia luteola</i>          | 6  |
| <i>Echeandia mexicana</i>         | 16 |
| <i>Echeandia nana</i>             | 7  |
| <i>Echeandia occidentalis</i>     | 10 |
| <i>Echeandia paniculata</i>       | 9  |
| <i>Echeandia parviflora</i>       | 12 |
| <i>Echeandia ramosissima</i>      | 9  |
| <i>Echeandia reflexa</i>          | 5  |
| <i>Echeandia scabrella</i>        | 6  |
| <i>Echeandia skinneri</i>         | 18 |
| <i>Echeandia vestita</i>          | 17 |
| <i>Eleutherine bulbosa</i>        | 5  |
| <i>Eleutherine latifolia</i>      | 7  |
| <i>Govenia alba</i>               | 6  |
| <i>Govenia liliacea</i>           | 14 |
| <i>Govenia mutica</i>             | 6  |
| <i>Govenia purpusii</i>           | 7  |
| <i>Govenia superba</i>            | 12 |
| <i>Habenaria clypeata</i>         | 20 |
| <i>Habenaria novemfida</i>        | 9  |
| <i>Habenaria strictissima</i>     | 5  |
| <i>Habranthus longifolius</i>     | 5  |
| <i>Hexalectris grandiflora</i>    | 10 |
| <i>Hymenocallis acutifolia</i>    | 5  |
| <i>Hymenocallis harrisiana</i>    | 5  |
| <i>Hymenocallis littoralis</i>    | 10 |
| <i>Hypoxis colliculata</i>        | 5  |
| <i>Hypoxis potosina</i>           | 6  |
| <i>Hypoxys decumbens</i>          | 26 |
| <i>Hypoxys mexicana</i>           | 22 |
| <i>Liparis vexillifera</i>        | 13 |

|                                |     |
|--------------------------------|-----|
| <i>Malaxis carnosa</i>         | 8   |
| <i>Malaxis myurus</i>          | 11  |
| <i>Maranta gibba</i>           | 7   |
| <i>Milla biflora</i>           | 175 |
| <i>Nemastylis tenuis</i>       | 53  |
| <i>Nothoscordum bivalve</i>    | 26  |
| <i>Nothoscordum gracile</i>    | 11  |
| <i>Orthrosanthus exsertus</i>  | 7   |
| <i>Polianthes geminiflora</i>  | 11  |
| <i>Polianthes longiflora</i>   | 10  |
| <i>Polianthes montana</i>      | 8   |
| <i>Polianthes palustris</i>    | 13  |
| <i>Polianthes platyphylla</i>  | 12  |
| <i>Polianthes pringlei</i>     | 5   |
| <i>Polianthes sessiliflora</i> | 7   |
| <i>Polianthes tuberosa</i>     | 9   |
| <i>Ponthieva mexicana</i>      | 8   |
| <i>Ponthieva schaffneri</i>    | 14  |
| <i>Sacoila lanceolata</i>      | 17  |
| <i>Sarcoglottis assurgens</i>  | 5   |
| <i>Sarcoglottis schaffneri</i> | 14  |
| <i>Schiedeella affinis</i>     | 6   |
| <i>Schiedeella eriophora</i>   | 10  |
| <i>Sotoa confusa</i>           | 5   |
| <i>Sprekelia formosissima</i>  | 26  |
| <i>Tigridia ehrenbergii</i>    | 5   |
| <i>Tigridia meleagris</i>      | 5   |
| <i>Tigridia multiflora</i>     | 12  |
| <i>Tigridia pavonia</i>        | 18  |
| <i>Trimezia steyermarkii</i>   | 5   |
| <i>Triphora gentianoides</i>   | 5   |
| <i>Weldenia candida</i>        | 7   |
| <i>Zephyranthes brevipes</i>   | 6   |
| <i>Zephyranthes carinata</i>   | 13  |
| <i>Zephyranthes lindleyana</i> | 7   |
| <i>Zephyranthes verecunda</i>  | 6   |
