# Supplementary material for: Influence of current climate, historical climate stability and topography on species richness and endemism in Mesoamerican geophyte plants
Source: PeerJ journal article supplement (doi:10.7717/peerj.3932), 2017-10-20
Supplement: TableS1.pdf [file TableS1.pdf]

**Table S1. List of studied species with their georeferences.**

| <b>Record numb</b> | <b>Family</b> | <b>Species</b>    | <b>lat.</b> |
|--------------------|---------------|-------------------|-------------|
| 1                  | Hypoxidaceae  | Hypoxys mexicana  | 26.7933333  |
| 2                  | Hypoxidaceae  | Hypoxys mexicana  | 19.1441667  |
| 3                  | Hypoxidaceae  | Hypoxys mexicana  | 18.2547222  |
| 4                  | Hypoxidaceae  | Hypoxys mexicana  | 19.5030556  |
| 5                  | Hypoxidaceae  | Hypoxys mexicana  | 19.3425     |
| 6                  | Hypoxidaceae  | Hypoxys mexicana  | 19.7680556  |
| 7                  | Hypoxidaceae  | Hypoxys mexicana  | 20.1297222  |
| 8                  | Hypoxidaceae  | Hypoxys mexicana  | 19.4180556  |
| 9                  | Hypoxidaceae  | Hypoxys mexicana  | 19.2022222  |
| 10                 | Hypoxidaceae  | Hypoxys mexicana  | 19.6447222  |
| 11                 | Hypoxidaceae  | Hypoxys mexicana  | 19.7211111  |
| 12                 | Hypoxidaceae  | Hypoxys mexicana  | 28.175      |
| 13                 | Hypoxidaceae  | Hypoxys mexicana  | 27.3166667  |
| 14                 | Hypoxidaceae  | Hypoxys mexicana  | 28.3083333  |
| 15                 | Hypoxidaceae  | Hypoxys mexicana  | 23.9786111  |
| 16                 | Hypoxidaceae  | Hypoxys mexicana  | 19.4216667  |
| 17                 | Hypoxidaceae  | Hypoxys mexicana  | 21.5166667  |
| 18                 | Hypoxidaceae  | Hypoxys mexicana  | 19.705      |
| 19                 | Hypoxidaceae  | Hypoxys mexicana  | 22.97       |
| 20                 | Hypoxidaceae  | Hypoxys mexicana  | 18.998952   |
| 21                 | Hypoxidaceae  | Hypoxys mexicana  | 21.7633333  |
| 22                 | Hypoxidaceae  | Hypoxys mexicana  | 23.2469444  |
| 23                 | Hypoxidaceae  | Hypoxys mexicana  | 21.5716667  |
| 24                 | Hypoxidaceae  | Hypoxis lucens    | 21.977705   |
| 25                 | Hypoxidaceae  | Hypoxis lucens    | 20.4275     |
| 26                 | Hypoxidaceae  | Hypoxis lucens    | 19.5113889  |
| 27                 | Hypoxidaceae  | Hypoxys decumbens | 21.9422222  |
| 28                 | Hypoxidaceae  | Hypoxys decumbens | 19.285535   |
| 29                 | Hypoxidaceae  | Hypoxys decumbens | 19.559529   |
| 30                 | Hypoxidaceae  | Hypoxys decumbens | 18.8497222  |
| 31                 | Hypoxidaceae  | Hypoxys decumbens | 19.536662   |
| 32                 | Hypoxidaceae  | Hypoxys decumbens | 19.637911   |
| 33                 | Hypoxidaceae  | Hypoxys decumbens | 19.0816667  |
| 34                 | Hypoxidaceae  | Hypoxys decumbens | 19.405247   |
| 35                 | Hypoxidaceae  | Hypoxys decumbens | 19.4775     |
| 36                 | Hypoxidaceae  | Hypoxys decumbens | 18.9608333  |
| 37                 | Hypoxidaceae  | Hypoxys decumbens | 18.9275     |
| 38                 | Hypoxidaceae  | Hypoxys decumbens | 19.025      |
| 39                 | Hypoxidaceae  | Hypoxys decumbens | 23.7791667  |
| 40                 | Hypoxidaceae  | Hypoxys decumbens | 21.2441667  |
| 41                 | Hypoxidaceae  | Hypoxys decumbens | 22.8841806  |
| 42                 | Hypoxidaceae  | Hypoxys decumbens | 21.8772194  |
| 43                 | Hypoxidaceae  | Hypoxys decumbens | 19.203979   |

|    |                |                     |            |
|----|----------------|---------------------|------------|
| 44 | Hypoxidaceae   | Hypoxys decumbens   | 21.0242611 |
| 45 | Hypoxidaceae   | Hypoxys decumbens   | 18.3129861 |
| 46 | Hypoxidaceae   | Hypoxys decumbens   | 17.2915444 |
| 47 | Hypoxidaceae   | Hypoxys decumbens   | 19.4333333 |
| 48 | Hypoxidaceae   | Hypoxys decumbens   | 23.9972222 |
| 49 | Hypoxidaceae   | Hypoxys decumbens   | 16.8336111 |
| 50 | Hypoxidaceae   | Hypoxys decumbens   | 24.1629556 |
| 51 | Hypoxidaceae   | Hypoxys decumbens   | 17.6941667 |
| 52 | Hypoxidaceae   | Hypoxis hirsuta     | 19.469748  |
| 53 | Hypoxidaceae   | Hypoxis fibrata     | 20.2916667 |
| 54 | Hypoxidaceae   | Hypoxys decumbens   | 17.5775    |
| 55 | Hypoxidaceae   | Hypoxis pulchella   | 24.0166667 |
| 56 | Hypoxidaceae   | Hypoxis pulchella   | 25.4429667 |
| 57 | Hypoxidaceae   | Hypoxis pulchella   | 25.2166667 |
| 58 | Hypoxidaceae   | Hypoxis tepicensis  | 19.0369389 |
| 59 | Hypoxidaceae   | Hypoxis wrightii    | 20.9622222 |
| 60 | Hypoxidaceae   | Hypoxis tepicensis  | 19.4333333 |
| 61 | Hypoxidaceae   | Hypoxis potosina    | 22.5       |
| 62 | Hypoxidaceae   | Hypoxis potosina    | 18.987     |
| 63 | Hypoxidaceae   | Hypoxis potosina    | 18.863     |
| 64 | Hypoxidaceae   | Hypoxis potosina    | 19.177     |
| 65 | Hypoxidaceae   | Hypoxis potosina    | 20.283     |
| 66 | Hypoxidaceae   | Hypoxis potosina    | 19.903     |
| 67 | Hypoxidaceae   | Hypoxis colliculata | 17.561656  |
| 68 | Hypoxidaceae   | Hypoxis colliculata | 16.710977  |
| 69 | Hypoxidaceae   | Hypoxis colliculata | 16.742662  |
| 70 | Hypoxidaceae   | Hypoxis colliculata | 16.505816  |
| 71 | Hypoxidaceae   | Hypoxis colliculata | 17.519412  |
| 72 | Hypoxidaceae   | Hypoxis colliculata | 17.537078  |
| 73 | Amaryllidaceae | Allium cernuum      | 29.0916056 |
| 74 | Amaryllidaceae | Allium cernuum      | 29.3504611 |
| 75 | Amaryllidaceae | Allium cernuum      | 29.05      |
| 76 | Amaryllidaceae | Allium cernuum      | 27.4325    |
| 77 | Amaryllidaceae | Allium drummondii   | 26.854748  |
| 78 | Amaryllidaceae | Allium drummondii   | 29.526831  |
| 79 | Amaryllidaceae | Allium durangoense  | 37.271412  |
| 80 | Amaryllidaceae | Allium eurotophilum | 30.916188  |
| 81 | Amaryllidaceae | Allium eurotophilum | 30.906649  |
| 82 | Amaryllidaceae | Allium eurotophilum | 30.999113  |
| 83 | Amaryllidaceae | Allium eurotophilum | 30.965805  |
| 84 | Amaryllidaceae | Allium eurotophilum | 31.4       |
| 85 | Amaryllidaceae | Allium eurotophilum | 31.05      |
| 86 | Amaryllidaceae | Allium eurotophilum | 26.9275    |
| 87 | Amaryllidaceae | Allium fantamosense | 22.232639  |
| 88 | Amaryllidaceae | Allium fimbriatum   | 32.4333333 |

|     |                |                    |            |
|-----|----------------|--------------------|------------|
| 89  | Amaryllidaceae | Allium fimbriatum  | 32.0333333 |
| 90  | Amaryllidaceae | Allium glandulosum | 22.0797222 |
| 91  | Amaryllidaceae | Allium glandulosum | 21.3283333 |
| 92  | Amaryllidaceae | Allium glandulosum | 20.2175    |
| 93  | Amaryllidaceae | Allium glandulosum | 19.7       |
| 94  | Amaryllidaceae | Allium glandulosum | 20.2841667 |
| 95  | Amaryllidaceae | Allium glandulosum | 16.7141667 |
| 96  | Amaryllidaceae | Allium glandulosum | 19.587289  |
| 97  | Amaryllidaceae | Allium glandulosum | 22.1547222 |
| 98  | Amaryllidaceae | Allium glandulosum | 19.5775    |
| 99  | Amaryllidaceae | Allium glandulosum | 22.0775    |
| 100 | Amaryllidaceae | Allium glandulosum | 18.515505  |
| 101 | Amaryllidaceae | Allium glandulosum | 20.420249  |
| 102 | Amaryllidaceae | Allium glandulosum | 19.713401  |
| 103 | Amaryllidaceae | Allium glandulosum | 18.8113889 |
| 104 | Amaryllidaceae | Allium glandulosum | 19.2775    |
| 105 | Amaryllidaceae | Allium glandulosum | 19.5966667 |
| 106 | Amaryllidaceae | Allium glandulosum | 19.5275    |
| 107 | Amaryllidaceae | Allium glandulosum | 19.6941667 |
| 108 | Amaryllidaceae | Allium glandulosum | 20.3441667 |
| 109 | Amaryllidaceae | Allium glandulosum | 19.7441667 |
| 110 | Amaryllidaceae | Allium glandulosum | 19.0941667 |
| 111 | Amaryllidaceae | Allium glandulosum | 19.3275    |
| 112 | Amaryllidaceae | Allium glandulosum | 18.9441667 |
| 113 | Amaryllidaceae | Allium glandulosum | 20.0441667 |
| 114 | Amaryllidaceae | Allium glandulosum | 20.9441667 |
| 115 | Amaryllidaceae | Allium glandulosum | 19.8441667 |
| 116 | Amaryllidaceae | Allium glandulosum | 20.7775    |
| 117 | Amaryllidaceae | Allium glandulosum | 15.1441667 |
| 118 | Amaryllidaceae | Allium glandulosum | 20.0991667 |
| 119 | Amaryllidaceae | Allium glandulosum | 19.7680556 |
| 120 | Amaryllidaceae | Allium glandulosum | 19.8730556 |
| 121 | Amaryllidaceae | Allium glandulosum | 19.8455556 |
| 122 | Amaryllidaceae | Allium glandulosum | 19.4455556 |
| 123 | Amaryllidaceae | Allium glandulosum | 19.3063889 |
| 124 | Amaryllidaceae | Allium glandulosum | 20.185     |
| 125 | Amaryllidaceae | Allium glandulosum | 19.2083333 |
| 126 | Amaryllidaceae | Allium glandulosum | 19.5519444 |
| 127 | Amaryllidaceae | Allium glandulosum | 19.32      |
| 128 | Amaryllidaceae | Allium glandulosum | 19.2013889 |
| 129 | Amaryllidaceae | Allium glandulosum | 19.5366667 |
| 130 | Amaryllidaceae | Allium glandulosum | 19.8425    |
| 131 | Amaryllidaceae | Allium glandulosum | 19.5052778 |
| 132 | Amaryllidaceae | Allium glandulosum | 19.37      |
| 133 | Amaryllidaceae | Allium glandulosum | 19.5719444 |

|     |                |                    |            |
|-----|----------------|--------------------|------------|
| 134 | Amaryllidaceae | Allium glandulosum | 19.3083333 |
| 135 | Amaryllidaceae | Allium glandulosum | 19.2252778 |
| 136 | Amaryllidaceae | Allium glandulosum | 19.6333333 |
| 137 | Amaryllidaceae | Allium glandulosum | 19.3425    |
| 138 | Amaryllidaceae | Allium glandulosum | 19.5322222 |
| 139 | Amaryllidaceae | Allium glandulosum | 19.3061111 |
| 140 | Amaryllidaceae | Allium glandulosum | 17.2261111 |
| 141 | Amaryllidaceae | Allium glandulosum | 23.2208333 |
| 142 | Amaryllidaceae | Allium glandulosum | 24.5166667 |
| 143 | Amaryllidaceae | Allium glandulosum | 30.05      |
| 144 | Amaryllidaceae | Allium glandulosum | 20.0998472 |
| 145 | Amaryllidaceae | Allium glandulosum | 22.1639    |
| 146 | Amaryllidaceae | Allium glandulosum | 20.3811389 |
| 147 | Amaryllidaceae | Allium glandulosum | 25.6711111 |
| 148 | Amaryllidaceae | Allium glandulosum | 23.9857472 |
| 149 | Amaryllidaceae | Allium glandulosum | 20.9294667 |
| 150 | Amaryllidaceae | Allium glandulosum | 25.5833333 |
| 151 | Amaryllidaceae | Allium glandulosum | 20.3716667 |
| 152 | Amaryllidaceae | Allium glandulosum | 28.5584306 |
| 153 | Amaryllidaceae | Allium glandulosum | 19.0819389 |
| 154 | Amaryllidaceae | Allium glandulosum | 19.2161111 |
| 155 | Amaryllidaceae | Allium glandulosum | 19.5719389 |
| 156 | Amaryllidaceae | Allium glandulosum | 20.3433333 |
| 157 | Amaryllidaceae | Allium glandulosum | 19.4047222 |
| 158 | Amaryllidaceae | Allium glandulosum | 18.1680556 |
| 159 | Amaryllidaceae | Allium glandulosum | 20.5083333 |
| 160 | Amaryllidaceae | Allium glandulosum | 20.1233333 |
| 161 | Amaryllidaceae | Allium glandulosum | 19.2166667 |
| 162 | Amaryllidaceae | Allium glandulosum | 24.4183333 |
| 163 | Amaryllidaceae | Allium glandulosum | 26.1133333 |
| 164 | Amaryllidaceae | Allium glandulosum | 19.9563889 |
| 165 | Amaryllidaceae | Allium glandulosum | 22.3533333 |
| 166 | Amaryllidaceae | Allium glandulosum | 19.9133333 |
| 167 | Amaryllidaceae | Allium glandulosum | 20.4166667 |
| 168 | Amaryllidaceae | Allium glandulosum | 19.3416667 |
| 169 | Amaryllidaceae | Allium glandulosum | 17.4616667 |
| 170 | Amaryllidaceae | Allium glandulosum | 20.5316667 |
| 171 | Amaryllidaceae | Allium glandulosum | 22.2513889 |
| 172 | Amaryllidaceae | Allium glandulosum | 18.85      |
| 173 | Amaryllidaceae | Allium glandulosum | 15.0625    |
| 174 | Amaryllidaceae | Allium glandulosum | 24.025     |
| 175 | Amaryllidaceae | Allium glandulosum | 17.2683333 |
| 176 | Amaryllidaceae | Allium glandulosum | 23.6316667 |
| 177 | Amaryllidaceae | Allium glandulosum | 29.1083333 |
| 178 | Amaryllidaceae | Allium glandulosum | 19.1075    |

|     |                |                      |            |
|-----|----------------|----------------------|------------|
| 179 | Amaryllidaceae | Allium glandulosum   | 19.53      |
| 180 | Amaryllidaceae | Allium glandulosum   | 20.1966667 |
| 181 | Amaryllidaceae | Allium glandulosum   | 22.1347222 |
| 182 | Amaryllidaceae | Allium glandulosum   | 19.4666667 |
| 183 | Amaryllidaceae | Allium glandulosum   | 20.3366667 |
| 184 | Amaryllidaceae | Allium glandulosum   | 21.05      |
| 185 | Amaryllidaceae | Allium glandulosum   | 19.5716667 |
| 186 | Amaryllidaceae | Allium glandulosum   | 21.2986111 |
| 187 | Amaryllidaceae | Allium glandulosum   | 21.015     |
| 188 | Amaryllidaceae | Allium glandulosum   | 21.3683333 |
| 189 | Amaryllidaceae | Allium glandulosum   | 28.4030556 |
| 190 | Amaryllidaceae | Allium glandulosum   | 17.4333333 |
| 191 | Amaryllidaceae | Allium glandulosum   | 23.121129  |
| 192 | Amaryllidaceae | Allium glandulosum   | 17.7108333 |
| 193 | Amaryllidaceae | Allium glandulosum   | 18.1275    |
| 194 | Amaryllidaceae | Allium glandulosum   | 18.5108333 |
| 195 | Amaryllidaceae | Allium glandulosum   | 18.2941667 |
| 196 | Amaryllidaceae | Allium glandulosum   | 18.2941667 |
| 197 | Amaryllidaceae | Allium glandulosum   | 31.9       |
| 198 | Amaryllidaceae | Allium glandulosum   | 28.1583333 |
| 199 | Amaryllidaceae | Allium haematochiton | 27.54      |
| 200 | Amaryllidaceae | Allium haematochiton | 29.06      |
| 201 | Amaryllidaceae | Allium haematochiton | 27.54      |
| 202 | Amaryllidaceae | Allium haematochiton | 29.06      |
| 203 | Amaryllidaceae | Allium haematochiton | 26.9775    |
| 204 | Amaryllidaceae | Allium haematochiton | 32.505218  |
| 205 | Amaryllidaceae | Allium haematochiton | 29.0169444 |
| 206 | Amaryllidaceae | Allium haematochiton | 32.336424  |
| 207 | Amaryllidaceae | Allium haematochiton | 32.0333333 |
| 208 | Amaryllidaceae | Allium haematochiton | 30.965805  |
| 209 | Amaryllidaceae | Allium hintoniorum   | 24.113     |
| 210 | Amaryllidaceae | Allium hintoniorum   | 25.2166667 |
| 211 | Amaryllidaceae | Allium hintoniorum   | 24.7533306 |
| 212 | Amaryllidaceae | Allium hintoniorum   | 23.9786111 |
| 213 | Amaryllidaceae | Allium huntiae       | 24.02      |
| 214 | Amaryllidaceae | Allium mannii        | 37.290111  |
| 215 | Amaryllidaceae | Allium melliferum    | 20.399999  |
| 216 | Amaryllidaceae | Allium mexicanum     | 24.049556  |
| 217 | Amaryllidaceae | Allium ownbeyi       | 26.14736   |
| 218 | Amaryllidaceae | Allium peninsulare   | 32.5627778 |
| 219 | Amaryllidaceae | Allium peninsulare   | 29.9720667 |
| 220 | Amaryllidaceae | Allium plummerae     | 30.9608333 |
| 221 | Amaryllidaceae | Allium plummerae     | 30.9608333 |
| 222 | Amaryllidaceae | Allium plummerae     | 22.15      |
| 223 | Amaryllidaceae | Allium praecox       | 31.5775    |

|     |                |                               |            |
|-----|----------------|-------------------------------|------------|
| 224 | Amaryllidaceae | <i>Allium praecox</i>         | 30.05      |
| 225 | Amaryllidaceae | <i>Allium pueblanum</i>       | 18.314541  |
| 226 | Amaryllidaceae | <i>Allium rhizomatum</i>      | 28.2780556 |
| 227 | Amaryllidaceae | <i>Allium rhizomatum</i>      | 19.3700083 |
| 228 | Amaryllidaceae | <i>Allium rhizomatum</i>      | 29.7588889 |
| 232 | Amaryllidaceae | <i>Allium rhizomatum</i>      | 23.62      |
| 233 | Amaryllidaceae | <i>Allium stoloniferum</i>    | 20.2608333 |
| 234 | Amaryllidaceae | <i>Allium stoloniferum</i>    | 20.185     |
| 235 | Amaryllidaceae | <i>Allium stoloniferum</i>    | 19.3488889 |
| 236 | Amaryllidaceae | <i>Allium stoloniferum</i>    | 18.4883306 |
| 237 | Amaryllidaceae | <i>Allium telaponense</i>     | 19.379219  |
| 238 | Amaryllidaceae | <i>Crinum americanum</i>      | 19.513813  |
| 239 | Amaryllidaceae | <i>Crinum americanum</i>      | 20.975766  |
| 240 | Amaryllidaceae | <i>Crinum americanum</i>      | 19.118976  |
| 241 | Amaryllidaceae | <i>Crinum americanum</i>      | 18.739511  |
| 242 | Amaryllidaceae | <i>Crinum americanum</i>      | 19.595566  |
| 243 | Amaryllidaceae | <i>Crinum americanum</i>      | 15.1941667 |
| 244 | Amaryllidaceae | <i>Crinum americanum</i>      | 18.49613   |
| 245 | Amaryllidaceae | <i>Crinum americanum</i>      | 17.7275    |
| 246 | Amaryllidaceae | <i>Crinum americanum</i>      | 19.0516667 |
| 248 | Amaryllidaceae | <i>Crinum americanum</i>      | 17.7775    |
| 249 | Amaryllidaceae | <i>Crinum americanum</i>      | 18.8108333 |
| 250 | Amaryllidaceae | <i>Crinum americanum</i>      | 20.3355556 |
| 252 | Amaryllidaceae | <i>Habranthus arenicola</i>   | 24.719666  |
| 257 | Amaryllidaceae | <i>Habranthus chichimeca</i>  | 23.935884  |
| 258 | Amaryllidaceae | <i>Habranthus chichimeca</i>  | 23.895209  |
| 259 | Amaryllidaceae | <i>Habranthus chichimeca</i>  | 23.342617  |
| 260 | Amaryllidaceae | <i>Habranthus chichimeca</i>  | 23.128354  |
| 275 | Amaryllidaceae | <i>Zephyranthes conzattii</i> | 17.269945  |
| 276 | Amaryllidaceae | <i>Habranthus longifolius</i> | 31.037401  |
| 277 | Amaryllidaceae | <i>Habranthus longifolius</i> | 28.495316  |
| 278 | Amaryllidaceae | <i>Habranthus longifolius</i> | 25.921617  |
| 279 | Amaryllidaceae | <i>Habranthus longifolius</i> | 22.2108    |
| 280 | Amaryllidaceae | <i>Habranthus longifolius</i> | 24.782273  |
| 281 | Amaryllidaceae | <i>Habranthus medinae</i>     | 18.194843  |
| 282 | Amaryllidaceae | <i>Habranthus mexicanus</i>   | 21.111593  |
| 283 | Amaryllidaceae | <i>Habranthus vittatus</i>    | 17.858331  |
| 284 | Amaryllidaceae | <i>Nothoscordum bivalve</i>   | 19.8441667 |
| 285 | Amaryllidaceae | <i>Nothoscordum bivalve</i>   | 19.7861111 |
| 286 | Amaryllidaceae | <i>Nothoscordum bivalve</i>   | 21.3108333 |
| 287 | Amaryllidaceae | <i>Nothoscordum bivalve</i>   | 19.6441667 |
| 288 | Amaryllidaceae | <i>Nothoscordum bivalve</i>   | 21.8608333 |
| 289 | Amaryllidaceae | <i>Nothoscordum bivalve</i>   | 19.3441667 |
| 290 | Amaryllidaceae | <i>Nothoscordum bivalve</i>   | 20.8608333 |
| 291 | Amaryllidaceae | <i>Nothoscordum bivalve</i>   | 19.5083333 |

|     |                |                           |            |
|-----|----------------|---------------------------|------------|
| 292 | Amaryllidaceae | Nothoscordum bivalve      | 20.2275    |
| 293 | Amaryllidaceae | Nothoscordum bivalve      | 19.596234  |
| 294 | Amaryllidaceae | Nothoscordum bivalve      | 19.3061111 |
| 295 | Amaryllidaceae | Nothoscordum bivalve      | 25.2836028 |
| 296 | Amaryllidaceae | Nothoscordum bivalve      | 25.3496556 |
| 297 | Amaryllidaceae | Nothoscordum bivalve      | 29.1       |
| 298 | Amaryllidaceae | Nothoscordum bivalve      | 23.4556667 |
| 299 | Amaryllidaceae | Nothoscordum bivalve      | 23.9857472 |
| 300 | Amaryllidaceae | Nothoscordum bivalve      | 25.85      |
| 301 | Amaryllidaceae | Nothoscordum bivalve      | 27.8302333 |
| 302 | Amaryllidaceae | Nothoscordum bivalve      | 16.7479417 |
| 303 | Amaryllidaceae | Nothoscordum bivalve      | 18.1755944 |
| 304 | Amaryllidaceae | Nothoscordum bivalve      | 24.1042083 |
| 305 | Amaryllidaceae | Nothoscordum bivalve      | 28.3794444 |
| 306 | Amaryllidaceae | Nothoscordum bivalve      | 17.3463889 |
| 307 | Amaryllidaceae | Nothoscordum bivalve      | 22.1347222 |
| 308 | Amaryllidaceae | Nothoscordum bivalve      | 18.9616667 |
| 309 | Amaryllidaceae | Nothoscordum bivalve      | 23.3836111 |
| 310 | Amaryllidaceae | Nothoscordum gracile      | 20.0694444 |
| 311 | Amaryllidaceae | Nothoscordum gracile      | 25.85      |
| 312 | Amaryllidaceae | Nothoscordum gracile      | 16.7038889 |
| 313 | Amaryllidaceae | Nothoscordum gracile      | 29.9833    |
| 314 | Amaryllidaceae | Nothoscordum gracile      | 25         |
| 315 | Amaryllidaceae | Nothoscordum gracile      | 24.0333337 |
| 316 | Amaryllidaceae | Nothoscordum gracile      | 19.01666   |
| 317 | Amaryllidaceae | Nothoscordum gracile      | 19.39972   |
| 318 | Amaryllidaceae | Nothoscordum gracile      | 24.59      |
| 319 | Amaryllidaceae | Nothoscordum gracile      | 18.8472222 |
| 320 | Amaryllidaceae | Nothoscordum gracile      | 22.15      |
| 322 | Amaryllidaceae | Hymenocallis acutifolia   | 19.3186833 |
| 323 | Amaryllidaceae | Hymenocallis acutifolia   | 18.905     |
| 324 | Amaryllidaceae | Hymenocallis acutifolia   | 21.865     |
| 325 | Amaryllidaceae | Hymenocallis acutifolia   | 21.5166667 |
| 326 | Amaryllidaceae | Hymenocallis acutifolia   | 18.13333   |
| 327 | Amaryllidaceae | Hymenocallis astrotephana | 17.591397  |
| 328 | Amaryllidaceae | Hymenocallis azteciana    | 20.3530556 |
| 329 | Amaryllidaceae | Hymenocallis azteciana    | 21.3608333 |
| 330 | Amaryllidaceae | Hymenocallis cleo         | 16.69857   |
| 331 | Amaryllidaceae | Hymenocallis clivorum     | 28.4669444 |
| 332 | Amaryllidaceae | Hymenocallis concinna     | 18.48024   |
| 333 | Amaryllidaceae | Hymenocallis glauca       | 18.5386111 |
| 334 | Amaryllidaceae | Hymenocallis glauca       | 17.942784  |
| 335 | Amaryllidaceae | Hymenocallis glauca       | 18.9666667 |
| 336 | Amaryllidaceae | Hymenocallis graminifolia | 18.9408333 |
| 337 | Amaryllidaceae | Hymenocallis graminifolia | 18.9066667 |

|     |                |                            |            |
|-----|----------------|----------------------------|------------|
| 338 | Amaryllidaceae | Hymenocallis guerreroensis | 17.6275    |
| 339 | Amaryllidaceae | Hymenocallis guerreroensis | 17.6516667 |
| 340 | Amaryllidaceae | Hymenocallis harrisiana    | 19.6819444 |
| 341 | Amaryllidaceae | Hymenocallis harrisiana    | 17.9608333 |
| 342 | Amaryllidaceae | Hymenocallis harrisiana    | 19.4855556 |
| 343 | Amaryllidaceae | Hymenocallis harrisiana    | 18.9866667 |
| 344 | Amaryllidaceae | Hymenocallis harrisiana    | 19.0166667 |
| 345 | Amaryllidaceae | Hymenocallis harrisiana    | 18.2108333 |
| 346 | Amaryllidaceae | Hymenocallis howardii      | 20.2275    |
| 347 | Amaryllidaceae | Hymenocallis howardii      | 21.2113889 |
| 348 | Amaryllidaceae | Hymenocallis howardii      | 20.9066667 |
| 349 | Amaryllidaceae | Hymenocallis jaliscensis   | 19.5583333 |
| 350 | Amaryllidaceae | Hymenocallis jaliscensis   | 20.28333   |
| 351 | Amaryllidaceae | Hymenocallis leavenworthii | 19.45      |
| 352 | Amaryllidaceae | Hymenocallis leavenworthii | 19.5466667 |
| 353 | Amaryllidaceae | Hymenocallis littoralis    | 18.1416667 |
| 354 | Amaryllidaceae | Hymenocallis littoralis    | 18.8775    |
| 355 | Amaryllidaceae | Hymenocallis littoralis    | 19.2108333 |
| 356 | Amaryllidaceae | Hymenocallis littoralis    | 16.9275    |
| 357 | Amaryllidaceae | Hymenocallis littoralis    | 19.8516667 |
| 358 | Amaryllidaceae | Hymenocallis littoralis    | 20.138614  |
| 359 | Amaryllidaceae | Hymenocallis littoralis    | 18.0985444 |
| 360 | Amaryllidaceae | Hymenocallis littoralis    | 21.179694  |
| 361 | Amaryllidaceae | Hymenocallis littoralis    | 20.5375    |
| 362 | Amaryllidaceae | Hymenocallis littoralis    | 20.6916667 |
| 363 | Amaryllidaceae | Hymenocallis partita       | 16.12      |
| 364 | Amaryllidaceae | Hymenocallis pimana        | 28.4275    |
| 365 | Amaryllidaceae | Hymenocallis pimana        | 28.7111111 |
| 366 | Amaryllidaceae | Hymenocallis pimana        | 28.4952778 |
| 367 | Amaryllidaceae | Hymenocallis proterantha   | 18.6363889 |
| 368 | Amaryllidaceae | Hymenocallis proterantha   | 19.7708333 |
| 369 | Amaryllidaceae | Hymenocallis proterantha   | 21.5166667 |
| 370 | Amaryllidaceae | Hymenocallis pumila        | 19.2516667 |
| 371 | Amaryllidaceae | Hymenocallis pumila        | 19.6733333 |
| 372 | Amaryllidaceae | Hymenocallis sonorensis    | 27.0083333 |
| 373 | Amaryllidaceae | Hymenocallis sonorensis    | 28.5726361 |
| 374 | Amaryllidaceae | Hymenocallis sonorensis    | 26.9125    |
| 375 | Amaryllidaceae | Hymenocallis sonorensis    | 30.7027778 |
| 376 | Amaryllidaceae | Hymenocallis vasconcelosii | 17.404318  |
| 377 | Amaryllidaceae | Hymenocallis woelfleana    | 21.1439889 |
| 392 | Amaryllidaceae | Sprekelia formosissima     | 20.1652778 |
| 393 | Amaryllidaceae | Sprekelia formosissima     | 19.5883333 |
| 394 | Amaryllidaceae | Sprekelia formosissima     | 19.5275    |
| 395 | Amaryllidaceae | Sprekelia formosissima     | 18.8483333 |
| 396 | Amaryllidaceae | Sprekelia formosissima     | 20.20812   |



|     |                |                           |            |
|-----|----------------|---------------------------|------------|
| 397 | Amaryllidaceae | Sprekelia formosissima    | 21.3275    |
| 398 | Amaryllidaceae | Sprekelia formosissima    | 17.9941667 |
| 399 | Amaryllidaceae | Sprekelia formosissima    | 17.8275    |
| 400 | Amaryllidaceae | Sprekelia formosissima    | 23.3466667 |
| 401 | Amaryllidaceae | Sprekelia formosissima    | 19.7702778 |
| 402 | Amaryllidaceae | Sprekelia formosissima    | 19.4197222 |
| 403 | Amaryllidaceae | Sprekelia formosissima    | 20.0625    |
| 404 | Amaryllidaceae | Sprekelia formosissima    | 19.2013889 |
| 405 | Amaryllidaceae | Sprekelia formosissima    | 19.2875    |
| 406 | Amaryllidaceae | Sprekelia formosissima    | 19.7211111 |
| 407 | Amaryllidaceae | Sprekelia formosissima    | 18.0333333 |
| 408 | Amaryllidaceae | Sprekelia formosissima    | 19.3884    |
| 409 | Amaryllidaceae | Sprekelia formosissima    | 26.1181528 |
| 410 | Amaryllidaceae | Sprekelia formosissima    | 25.0833333 |
| 411 | Amaryllidaceae | Sprekelia formosissima    | 17.4716667 |
| 412 | Amaryllidaceae | Sprekelia formosissima    | 19.7713083 |
| 413 | Amaryllidaceae | Sprekelia formosissima    | 18.9366667 |
| 414 | Amaryllidaceae | Sprekelia formosissima    | 19.855     |
| 415 | Amaryllidaceae | Sprekelia formosissima    | 18.1680556 |
| 416 | Amaryllidaceae | Sprekelia formosissima    | 21.7416667 |
| 417 | Amaryllidaceae | Sprekelia formosissima    | 21.175     |
| 419 | Amaryllidaceae | Zephyranthes clintiae     | 21.127779  |
| 420 | Amaryllidaceae | Zephyranthes clintiae     | 19.556361  |
| 421 | Amaryllidaceae | Zephyranthes clintiae     | 21.1108083 |
| 422 | Amaryllidaceae | Zephyranthes clintiae     | 20.15186   |
| 423 | Amaryllidaceae | Zephyranthes lindleyana   | 18.8497222 |
| 424 | Amaryllidaceae | Zephyranthes lindleyana   | 22.4441667 |
| 425 | Amaryllidaceae | Zephyranthes lindleyana   | 25.6711111 |
| 426 | Amaryllidaceae | Zephyranthes lindleyana   | 20.4733333 |
| 427 | Amaryllidaceae | Zephyranthes lindleyana   | 20.018973  |
| 428 | Amaryllidaceae | Zephyranthes lindleyana   | 18.1108333 |
| 429 | Amaryllidaceae | Zephyranthes lindleyana   | 20.58201   |
| 430 | Amaryllidaceae | Zephyranthes miradorensis | 19.513813  |
| 431 | Amaryllidaceae | Zephyranthes nelsonii     | 16.67305   |
| 432 | Amaryllidaceae | Zephyranthes bella        | 22.637178  |
| 433 | Amaryllidaceae | Zephyranthes brevipes     | 20.1297222 |
| 434 | Amaryllidaceae | Zephyranthes brevipes     | 19.8355556 |
| 435 | Amaryllidaceae | Zephyranthes brevipes     | 19.788444  |
| 436 | Amaryllidaceae | Zephyranthes brevipes     | 19.7702778 |
| 437 | Amaryllidaceae | Zephyranthes brevipes     | 18.9852806 |
| 438 | Amaryllidaceae | Zephyranthes brevipes     | 19.5294444 |
| 439 | Amaryllidaceae | Zephyranthes carinata     | 19.355472  |
| 440 | Amaryllidaceae | Zephyranthes carinata     | 19.9441667 |
| 441 | Amaryllidaceae | Zephyranthes carinata     | 19.513813  |
| 442 | Amaryllidaceae | Zephyranthes carinata     | 19.045846  |

|     |                |                             |            |
|-----|----------------|-----------------------------|------------|
| 443 | Amaryllidaceae | Zephyranthes carinata       | 18.98      |
| 444 | Amaryllidaceae | Zephyranthes carinata       | 19.6183333 |
| 445 | Amaryllidaceae | Zephyranthes carinata       | 21.052134  |
| 446 | Amaryllidaceae | Zephyranthes carinata       | 21.355421  |
| 447 | Amaryllidaceae | Zephyranthes carinata       | 20.063359  |
| 448 | Amaryllidaceae | Zephyranthes carinata       | 20.5       |
| 449 | Amaryllidaceae | Zephyranthes carinata       | 17.7608333 |
| 450 | Amaryllidaceae | Zephyranthes carinata       | 20.9669444 |
| 451 | Amaryllidaceae | Zephyranthes carinata       | 16.2913889 |
| 452 | Amaryllidaceae | Zephyranthes citrina        | 21.58397   |
| 453 | Amaryllidaceae | Zephyranthes citrina        | 19.9313889 |
| 454 | Amaryllidaceae | Zephyranthes latissimifolia | 20.361776  |
| 455 | Amaryllidaceae | Zephyranthes leucantha      | 20.850147  |
| 456 | Amaryllidaceae | Zephyranthes moctezumae     | 21.254003  |
| 457 | Amaryllidaceae | Zephyranthes morrisclintii  | 24.0994389 |
| 458 | Amaryllidaceae | Zephyranthes morrisclintii  | 24.7827778 |
| 459 | Amaryllidaceae | Zephyranthes nymphaea       | 22.534928  |
| 460 | Amaryllidaceae | Zephyranthes primulina      | 21.670475  |
| 461 | Amaryllidaceae | Zephyranthes primulina      | 23.23      |
| 462 | Amaryllidaceae | Zephyranthes reginae        | 21.662942  |
| 463 | Amaryllidaceae | Zephyranthes sessilis       | 18.0667    |
| 464 | Amaryllidaceae | Zephyranthes subflava       | 22.372468  |
| 465 | Amaryllidaceae | Zephyranthes subflava       | 22.541003  |
| 466 | Asparagaceae   | Chlorogalum parviflorum     | 32.5666667 |
| 467 | Asparagaceae   | Muilla maritima             | 32.1108333 |
| 468 | Asparagaceae   | Muilla maritima             | 26.746528  |
| 469 | Asparagaceae   | Muilla maritima             | 30.9833333 |
| 470 | Asparagaceae   | Bloomeria crocea            | 30.9666667 |
| 471 | Asparagaceae   | Bloomeria crocea            | 32.3166667 |
| 472 | Asparagaceae   | Dichelostemma capitatum     | 32.0833333 |
| 473 | Asparagaceae   | Dichelostemma capitatum     | 29.5666667 |
| 474 | Asparagaceae   | Dichelostemma capitatum     | 28.8655556 |
| 475 | Asparagaceae   | Triteleiopsis palmeri       | 29.378225  |
| 476 | Asparagaceae   | Triteleiopsis palmeri       | 27.362831  |
| 477 | Asparagaceae   | Triteleiopsis palmeri       | 28.9833333 |
| 478 | Asparagaceae   | Triteleiopsis palmeri       | 29.525     |
| 479 | Asparagaceae   | Triteleiopsis palmeri       | 32.3616667 |
| 480 | Asparagaceae   | Chlorogalum parviflorum     | 32.3666667 |
| 481 | Asparagaceae   | Triteleia guadalupensis     | 29.043966  |
| 482 | Iridaceae      | Ainea conzattii             | 17.2733    |
| 483 | Iridaceae      | Alophia drummondii          | 19.370098  |
| 484 | Iridaceae      | Alophia drummondii          | 16.4758139 |
| 485 | Iridaceae      | Alophia drummondii          | 16.5284833 |
| 486 | Iridaceae      | Alophia drummondii          | 23.359737  |
| 487 | Iridaceae      | Alophia drummondii          | 21.640101  |

|               |                                 |            |
|---------------|---------------------------------|------------|
| 488 Iridaceae | <i>Alophia drummondii</i>       | 24.3375    |
| 489 Iridaceae | <i>Alophia drummondii</i>       | 21.6344444 |
| 490 Iridaceae | <i>Alophia veracruzana</i>      | 22.1861111 |
| 491 Iridaceae | <i>Alophia veracruzana</i>      | 19.523122  |
| 492 Iridaceae | <i>Alophia silvestris</i>       | 19.2275    |
| 493 Iridaceae | <i>Alophia silvestris</i>       | 18.2180556 |
| 494 Iridaceae | <i>Alophia silvestris</i>       | 17.835     |
| 495 Iridaceae | <i>Cardiostigma longispatha</i> | 19.1933333 |
| 496 Iridaceae | <i>Cardiostigma longispatha</i> | 23.0116667 |
| 497 Iridaceae | <i>Cardiostigma longispatha</i> | 23.4775    |
| 498 Iridaceae | <i>Cardiostigma longispatha</i> | 18.9408333 |
| 499 Iridaceae | <i>Cardiostigma longispatha</i> | 18.85      |
| 500 Iridaceae | <i>Cardiostigma longispatha</i> | 19.798169  |
| 501 Iridaceae | <i>Cardiostigma longispatha</i> | 22.190981  |
| 502 Iridaceae | <i>Cardiostigma longispatha</i> | 18.614531  |
| 503 Iridaceae | <i>Cardiostigma mexicana</i>    | 18.9263889 |
| 504 Iridaceae | <i>Cardiostigma hintonii</i>    | 20.061653  |
| 505 Iridaceae | <i>Cipura campanulata</i>       | 18.905773  |
| 506 Iridaceae | <i>Cipura campanulata</i>       | 18.811409  |
| 507 Iridaceae | <i>Cipura campanulata</i>       | 20.7454833 |
| 508 Iridaceae | <i>Cipura campanulata</i>       | 19.9888889 |
| 509 Iridaceae | <i>Cipura campanulata</i>       | 17.5360806 |
| 510 Iridaceae | <i>Cipura campanulata</i>       | 17.9755611 |
| 511 Iridaceae | <i>Cipura campanulata</i>       | 18.7355611 |
| 512 Iridaceae | <i>Cipura campanulata</i>       | 18.5386111 |
| 513 Iridaceae | <i>Cipura paludosa</i>          | 19.8333333 |
| 514 Iridaceae | <i>Cipura paludosa</i>          | 18.2583333 |
| 515 Iridaceae | <i>Cipura paludosa</i>          | 20.8108333 |
| 516 Iridaceae | <i>Cipura paludosa</i>          | 20.2608333 |
| 517 Iridaceae | <i>Cipura paludosa</i>          | 18.4775    |
| 518 Iridaceae | <i>Cipura paludosa</i>          | 20.8275    |
| 519 Iridaceae | <i>Cipura paludosa</i>          | 17.8275    |
| 520 Iridaceae | <i>Cipura paludosa</i>          | 18.49613   |
| 521 Iridaceae | <i>Cipura paludosa</i>          | 16.5065333 |
| 522 Iridaceae | <i>Cipura paludosa</i>          | 21.0433333 |
| 523 Iridaceae | <i>Cipura paludosa</i>          | 21.2366667 |
| 524 Iridaceae | <i>Cipura paludosa</i>          | 21.5166667 |
| 525 Iridaceae | <i>Cipura paludosa</i>          | 18.9166667 |
| 526 Iridaceae | <i>Cipura paludosa</i>          | 19.7666667 |
| 527 Iridaceae | <i>Cipura paludosa</i>          | 16.1333333 |
| 528 Iridaceae | <i>Cipura paludosa</i>          | 19.0111111 |
| 529 Iridaceae | <i>Cipura paludosa</i>          | 20.8922222 |
| 530 Iridaceae | <i>Cipura paludosa</i>          | 21.0875    |
| 531 Iridaceae | <i>Eleutherine latifolia</i>    | 19.597526  |
| 532 Iridaceae | <i>Eleutherine latifolia</i>    | 18.5408333 |

|               |                                                   |            |
|---------------|---------------------------------------------------|------------|
| 533 Iridaceae | <i>Eleutherine latifolia</i>                      | 19.400166  |
| 534 Iridaceae | <i>Eleutherine latifolia</i>                      | 21.34      |
| 535 Iridaceae | <i>Eleutherine latifolia</i>                      | 23.3177806 |
| 536 Iridaceae | <i>Eleutherine latifolia</i>                      | 22.488075  |
| 537 Iridaceae | <i>Eleutherine latifolia</i>                      | 18.085     |
| 538 Iridaceae | <i>Eleutherine latifolia</i>                      | 21.2216667 |
| 539 Iridaceae | <i>Eleutherine bulbosa</i>                        | 19.36262   |
| 540 Iridaceae | <i>Eleutherine bulbosa</i>                        | 18.6941667 |
| 541 Iridaceae | <i>Eleutherine bulbosa</i>                        | 18.0108333 |
| 542 Iridaceae | <i>Eleutherine bulbosa</i>                        | 22.160501  |
| 543 Iridaceae | <i>Eleutherine bulbosa</i>                        | 19.196725  |
| 544 Iridaceae | <i>Fosteria oaxacana</i>                          | 17.3422222 |
| 545 Iridaceae | <i>Fosteria oaxacana</i>                          | 16.9166667 |
| 546 Iridaceae | <i>Fosteria oaxacana</i>                          | 17         |
| 547 Iridaceae | <i>Iris missouriensis</i>                         | 27.7237778 |
| 548 Iridaceae | <i>Iris missouriensis</i>                         | 25.2280611 |
| 549 Iridaceae | <i>Nemastylis tenuis</i>                          | 21.2933333 |
| 550 Iridaceae | <i>Nemastylis tenuis</i>                          | 23.3947222 |
| 551 Iridaceae | <i>Nemastylis tenuis</i>                          | 18.8005556 |
| 552 Iridaceae | <i>Nemastylis tenuis</i>                          | 18.9519444 |
| 553 Iridaceae | <i>Nemastylis tenuis</i>                          | 20.1447222 |
| 554 Iridaceae | <i>Nemastylis tenuis</i>                          | 19.1683306 |
| 555 Iridaceae | <i>Nemastylis tenuis</i>                          | 23.8666667 |
| 556 Iridaceae | <i>Nemastylis tenuis</i>                          | 20.1596611 |
| 557 Iridaceae | <i>Nemastylis tenuis</i>                          | 26.1676    |
| 558 Iridaceae | <i>Nemastylis tenuis</i>                          | 23.4556667 |
| 559 Iridaceae | <i>Nemastylis tenuis</i>                          | 26.3719444 |
| 560 Iridaceae | <i>Nemastylis tenuis</i> spp. <i>pringlei</i>     | 30.1402361 |
| 561 Iridaceae | <i>Nemastylis tenuis</i> spp. <i>pringlei</i>     | 19.3297194 |
| 562 Iridaceae | <i>Nemastylis tenuis</i> spp. <i>pringlei</i>     | 20.7236194 |
| 563 Iridaceae | <i>Nemastylis tenuis</i> var. <i>nana</i>         | 19.6257111 |
| 564 Iridaceae | <i>Nemastylis tenuis</i>                          | 23.4033333 |
| 565 Iridaceae | <i>Nemastylis tenuis</i> spp. <i>coerulescens</i> | 18.9666667 |
| 566 Iridaceae | <i>Nemastylis tenuis</i> var. <i>nana</i>         | 20.1444444 |
| 567 Iridaceae | <i>Nemastylis tenuis</i> spp. <i>pringlei</i>     | 23.9833333 |
| 568 Iridaceae | <i>Nemastylis tenuis</i> var. <i>tenuis</i>       | 28.4275    |
| 569 Iridaceae | <i>Nemastylis tenuis</i>                          | 27.9722222 |
| 570 Iridaceae | <i>Colima convoluta</i>                           | 19.310813  |
| 571 Iridaceae | <i>Colima convoluta</i>                           | 19.05      |
| 572 Iridaceae | <i>Colima tuitensis</i>                           | 22.0397222 |
| 573 Iridaceae | <i>Orthrosanthus exsertus</i>                     | 19.4608333 |
| 574 Iridaceae | <i>Orthrosanthus exsertus</i>                     | 19.4325    |
| 575 Iridaceae | <i>Orthrosanthus exsertus</i>                     | 19.675     |
| 576 Iridaceae | <i>Orthrosanthus exsertus</i>                     | 19.2888889 |
| 577 Iridaceae | <i>Orthrosanthus exsertus</i>                     | 23.0461111 |

|               |                                           |            |
|---------------|-------------------------------------------|------------|
| 578 Iridaceae | Orthrosanthus exsertus                    | 20.7283333 |
| 579 Iridaceae | Orthrosanthus exsertus                    | 21.2063889 |
| 580 Iridaceae | Orthrosanthus exsertus                    | 17.0283333 |
| 581 Iridaceae | Orthrosanthus monadelphus                 | 16.7377778 |
| 582 Iridaceae | Orthrosanthus monadelphus                 | 16.1758333 |
| 583 Iridaceae | Orthrosanthus monadelphus                 | 19.1608333 |
| 584 Iridaceae | Orthrosanthus monadelphus                 | 17.5861111 |
| 585 Iridaceae | Orthrosanthus monadelphus                 | 16.1016667 |
| 586 Iridaceae | Sessilanthera heliantha                   | 18.24      |
| 587 Iridaceae | Sessilanthera heliantha                   | 17.5513889 |
| 588 Iridaceae | Sessilanthera latifolia spp. lutea        | 18.2012278 |
| 589 Iridaceae | Sessilanthera citrina                     | 17.701597  |
| 590 Iridaceae | Tigridia ehrenbergii                      | 20.1333333 |
| 591 Iridaceae | Tigridia ehrenbergii                      | 19.5055556 |
| 592 Iridaceae | Tigridia ehrenbergii spp. flaviglandifera | 21.0277778 |
| 593 Iridaceae | Tigridia ehrenbergii                      | 20.5292583 |
| 594 Iridaceae | Tigridia ehrenbergii                      | 20.5661333 |
| 595 Iridaceae | Tigridia ehrenbergii spp. ehrenbergii     | 18.9166667 |
| 596 Iridaceae | Tigridia ehrenbergii                      | 19.0833333 |
| 597 Iridaceae | Tigridia pavonia                          | 19.8983333 |
| 598 Iridaceae | Tigridia pavonia                          | 19.513813  |
| 599 Iridaceae | Tigridia pavonia                          | 19.698263  |
| 600 Iridaceae | Tigridia pavonia                          | 19.126716  |
| 601 Iridaceae | Tigridia pavonia                          | 21.2775    |
| 602 Iridaceae | Tigridia pavonia                          | 19.3441667 |
| 603 Iridaceae | Tigridia pavonia                          | 17.3625    |
| 604 Iridaceae | Tigridia pavonia                          | 18.6513139 |
| 605 Iridaceae | Tigridia pavonia                          | 27.3717556 |
| 606 Iridaceae | Tigridia pavonia                          | 28.4952778 |
| 607 Iridaceae | Tigridia pavonia                          | 25.1833333 |
| 608 Iridaceae | Tigridia pavonia                          | 23.3333    |
| 609 Iridaceae | Tigridia pavonia                          | 20.215     |
| 610 Iridaceae | Tigridia pavonia                          | 20.2116667 |
| 611 Iridaceae | Tigridia pavonia                          | 18.8566667 |
| 612 Iridaceae | Tigridia pavonia                          | 21.2366667 |
| 613 Iridaceae | Tigridia pavonia                          | 20.2566667 |
| 614 Iridaceae | Tigridia pavonia                          | 16.7166667 |
| 615 Iridaceae | Tigridia alpestris                        | 19.6216667 |
| 616 Iridaceae | Tigridia alpestris                        | 20.2275    |
| 617 Iridaceae | Tigridia alpestris                        | 18.9066667 |
| 618 Iridaceae | Tigridia amatlanensis                     | 17.595444  |
| 619 Iridaceae | Tigridia augusta                          | 20.11      |
| 620 Iridaceae | Tigridia augusta                          | 22.3036111 |
| 621 Iridaceae | Tigridia augusta                          | 19.7816667 |
| 622 Iridaceae | Tigridia augusta                          | 21.0166667 |

|               |                                                 |            |
|---------------|-------------------------------------------------|------------|
| 623 Iridaceae | <i>Tigridia bicolor</i>                         | 17.7441667 |
| 624 Iridaceae | <i>Tigridia bicolor</i>                         | 17.8775    |
| 625 Iridaceae | <i>Tigridia catarinensis</i>                    | 22.5166667 |
| 626 Iridaceae | <i>Tigridia chiapensis</i>                      | 16.73      |
| 627 Iridaceae | <i>Tigridia chrysantha</i>                      | 20.45      |
| 628 Iridaceae | <i>Tigridia dugesii</i>                         | 20.6775    |
| 629 Iridaceae | <i>Tigridia durangensis</i>                     | 23.7783333 |
| 630 Iridaceae | <i>Tigridia durangensis</i>                     | 23.4775    |
| 631 Iridaceae | <i>Tigridia estelae</i>                         | 24.8033333 |
| 632 Iridaceae | <i>Tigridia flammea</i>                         | 19.128087  |
| 633 Iridaceae | <i>Tigridia galanthoides</i>                    | 18.8497222 |
| 634 Iridaceae | <i>Tigridia galanthoides</i>                    | 16.2517389 |
| 635 Iridaceae | <i>Tigridia galanthoides</i>                    | 17.6516667 |
| 636 Iridaceae | <i>Tigridia gracietae</i>                       | 19.0298611 |
| 637 Iridaceae | <i>Tigridia hallbergii</i>                      | 16.7608333 |
| 638 Iridaceae | <i>Tigridia hallbergii</i>                      | 21.2875    |
| 639 Iridaceae | <i>Tigridia hallbergii</i>                      | 17.265     |
| 640 Iridaceae | <i>Tigridia hintonii</i>                        | 17.901582  |
| 641 Iridaceae | <i>Tigridia huajuapansensis</i>                 | 17.2261111 |
| 642 Iridaceae | <i>Tigridia huajuapansensis</i>                 | 17.9055556 |
| 643 Iridaceae | <i>Tigridia huajuapansensis</i>                 | 17.0258333 |
| 644 Iridaceae | <i>Tigridia huajuapansensis</i>                 | 17.82      |
| 645 Iridaceae | <i>Tigridia illecebrosa</i>                     | 18.03333   |
| 646 Iridaceae | <i>Tigridia inusitata</i>                       | 17.2667    |
| 647 Iridaceae | <i>Tigridia inusitata</i>                       | 17.4114    |
| 648 Iridaceae | <i>Tigridia immaculata</i>                      | 16.637306  |
| 649 Iridaceae | <i>Tigridia immaculata</i>                      | 17.169718  |
| 650 Iridaceae | <i>Tigridia mariaetrinitatis</i>                | 17.0336111 |
| 651 Iridaceae | <i>Tigridia martinezii</i>                      | 20.2138889 |
| 652 Iridaceae | <i>Tigridia martinezii</i>                      | 20.135     |
| 653 Iridaceae | <i>Tigridia matudae</i>                         | 19.1583333 |
| 654 Iridaceae | <i>Tigridia matudae</i>                         | 19.0333333 |
| 655 Iridaceae | <i>Tigridia meleagris</i>                       | 19.5380556 |
| 656 Iridaceae | <i>Tigridia meleagris</i>                       | 19.6941667 |
| 657 Iridaceae | <i>Tigridia meleagris</i>                       | 18.98      |
| 658 Iridaceae | <i>Tigridia meleagris</i>                       | 19.31      |
| 659 Iridaceae | <i>Tigridia meleagris</i>                       | 18.7033333 |
| 660 Iridaceae | <i>Tigridia mexicana</i>                        | 19.1933333 |
| 661 Iridaceae | <i>Tigridia mexicana</i>                        | 20.5608333 |
| 662 Iridaceae | <i>Tigridia mexicana</i>                        | 24.3177778 |
| 663 Iridaceae | <i>Tigridia mexicana</i> spp. <i>lilacina</i>   | 19.4211111 |
| 664 Iridaceae | <i>Tigridia mexicana</i> spp. <i>passiflora</i> | 21.3333333 |
| 665 Iridaceae | <i>Tigridia mexicana</i> spp. <i>passiflora</i> | 20.7833333 |
| 666 Iridaceae | <i>Tigridia molseediana</i>                     | 17.0977278 |
| 667 Iridaceae | <i>Tigridia multiflora</i>                      | 19.0133333 |

|                 |                                                   |            |
|-----------------|---------------------------------------------------|------------|
| 668 Iridaceae   | <i>Tigridia multiflora</i>                        | 23.3961111 |
| 669 Iridaceae   | <i>Tigridia multiflora</i>                        | 19.9608333 |
| 670 Iridaceae   | <i>Tigridia multiflora</i>                        | 19.73      |
| 671 Iridaceae   | <i>Tigridia multiflora</i>                        | 20.1941667 |
| 672 Iridaceae   | <i>Tigridia multiflora</i>                        | 20.9441667 |
| 673 Iridaceae   | <i>Tigridia multiflora</i>                        | 19.7669444 |
| 674 Iridaceae   | <i>Tigridia multiflora</i>                        | 19.32      |
| 675 Iridaceae   | <i>Tigridia multiflora</i>                        | 23.0833333 |
| 676 Iridaceae   | <i>Tigridia multiflora</i>                        | 23.9602222 |
| 677 Iridaceae   | <i>Tigridia multiflora</i>                        | 21.7694444 |
| 678 Iridaceae   | <i>Tigridia multiflora</i>                        | 18.9366667 |
| 679 Iridaceae   | <i>Tigridia orthantha</i>                         | 17.4640611 |
| 680 Iridaceae   | <i>Tigridia potosina</i>                          | 22.0297222 |
| 681 Iridaceae   | <i>Tigridia pugana</i>                            | 20.3697    |
| 682 Iridaceae   | <i>Tigridia pugana</i>                            | 19.5852778 |
| 683 Iridaceae   | <i>Tigridia pulchella</i>                         | 19.666667  |
| 684 Iridaceae   | <i>Tigridia pulchella</i>                         | 19.485161  |
| 685 Iridaceae   | <i>Tigridia purpusii</i>                          | 18.522351  |
| 686 Iridaceae   | <i>Tigridia rzedowskiana</i>                      | 21.119294  |
| 687 Iridaceae   | <i>Tigridia seleriana</i>                         | 17.4430556 |
| 688 Iridaceae   | <i>Tigridia suarezii</i>                          | 20.05      |
| 689 Iridaceae   | <i>Tigridia suarezii</i>                          | 20         |
| 690 Iridaceae   | <i>Tigridia suarezii</i>                          | 20.3533333 |
| 691 Iridaceae   | <i>Tigridia tepoxtlana</i>                        | 19.0130556 |
| 692 Iridaceae   | <i>Tigridia tepoxtlana</i>                        | 18.9866667 |
| 693 Iridaceae   | <i>Tigridia vanhouttei</i>                        | 19.5275    |
| 694 Iridaceae   | <i>Tigridia vanhouttei</i>                        | 19.3275    |
| 695 Iridaceae   | <i>Tigridia vanhouttei</i>                        | 20.9275    |
| 696 Iridaceae   | <i>Tigridia vanhouttei</i>                        | 19.9108333 |
| 697 Iridaceae   | <i>Tigridia vanhouttei</i> spp. <i>vanhouttei</i> | 19.7811111 |
| 698 Iridaceae   | <i>Tigridia vanhouttei</i> spp. <i>vanhouttei</i> | 19.7797222 |
| 699 Iridaceae   | <i>Tigridia vanhouttei</i> spp. <i>roldanii</i>   | 19.0733333 |
| 700 Iridaceae   | <i>Tigridia vanhouttei</i> spp. <i>vanhouttei</i> | 20.42      |
| 701 Iridaceae   | <i>Tigridia vanhouttei</i> spp. <i>vanhouttei</i> | 17.51      |
| 702 Iridaceae   | <i>Tigridia vanhouttei</i> spp. <i>vanhouttei</i> | 19.5608333 |
| 703 Iridaceae   | <i>Tigridia venusta</i>                           | 19.6333333 |
| 704 Iridaceae   | <i>Tigridia venusta</i>                           | 19.6016667 |
| 705 Iridaceae   | <i>Rigidella inusitata</i>                        | 17.489881  |
| 706 Iridaceae   | <i>Trimezia steyermarkii</i>                      | 19.205373  |
| 707 Iridaceae   | <i>Trimezia steyermarkii</i>                      | 18.235     |
| 708 Iridaceae   | <i>Trimezia steyermarkii</i>                      | 17.1275    |
| 709 Iridaceae   | <i>Trimezia steyermarkii</i>                      | 17.4583333 |
| 710 Iridaceae   | <i>Trimezia steyermarkii</i>                      | 16.9083333 |
| 713 Orchidaceae | <i>Aulosepalum hemichrea</i>                      | 15.189     |
| 714 Orchidaceae | <i>Aulosepalum hemichrea</i>                      | 16.21      |

|     |             |                                        |            |
|-----|-------------|----------------------------------------|------------|
| 715 | Orchidaceae | Aulosepalum hemichrea                  | 17.093     |
| 716 | Orchidaceae | Aulosepalum pyramidale                 | 18.6333333 |
| 717 | Orchidaceae | Aulosepalum pyramidale                 | 19.5158333 |
| 718 | Orchidaceae | Brachystele chiangii                   | 25.1333333 |
| 719 | Orchidaceae | Brachystele chiangii                   | 25.0984167 |
| 720 | Orchidaceae | Brachystele chiangii                   | 24.1349167 |
| 721 | Orchidaceae | Brachystele polyantha                  | 24.3186111 |
| 722 | Orchidaceae | Brachystele polyantha                  | 24.578125  |
| 723 | Orchidaceae | Brachystele polyantha                  | 25.6038972 |
| 724 | Orchidaceae | Brachystele polyantha                  | 26.5027778 |
| 725 | Orchidaceae | Brachystele polyantha                  | 19.3133333 |
| 726 | Orchidaceae | Brachystele polyantha                  | 19.422987  |
| 727 | Orchidaceae | Brachystele polyantha                  | 17.5108333 |
| 728 | Orchidaceae | Brachystele polyantha                  | 18.3108333 |
| 729 | Orchidaceae | Corallorhiza bulbosa                   | 23.8030556 |
| 730 | Orchidaceae | Corallorhiza bulbosa                   | 20.0633333 |
| 731 | Orchidaceae | Corallorhiza bulbosa                   | 19.68      |
| 732 | Orchidaceae | Corallorhiza bulbosa                   | 21.2875    |
| 733 | Orchidaceae | Corallorhiza bulbosa                   | 20.2266667 |
| 734 | Orchidaceae | Corallorhiza ehrenbergii               | 17.2683333 |
| 735 | Orchidaceae | Corallorhiza ehrenbergii               | 21.1833333 |
| 736 | Orchidaceae | Corallorhiza ehrenbergii               | 19.4783333 |
| 737 | Orchidaceae | Corallorhiza ehrenbergii               | 20.1833333 |
| 738 | Orchidaceae | Corallorhiza macrantha                 | 16.840715  |
| 739 | Orchidaceae | Corallorhiza maculata var. mexicana    | 19.6422222 |
| 740 | Orchidaceae | Corallorhiza maculata var. mexicana    | 15.4305556 |
| 741 | Orchidaceae | Corallorhiza maculata var. mexicana    | 23.804075  |
| 742 | Orchidaceae | Corallorhiza maculata var. mexicana    | 16.1       |
| 743 | Orchidaceae | Corallorhiza odontorhiza var. pringlei | 28.3990083 |
| 744 | Orchidaceae | Corallorhiza odontorhiza var. pringlei | 19.4697222 |
| 745 | Orchidaceae | Corallorhiza odontorhiza var. pringlei | 16.58      |
| 746 | Orchidaceae | Corallorhiza odontorhiza var. pringlei | 16.85      |
| 747 | Orchidaceae | Corallorhiza striata var. involuta     | 27.1333333 |
| 748 | Orchidaceae | Corallorhiza striata var. involuta     | 24.5944444 |
| 749 | Orchidaceae | Corallorhiza striata var. involuta     | 17.7608333 |
| 750 | Orchidaceae | Corallorhiza striata var. vreelandii   | 23.835     |
| 751 | Orchidaceae | Corallorhiza williamsii                | 18.986407  |
| 752 | Orchidaceae | Corallorhiza wisteriana                | 16.4616667 |
| 753 | Orchidaceae | Corallorhiza wisteriana                | 16.5080556 |
| 754 | Orchidaceae | Corallorhiza wisteriana                | 25.6004389 |
| 755 | Orchidaceae | Corallorhiza wisteriana                | 25.1866667 |
| 756 | Orchidaceae | Cyclopogon pringlei                    | 18.77      |
| 757 | Orchidaceae | Cyclopogon saccatus                    | 18.813244  |
| 758 | Orchidaceae | Cyclopogon saccatus                    | 19.494953  |
| 759 | Orchidaceae | Cyclopogon saccatus                    | 19.6183333 |



|     |             |                                                 |            |
|-----|-------------|-------------------------------------------------|------------|
| 760 | Orchidaceae | <i>Cypripedium dickinsonianum</i>               | 16.21648   |
| 761 | Orchidaceae | <i>Cypripedium irapeanum</i>                    | 19.2775    |
| 762 | Orchidaceae | <i>Cypripedium irapeanum</i>                    | 19.443298  |
| 763 | Orchidaceae | <i>Cypripedium irapeanum</i>                    | 19.3441667 |
| 764 | Orchidaceae | <i>Cypripedium irapeanum</i>                    | 18.8858333 |
| 765 | Orchidaceae | <i>Cypripedium irapeanum</i>                    | 17.8941667 |
| 766 | Orchidaceae | <i>Cypripedium irapeanum</i>                    | 17.6275    |
| 767 | Orchidaceae | <i>Cypripedium irapeanum</i>                    | 16.9168833 |
| 768 | Orchidaceae | <i>Cypripedium irapeanum</i>                    | 16.2       |
| 769 | Orchidaceae | <i>Cypripedium irapeanum</i>                    | 18.9091667 |
| 770 | Orchidaceae | <i>Cypripedium irapeanum</i>                    | 19.2777778 |
| 771 | Orchidaceae | <i>Cypripedium irapeanum</i>                    | 20.43      |
| 772 | Orchidaceae | <i>Cypripedium irapeanum</i>                    | 18.85      |
| 773 | Orchidaceae | <i>Cypripedium molle</i>                        | 18.0441667 |
| 774 | Orchidaceae | <i>Cypripedium molle</i>                        | 17.9108333 |
| 775 | Orchidaceae | <i>Cypripedium molle</i>                        | 17.3608333 |
| 776 | Orchidaceae | <i>Cypripedium molle</i>                        | 17.7275    |
| 777 | Orchidaceae | <i>Cypripedium molle</i>                        | 17.5441667 |
| 778 | Orchidaceae | <i>Cypripedium molle</i>                        | 18.8497222 |
| 779 | Orchidaceae | <i>Cypripedium molle</i>                        | 17.8275    |
| 780 | Orchidaceae | <i>Cypripedium molle</i>                        | 16.9844389 |
| 781 | Orchidaceae | <i>Cypripedium molle</i>                        | 17.585     |
| 782 | Orchidaceae | <i>Deiregyne alinae</i>                         | 19.675     |
| 783 | Orchidaceae | <i>Deiregyne alinae</i>                         | 19.8716667 |
| 784 | Orchidaceae | <i>Deiregyne cochleata</i>                      | 20.528847  |
| 785 | Orchidaceae | <i>Deiregyne densiflora</i>                     | 18.05      |
| 786 | Orchidaceae | <i>Deiregyne densiflora</i>                     | 17.11389   |
| 787 | Orchidaceae | <i>Deiregyne densiflora</i>                     | 18.983     |
| 788 | Orchidaceae | <i>Deiregyne densiflora</i>                     | 18.25      |
| 789 | Orchidaceae | <i>Deiregyne densiflora</i>                     | 19.5875    |
| 790 | Orchidaceae | <i>Deiregyne densiflora</i>                     | 20.125     |
| 791 | Orchidaceae | <i>Deiregyne densiflora</i>                     | 21.5       |
| 792 | Orchidaceae | <i>Deiregyne densiflora</i>                     | 25.33      |
| 793 | Orchidaceae | <i>Deiregyne nelsonii</i> subsp. <i>pulchra</i> | 21.2216667 |
| 794 | Orchidaceae | <i>Deiregyne nelsonii</i>                       | 17.35      |
| 795 | Orchidaceae | <i>Deiregyne ramentacea</i>                     | 23.0461111 |
| 796 | Orchidaceae | <i>Deiregyne ramirezii</i>                      | 20.112909  |
| 797 | Orchidaceae | <i>Deiregyne rhombilabia</i>                    | 18.6108333 |
| 798 | Orchidaceae | <i>Deiregyne rhombilabia</i>                    | 18.9719444 |
| 799 | Orchidaceae | <i>Deiregyne sheviakiana</i>                    | 16.726062  |
| 800 | Orchidaceae | <i>Deiregyne tenorioi</i>                       | 18.05      |
| 801 | Orchidaceae | <i>Deiregyne tenuiflora</i>                     | 18.875     |
| 802 | Orchidaceae | <i>Deiregyne tenuiflora</i>                     | 18.7833333 |
| 803 | Orchidaceae | <i>Dichromanthus aurantiacus</i>                | 20.3441667 |
| 804 | Orchidaceae | <i>Dichromanthus aurantiacus</i>                | 19.5875    |

|     |             |                                   |            |
|-----|-------------|-----------------------------------|------------|
| 805 | Orchidaceae | <i>Dichromanthus aurantiacus</i>  | 16.6961111 |
| 806 | Orchidaceae | <i>Dichromanthus cinnabarinus</i> | 22.6608333 |
| 807 | Orchidaceae | <i>Dichromanthus cinnabarinus</i> | 19.5108333 |
| 808 | Orchidaceae | <i>Dichromanthus cinnabarinus</i> | 18.8463889 |
| 809 | Orchidaceae | <i>Dichromanthus cinnabarinus</i> | 19.342985  |
| 810 | Orchidaceae | <i>Dichromanthus cinnabarinus</i> | 25.4108333 |
| 811 | Orchidaceae | <i>Dichromanthus cinnabarinus</i> | 17.8000361 |
| 812 | Orchidaceae | <i>Dichromanthus cinnabarinus</i> | 17.5669167 |
| 813 | Orchidaceae | <i>Dichromanthus cinnabarinus</i> | 23.9291667 |
| 814 | Orchidaceae | <i>Dichromanthus cinnabarinus</i> | 25.3833333 |
| 815 | Orchidaceae | <i>Dichromanthus cinnabarinus</i> | 19.8166667 |
| 816 | Orchidaceae | <i>Dichromanthus cinnabarinus</i> | 19.3136111 |
| 817 | Orchidaceae | <i>Dichromanthus cinnabarinus</i> | 16.7566667 |
| 818 | Orchidaceae | <i>Dichromanthus cinnabarinus</i> | 19.0166667 |
| 819 | Orchidaceae | <i>Dichromanthus cinnabarinus</i> | 18.0608333 |
| 820 | Orchidaceae | <i>Dichromanthus cinnabarinus</i> | 25.0984167 |
| 821 | Orchidaceae | <i>Dichromanthus michuacanus</i>  | 17.5847    |
| 822 | Orchidaceae | <i>Dichromanthus michuacanus</i>  | 16.31556   |
| 823 | Orchidaceae | <i>Dichromanthus michuacanus</i>  | 18.75      |
| 824 | Orchidaceae | <i>Dichromanthus michuacanus</i>  | 18.967     |
| 825 | Orchidaceae | <i>Dichromanthus michuacanus</i>  | 18.8966667 |
| 826 | Orchidaceae | <i>Dichromanthus michuacanus</i>  | 18.9       |
| 827 | Orchidaceae | <i>Dichromanthus michuacanus</i>  | 19.588     |
| 828 | Orchidaceae | <i>Dichromanthus michuacanus</i>  | 19.02639   |
| 829 | Orchidaceae | <i>Dichromanthus michuacanus</i>  | 19.492     |
| 830 | Orchidaceae | <i>Dichromanthus michuacanus</i>  | 20.4933333 |
| 831 | Orchidaceae | <i>Dichromanthus michuacanus</i>  | 20.705     |
| 832 | Orchidaceae | <i>Dichromanthus michuacanus</i>  | 23.55      |
| 833 | Orchidaceae | <i>Dichromanthus michuacanus</i>  | 23.45278   |
| 834 | Orchidaceae | <i>Dichromanthus michuacanus</i>  | 27.972     |
| 835 | Orchidaceae | <i>Dichromanthus michuacanus</i>  | 28.008     |
| 836 | Orchidaceae | <i>Dichromanthus michuacanus</i>  | 28.40306   |
| 837 | Orchidaceae | <i>Funkiella laxispica</i>        | 17.050276  |
| 838 | Orchidaceae | <i>Funkiella parasitica</i>       | 16.5       |
| 839 | Orchidaceae | <i>Funkiella parasitica</i>       | 23.966667  |
| 840 | Orchidaceae | <i>Funkiella parasitica</i>       | 21.93      |
| 841 | Orchidaceae | <i>Funkiella rubrocallosa</i>     | 27.4325    |
| 842 | Orchidaceae | <i>Funkiella rubrocallosa</i>     | 27.0683333 |
| 843 | Orchidaceae | <i>Funkiella stolonifera</i>      | 15.115     |
| 844 | Orchidaceae | <i>Funkiella valerioi</i>         | 19.33      |
| 845 | Orchidaceae | <i>Galeoglossum cactorum</i>      | 17.113069  |
| 846 | Orchidaceae | <i>Galeoglossum tubulosum</i>     | 19.03      |
| 847 | Orchidaceae | <i>Galeoglossum tubulosum</i>     | 19.1       |
| 848 | Orchidaceae | <i>Galeottiella sarcoglossa</i>   | 20.8063889 |
| 849 | Orchidaceae | <i>Galeottiella sarcoglossa</i>   | 16.14      |

|     |             |                          |            |
|-----|-------------|--------------------------|------------|
| 850 | Orchidaceae | Galeottiella sarcoglossa | 19.13333   |
| 851 | Orchidaceae | Galeottiella sarcoglossa | 18.76666   |
| 852 | Orchidaceae | Habenaria agapitae       | 16.7353    |
| 853 | Orchidaceae | Habenaria clypeata       | 20.5275    |
| 854 | Orchidaceae | Habenaria clypeata       | 19.3441667 |
| 855 | Orchidaceae | Habenaria clypeata       | 19.8       |
| 856 | Orchidaceae | Habenaria clypeata       | 19.543641  |
| 857 | Orchidaceae | Habenaria clypeata       | 18.8497222 |
| 858 | Orchidaceae | Habenaria clypeata       | 20.8108333 |
| 859 | Orchidaceae | Habenaria clypeata       | 19.5383333 |
| 860 | Orchidaceae | Habenaria clypeata       | 21.3608333 |
| 861 | Orchidaceae | Habenaria clypeata       | 19.32      |
| 862 | Orchidaceae | Habenaria clypeata       | 19.1638889 |
| 863 | Orchidaceae | Habenaria clypeata       | 19.3425    |
| 864 | Orchidaceae | Habenaria clypeata       | 28.4194444 |
| 865 | Orchidaceae | Habenaria clypeata       | 17.2346889 |
| 866 | Orchidaceae | Habenaria clypeata       | 28.4952778 |
| 867 | Orchidaceae | Habenaria clypeata       | 23.8436111 |
| 868 | Orchidaceae | Habenaria clypeata       | 19.850725  |
| 869 | Orchidaceae | Habenaria clypeata       | 22.3557556 |
| 870 | Orchidaceae | Habenaria clypeata       | 20.0398556 |
| 871 | Orchidaceae | Habenaria clypeata       | 19.0166667 |
| 872 | Orchidaceae | Habenaria clypeata       | 23.471525  |
| 873 | Orchidaceae | Habenaria clypeata       | 25.8241667 |
| 874 | Orchidaceae | Habenaria filifera       | 19.8775    |
| 875 | Orchidaceae | Habenaria filifera       | 17.7713889 |
| 876 | Orchidaceae | Habenaria filifera       | 20.11      |
| 877 | Orchidaceae | Habenaria filifera       | 20.3805556 |
| 878 | Orchidaceae | Habenaria ixtlanensis    | 17.7941667 |
| 879 | Orchidaceae | Habenaria ixtlanensis    | 17.11      |
| 880 | Orchidaceae | Habenaria novemfida      | 16.99      |
| 881 | Orchidaceae | Habenaria novemfida      | 19.45      |
| 882 | Orchidaceae | Habenaria novemfida      | 19.2       |
| 883 | Orchidaceae | Habenaria novemfida      | 17.81666   |
| 884 | Orchidaceae | Habenaria novemfida      | 19.7       |
| 885 | Orchidaceae | Habenaria novemfida      | 19.6180556 |
| 886 | Orchidaceae | Habenaria novemfida      | 19.5       |
| 887 | Orchidaceae | Habenaria novemfida      | 18.91666   |
| 888 | Orchidaceae | Habenaria novemfida      | 21.43333   |
| 889 | Orchidaceae | Habenaria strictissima   | 16.73      |
| 890 | Orchidaceae | Habenaria strictissima   | 19.3       |
| 891 | Orchidaceae | Habenaria strictissima   | 21.39      |
| 892 | Orchidaceae | Habenaria strictissima   | 19.6180556 |
| 893 | Orchidaceae | Habenaria strictissima   | 18.73      |
| 894 | Orchidaceae | Habenaria virens         | 16.68      |

|     |             |                         |            |
|-----|-------------|-------------------------|------------|
| 895 | Orchidaceae | Habenaria virens        | 15.91666   |
| 896 | Orchidaceae | Hexalectris brevicaulis | 17.8       |
| 897 | Orchidaceae | Hexalectris brevicaulis | 18.467     |
| 898 | Orchidaceae | Hexalectris brevicaulis | 19.603     |
| 899 | Orchidaceae | Hexalectris brevicaulis | 20.867     |
| 900 | Orchidaceae | Hexalectris grandiflora | 17.447     |
| 901 | Orchidaceae | Hexalectris grandiflora | 18.94      |
| 902 | Orchidaceae | Hexalectris grandiflora | 18.65      |
| 903 | Orchidaceae | Hexalectris grandiflora | 19.933     |
| 904 | Orchidaceae | Hexalectris grandiflora | 19.463     |
| 905 | Orchidaceae | Hexalectris grandiflora | 23.5       |
| 906 | Orchidaceae | Hexalectris grandiflora | 23.97      |
| 907 | Orchidaceae | Hexalectris grandiflora | 25.3803056 |
| 908 | Orchidaceae | Hexalectris grandiflora | 27.1       |
| 909 | Orchidaceae | Hexalectris grandiflora | 28.28333   |
| 910 | Orchidaceae | Hexalectris nitida      | 24.683     |
| 911 | Orchidaceae | Hexalectris parviflora  | 21.351     |
| 912 | Orchidaceae | Hexalectris revoluta    | 24.695156  |
| 913 | Orchidaceae | Hexalectris warnockii   | 29.50886   |
| 914 | Orchidaceae | Liparis cordiformis     | 18.937     |
| 915 | Orchidaceae | Liparis cordiformis     | 19.418     |
| 916 | Orchidaceae | Liparis cordiformis     | 19.478     |
| 917 | Orchidaceae | Liparis draculoides     | 17.3       |
| 918 | Orchidaceae | Liparis draculoides     | 17.317     |
| 919 | Orchidaceae | Liparis draculoides     | 19.411     |
| 920 | Orchidaceae | Liparis draculoides     | 19.383     |
| 921 | Orchidaceae | Liparis draculoides     | 20.215     |
| 922 | Orchidaceae | Liparis greenwoodiana   | 18.95      |
| 923 | Orchidaceae | Liparis greenwoodiana   | 18.863     |
| 924 | Orchidaceae | Liparis greenwoodiana   | 18.983     |
| 925 | Orchidaceae | Liparis madrensis       | 23.9166667 |
| 926 | Orchidaceae | Liparis vexillifera     | 16.272     |
| 927 | Orchidaceae | Liparis vexillifera     | 16.656     |
| 928 | Orchidaceae | Liparis vexillifera     | 17.23      |
| 929 | Orchidaceae | Liparis vexillifera     | 18.905     |
| 930 | Orchidaceae | Liparis vexillifera     | 18.465     |
| 931 | Orchidaceae | Liparis vexillifera     | 19.6       |
| 932 | Orchidaceae | Liparis vexillifera     | 19.802     |
| 933 | Orchidaceae | Liparis vexillifera     | 20.501     |
| 934 | Orchidaceae | Liparis vexillifera     | 21.333     |
| 935 | Orchidaceae | Liparis vexillifera     | 21.11      |
| 936 | Orchidaceae | Liparis vexillifera     | 22.5       |
| 937 | Orchidaceae | Liparis vexillifera     | 23.247     |
| 938 | Orchidaceae | Liparis vexillifera     | 27.748     |
| 939 | Orchidaceae | Malaxis carnosa         | 16.03333   |

|     |             |                       |            |
|-----|-------------|-----------------------|------------|
| 940 | Orchidaceae | Malaxis carnosa       | 16.308     |
| 941 | Orchidaceae | Malaxis carnosa       | 18.15      |
| 942 | Orchidaceae | Malaxis carnosa       | 18.453     |
| 943 | Orchidaceae | Malaxis carnosa       | 19.7       |
| 944 | Orchidaceae | Malaxis carnosa       | 19.3       |
| 945 | Orchidaceae | Malaxis carnosa       | 24.167     |
| 946 | Orchidaceae | Malaxis carnosa       | 24.51667   |
| 947 | Orchidaceae | Malaxis greenwoodiana | 16.75      |
| 948 | Orchidaceae | Malaxis greenwoodiana | 17.2       |
| 949 | Orchidaceae | Malaxis hagsateri     | 17.525012  |
| 950 | Orchidaceae | Malaxis hagsateri     | 17.070411  |
| 951 | Orchidaceae | Malaxis javesiae      | 16.75      |
| 952 | Orchidaceae | Malaxis javesiae      | 17.833     |
| 953 | Orchidaceae | Malaxis myurus        | 16.1688889 |
| 954 | Orchidaceae | Malaxis myurus        | 18.983     |
| 955 | Orchidaceae | Malaxis myurus        | 19.34      |
| 956 | Orchidaceae | Malaxis myurus        | 19.669     |
| 957 | Orchidaceae | Malaxis myurus        | 20.367     |
| 958 | Orchidaceae | Malaxis myurus        | 20.343     |
| 959 | Orchidaceae | Malaxis myurus        | 22.525     |
| 960 | Orchidaceae | Malaxis myurus        | 22.32      |
| 961 | Orchidaceae | Malaxis myurus        | 23.526     |
| 962 | Orchidaceae | Malaxis myurus        | 26.47      |
| 963 | Orchidaceae | Malaxis myurus        | 28.413     |
| 964 | Orchidaceae | Malaxis novogaliciana | 21.072     |
| 965 | Orchidaceae | Malaxis novogaliciana | 22.135     |
| 966 | Orchidaceae | Malaxis novogaliciana | 23.45      |
| 967 | Orchidaceae | Malaxis rosilloi      | 16.248     |
| 968 | Orchidaceae | Malaxis rosilloi      | 18.967     |
| 969 | Orchidaceae | Malaxis urbana        | 18.4527778 |
| 970 | Orchidaceae | Mesadenus lucayanus   | 21.6344444 |
| 971 | Orchidaceae | Mesadenus tenuissimus | 17.4517    |
| 972 | Orchidaceae | Funkiella minutiflora | 15.427     |
| 973 | Orchidaceae | Funkiella minutiflora | 19.03      |
| 974 | Orchidaceae | Funkiella minutiflora | 19.08861   |
| 975 | Orchidaceae | Ponthieva mexicana    | 16.75      |
| 976 | Orchidaceae | Ponthieva mexicana    | 16.66      |
| 977 | Orchidaceae | Ponthieva mexicana    | 17.18      |
| 978 | Orchidaceae | Ponthieva mexicana    | 19.667     |
| 979 | Orchidaceae | Ponthieva mexicana    | 19.69      |
| 980 | Orchidaceae | Ponthieva mexicana    | 20.194     |
| 981 | Orchidaceae | Ponthieva mexicana    | 21.292     |
| 982 | Orchidaceae | Ponthieva mexicana    | 23.9786111 |
| 983 | Orchidaceae | Pelexia obliqua       | 18.58333   |
| 984 | Orchidaceae | Physogyne garayana    | 18.944351  |

|      |             |                               |            |
|------|-------------|-------------------------------|------------|
| 985  | Orchidaceae | <i>Ponthieva brittoniae</i>   | 18.81417   |
| 986  | Orchidaceae | <i>Ponthieva schaffneri</i>   | 16.17      |
| 987  | Orchidaceae | <i>Ponthieva schaffneri</i>   | 16.98      |
| 988  | Orchidaceae | <i>Ponthieva schaffneri</i>   | 17.42      |
| 989  | Orchidaceae | <i>Ponthieva schaffneri</i>   | 19.454414  |
| 990  | Orchidaceae | <i>Ponthieva schaffneri</i>   | 19.62      |
| 991  | Orchidaceae | <i>Ponthieva schaffneri</i>   | 19.218     |
| 992  | Orchidaceae | <i>Ponthieva schaffneri</i>   | 19.48      |
| 993  | Orchidaceae | <i>Ponthieva schaffneri</i>   | 19.468     |
| 994  | Orchidaceae | <i>Ponthieva schaffneri</i>   | 19.73      |
| 995  | Orchidaceae | <i>Ponthieva schaffneri</i>   | 21.155     |
| 996  | Orchidaceae | <i>Ponthieva schaffneri</i>   | 21.285     |
| 997  | Orchidaceae | <i>Ponthieva schaffneri</i>   | 23.9916667 |
| 998  | Orchidaceae | <i>Ponthieva schaffneri</i>   | 23.979     |
| 999  | Orchidaceae | <i>Ponthieva schaffneri</i>   | 27.748     |
| 1000 | Orchidaceae | <i>Pteroglossa roseoalba</i>  | 15.97611   |
| 1001 | Orchidaceae | <i>Pteroglossa roseoalba</i>  | 15.69      |
| 1002 | Orchidaceae | <i>Sacoila lanceolata</i>     | 15.96139   |
| 1003 | Orchidaceae | <i>Sacoila lanceolata</i>     | 16.414     |
| 1004 | Orchidaceae | <i>Sacoila lanceolata</i>     | 17.29444   |
| 1005 | Orchidaceae | <i>Sacoila lanceolata</i>     | 17.835     |
| 1006 | Orchidaceae | <i>Sacoila lanceolata</i>     | 17.77      |
| 1007 | Orchidaceae | <i>Sacoila lanceolata</i>     | 18.61      |
| 1008 | Orchidaceae | <i>Sacoila lanceolata</i>     | 18.967     |
| 1009 | Orchidaceae | <i>Sacoila lanceolata</i>     | 18.10333   |
| 1010 | Orchidaceae | <i>Sacoila lanceolata</i>     | 19.917     |
| 1011 | Orchidaceae | <i>Sacoila lanceolata</i>     | 19.938     |
| 1012 | Orchidaceae | <i>Sacoila lanceolata</i>     | 20.85      |
| 1013 | Orchidaceae | <i>Sacoila lanceolata</i>     | 21.7       |
| 1014 | Orchidaceae | <i>Sacoila lanceolata</i>     | 21.05      |
| 1015 | Orchidaceae | <i>Sacoila lanceolata</i>     | 21.222     |
| 1016 | Orchidaceae | <i>Sacoila lanceolata</i>     | 23.5       |
| 1017 | Orchidaceae | <i>Sacoila lanceolata</i>     | 26.812     |
| 1018 | Orchidaceae | <i>Sacoila lanceolata</i>     | 28.383     |
| 1019 | Orchidaceae | <i>Sarcoglottis assurgens</i> | 16.344     |
| 1020 | Orchidaceae | <i>Sarcoglottis assurgens</i> | 18.82      |
| 1021 | Orchidaceae | <i>Sarcoglottis assurgens</i> | 18.51583   |
| 1022 | Orchidaceae | <i>Sarcoglottis assurgens</i> | 19.562     |
| 1023 | Orchidaceae | <i>Sarcoglottis assurgens</i> | 22.13333   |
| 1024 | Orchidaceae | <i>Sarcoglottis cerina</i>    | 16.617     |
| 1025 | Orchidaceae | <i>Sarcoglottis cerina</i>    | 19.653     |
| 1026 | Orchidaceae | <i>Sarcoglottis corymbosa</i> | 16.7       |
| 1027 | Orchidaceae | <i>Sarcoglottis corymbosa</i> | 16.07      |
| 1028 | Orchidaceae | <i>Sarcoglottis corymbosa</i> | 20.5       |
| 1029 | Orchidaceae | <i>Sarcoglottis corymbosa</i> | 28.39444   |

|      |             |                          |            |
|------|-------------|--------------------------|------------|
| 1030 | Orchidaceae | Sarcoglottis schaffneri  | 16.717     |
| 1031 | Orchidaceae | Sarcoglottis schaffneri  | 17.31667   |
| 1032 | Orchidaceae | Sarcoglottis schaffneri  | 18.317     |
| 1033 | Orchidaceae | Sarcoglottis schaffneri  | 18.97      |
| 1034 | Orchidaceae | Sarcoglottis schaffneri  | 18.56667   |
| 1035 | Orchidaceae | Sarcoglottis schaffneri  | 19.25      |
| 1036 | Orchidaceae | Sarcoglottis schaffneri  | 19.31      |
| 1037 | Orchidaceae | Sarcoglottis schaffneri  | 19.02639   |
| 1038 | Orchidaceae | Sarcoglottis schaffneri  | 20.607     |
| 1039 | Orchidaceae | Sarcoglottis schaffneri  | 21.242     |
| 1040 | Orchidaceae | Sarcoglottis schaffneri  | 22.7       |
| 1041 | Orchidaceae | Sarcoglottis schaffneri  | 23.15      |
| 1042 | Orchidaceae | Sarcoglottis schaffneri  | 23.9786111 |
| 1043 | Orchidaceae | Sarcoglottis schaffneri  | 28.1       |
| 1044 | Orchidaceae | Sarcoglottis scintillans | 16.2667    |
| 1045 | Orchidaceae | Schiedeella affinis      | 17.62      |
| 1046 | Orchidaceae | Schiedeella affinis      | 18.983     |
| 1047 | Orchidaceae | Schiedeella affinis      | 19.2083    |
| 1048 | Orchidaceae | Schiedeella affinis      | 20.371     |
| 1049 | Orchidaceae | Schiedeella affinis      | 20.483     |
| 1050 | Orchidaceae | Schiedeella affinis      | 27.58333   |
| 1051 | Orchidaceae | Schiedeella albovaginata | 18.983     |
| 1052 | Orchidaceae | Schiedeella chartacea    | 19.7       |
| 1053 | Orchidaceae | Schiedeella crenulata    | 20.1833333 |
| 1054 | Orchidaceae | Schiedeella crenulata    | 21.151     |
| 1055 | Orchidaceae | Schiedeella diaphana     | 16.93      |
| 1056 | Orchidaceae | Schiedeella diaphana     | 18.13333   |
| 1057 | Orchidaceae | Schiedeella eriophora    | 16.1688889 |
| 1058 | Orchidaceae | Schiedeella eriophora    | 17.56      |
| 1059 | Orchidaceae | Schiedeella eriophora    | 19.46      |
| 1060 | Orchidaceae | Schiedeella eriophora    | 19.02      |
| 1061 | Orchidaceae | Schiedeella eriophora    | 19.018     |
| 1062 | Orchidaceae | Schiedeella eriophora    | 19.13333   |
| 1063 | Orchidaceae | Schiedeella eriophora    | 23.533     |
| 1064 | Orchidaceae | Schiedeella eriophora    | 23.9786111 |
| 1065 | Orchidaceae | Schiedeella eriophora    | 28.36667   |
| 1066 | Orchidaceae | Schiedeella eriophora    | 28.18333   |
| 1067 | Orchidaceae | Schiedeella falcata      | 16.78469   |
| 1068 | Orchidaceae | Schiedeella falcata      | 25.9       |
| 1069 | Orchidaceae | Schiedeella falcata      | 26.2       |
| 1070 | Orchidaceae | Schiedeella garayana     | 19.133     |
| 1071 | Orchidaceae | Schiedeella garayana     | 23.046     |
| 1072 | Orchidaceae | Schiedeella llaveana     | 19.067     |
| 1073 | Orchidaceae | Schiedeella nonantzin    | 20.301679  |
| 1074 | Orchidaceae | Schiedeella pandurata    | 25.9       |

|      |                |                               |           |
|------|----------------|-------------------------------|-----------|
| 1075 | Orchidaceae    | Schiedeella pseudopyramidalis | 16.98333  |
| 1076 | Orchidaceae    | Schiedeella pseudopyramidalis | 17.18     |
| 1077 | Orchidaceae    | Schiedella sparsiflora        | 18.92     |
| 1078 | Orchidaceae    | Schiedella sparsiflora        | 18.917    |
| 1079 | Orchidaceae    | Schiedella sparsiflora        | 18.6      |
| 1080 | Orchidaceae    | Schiedeella trilineata        | 16.15     |
| 1081 | Orchidaceae    | Schiedeella velata            | 29.922238 |
| 1082 | Orchidaceae    | Schiedeella violacea          | 15.86667  |
| 1083 | Orchidaceae    | Schiedeella violacea          | 15.946    |
| 1084 | Orchidaceae    | Sotoa confusa                 | 17.56167  |
| 1085 | Orchidaceae    | Sotoa confusa                 | 18.23333  |
| 1086 | Orchidaceae    | Sotoa confusa                 | 19.832    |
| 1087 | Orchidaceae    | Sotoa confusa                 | 19.35     |
| 1088 | Orchidaceae    | Sotoa confusa                 | 22.72444  |
| 1089 | Orchidaceae    | Beloglottis costaricensis     | 15.98028  |
| 1090 | Orchidaceae    | Beloglottis costaricensis     | 16.5      |
| 1091 | Orchidaceae    | Beloglottis costaricensis     | 16.087    |
| 1092 | Orchidaceae    | Beloglottis costaricensis     | 18.42806  |
| 1093 | Orchidaceae    | Beloglottis costaricensis     | 20.1      |
| 1094 | Orchidaceae    | Beloglottis costaricensis     | 21.25     |
| 1095 | Orchidaceae    | Beloglottis costaricensis     | 22.5      |
| 1096 | Orchidaceae    | Stenorrhynchos sulphureum     | 18.962    |
| 1097 | Orchidaceae    | Wulschlaegelia aphylla        | 16.95     |
| 1098 | Orchidaceae    | Wulschlaegelia aphylla        | 17.233    |
| 1100 | Amaryllidaceae | Zephyranthes verecunda        | 18.698    |
| 1101 | Amaryllidaceae | Zephyranthes verecunda        | 19.618    |
| 1102 | Amaryllidaceae | Zephyranthes verecunda        | 19.207    |
| 1103 | Amaryllidaceae | Zephyranthes verecunda        | 19.277    |
| 1104 | Amaryllidaceae | Zephyranthes verecunda        | 19.322    |
| 1105 | Amaryllidaceae | Zephyranthes verecunda        | 20.017    |
| 1106 | Liliaceae      | Calochortus ambiguus          | 31.30528  |
| 1107 | Liliaceae      | Calochortus balsensis         | 17.23     |
| 1108 | Liliaceae      | Calochortus balsensis         | 17.28     |
| 1109 | Liliaceae      | Calochortus barbatus          | 16.468    |
| 1110 | Liliaceae      | Calochortus barbatus          | 19.95     |
| 1111 | Liliaceae      | Calochortus barbatus          | 18.204    |
| 1112 | Liliaceae      | Calochortus barbatus          | 18.905    |
| 1113 | Liliaceae      | Calochortus barbatus          | 18.7      |
| 1114 | Liliaceae      | Calochortus barbatus          | 19.992    |
| 1115 | Liliaceae      | Calochortus barbatus          | 19.38     |
| 1116 | Liliaceae      | Calochortus barbatus          | 19.92     |
| 1117 | Liliaceae      | Calochortus barbatus          | 19.561    |
| 1118 | Liliaceae      | Calochortus barbatus          | 20.508    |
| 1119 | Liliaceae      | Calochortus barbatus          | 20.805    |
| 1120 | Liliaceae      | Calochortus barbatus          | 20.783    |



|      |           |                           |            |
|------|-----------|---------------------------|------------|
| 1121 | Liliaceae | Calochortus barbatus      | 21.35      |
| 1122 | Liliaceae | Calochortus barbatus      | 21.658     |
| 1123 | Liliaceae | Calochortus barbatus      | 23.422     |
| 1124 | Liliaceae | Calochortus barbatus      | 23.437     |
| 1125 | Liliaceae | Calochortus barbatus      | 27.19      |
| 1126 | Liliaceae | Calochortus barbatus      | 29.687     |
| 1127 | Liliaceae | Calochortus cernuus       | 18.982     |
| 1128 | Liliaceae | Calochortus cernuus       | 19.853     |
| 1129 | Liliaceae | Calochortus cernuus       | 20.882     |
| 1130 | Liliaceae | Calochortus concolor      | 32         |
| 1131 | Liliaceae | Calochortus exilis        | 18.95      |
| 1132 | Liliaceae | Calochortus exilis        | 20.297     |
| 1133 | Liliaceae | Calochortus exilis        | 22.913     |
| 1134 | Liliaceae | Calochortus exilis        | 23         |
| 1135 | Liliaceae | Calochortus exilis        | 28.6635    |
| 1136 | Liliaceae | Calochortus foliosus      | 19.51      |
| 1137 | Liliaceae | Calochortus fuscus        | 18.85      |
| 1138 | Liliaceae | Calochortus fuscus        | 18.987     |
| 1139 | Liliaceae | Calochortus fuscus        | 19.818     |
| 1140 | Liliaceae | Calochortus fuscus        | 20.55      |
| 1141 | Liliaceae | Calochortus fuscus        | 23.7       |
| 1142 | Liliaceae | Calochortus fuscus        | 25.35      |
| 1143 | Liliaceae | Calochortus fuscus        | 28.4448333 |
| 1144 | Liliaceae | Calochortus ghiesbreghtii | 16.567     |
| 1145 | Liliaceae | Calochortus ghiesbreghtii | 21.03      |
| 1146 | Liliaceae | Calochortus ghiesbreghtii | 23         |
| 1147 | Liliaceae | Calochortus hartwegii     | 20.72      |
| 1148 | Liliaceae | Calochortus hartwegii     | 21.333     |
| 1149 | Liliaceae | Calochortus hartwegii     | 21.35      |
| 1150 | Liliaceae | Calochortus hartwegii     | 21.962     |
| 1151 | Liliaceae | Calochortus marcellae     | 23.9786111 |
| 1152 | Liliaceae | Calochortus marcellae     | 24.8311111 |
| 1153 | Liliaceae | Calochortus marcellae     | 24         |
| 1154 | Liliaceae | Calochortus marcellae     | 25.429     |
| 1155 | Liliaceae | Calochortus mendozae      | 22.1916667 |
| 1156 | Liliaceae | Calochortus hintonii      | 18.972     |
| 1157 | Liliaceae | Calochortus hintonii      | 20.55      |
| 1158 | Liliaceae | Calochortus nigrescens    | 23         |
| 1159 | Liliaceae | Calochortus pringlei      | 18.987     |
| 1160 | Liliaceae | Calochortus pringlei      | 18.648     |
| 1161 | Liliaceae | Calochortus pringlei      | 19.05      |
| 1162 | Liliaceae | Calochortus purpureus     | 18.937     |
| 1163 | Liliaceae | Calochortus purpureus     | 19.678     |
| 1164 | Liliaceae | Calochortus purpureus     | 19.588     |
| 1165 | Liliaceae | Calochortus purpureus     | 19.858     |

|      |              |                        |            |
|------|--------------|------------------------|------------|
| 1166 | Liliaceae    | Calochortus purpureus  | 20.283     |
| 1167 | Liliaceae    | Calochortus purpureus  | 23.145     |
| 1168 | Liliaceae    | Calochortus purpureus  | 23.416     |
| 1169 | Liliaceae    | Calochortus spatulatus | 17.6402778 |
| 1170 | Liliaceae    | Calochortus spatulatus | 18.68      |
| 1171 | Liliaceae    | Calochortus spatulatus | 19.913     |
| 1172 | Liliaceae    | Calochortus spatulatus | 19.04      |
| 1173 | Liliaceae    | Calochortus spatulatus | 21.58      |
| 1174 | Liliaceae    | Calochortus spatulatus | 21.05      |
| 1175 | Liliaceae    | Calochortus spatulatus | 27.3       |
| 1176 | Liliaceae    | Calochortus spatulatus | 28.20833   |
| 1177 | Liliaceae    | Calochortus splendens  | 30.97      |
| 1178 | Liliaceae    | Calochortus splendens  | 31.5       |
| 1179 | Liliaceae    | Calochortus venustulus | 19.03      |
| 1180 | Liliaceae    | Calochortus venustulus | 20.525     |
| 1181 | Liliaceae    | Calochortus venustulus | 21.383     |
| 1182 | Liliaceae    | Calochortus venustulus | 23.881694  |
| 1183 | Liliaceae    | Calochortus venustulus | 26.57      |
| 1184 | Liliaceae    | Calochortus venustulus | 27.323     |
| 1185 | Liliaceae    | Calochortus weedii     | 30         |
| 1186 | Liliaceae    | Calochortus weedii     | 31.083     |
| 1187 | Liliaceae    | Calochortus weedii     | 32.433     |
| 1193 | Liliaceae    | Lilium parryi          | 30.95      |
| 1194 | Marantaceae  | Maranta gibba          | 17.9333333 |
| 1195 | Marantaceae  | Maranta gibba          | 17.0341666 |
| 1196 | Marantaceae  | Maranta gibba          | 18.2166667 |
| 1197 | Marantaceae  | Maranta gibba          | 21.2       |
| 1198 | Marantaceae  | Maranta gibba          | 17.53      |
| 1199 | Marantaceae  | Maranta gibba          | 18.45      |
| 1200 | Marantaceae  | Maranta gibba          | 20.6458333 |
| 1203 | Araceae      | Arisaema macrospathum  | 19.45      |
| 1204 | Araceae      | Arisaema macrospathum  | 20.96      |
| 1205 | Araceae      | Arisaema macrospathum  | 19.92      |
| 1206 | Araceae      | Arisaema macrospathum  | 19.05      |
| 1207 | Araceae      | Arisaema macrospathum  | 19.65      |
| 1208 | Araceae      | Arisaema macrospathum  | 18.91      |
| 1209 | Araceae      | Arisaema macrospathum  | 20.97      |
| 1210 | Araceae      | Arisaema macrospathum  | 25.36      |
| 1211 | Araceae      | Arisaema macrospathum  | 21.24      |
| 1212 | Araceae      | Arisaema macrospathum  | 23.54      |
| 1213 | Araceae      | Arisaema macrospathum  | 23.04      |
| 1214 | Araceae      | Arisaema macrospathum  | 18.83      |
| 1216 | Asparagaceae | Bessera elegans        | 19.05      |
| 1217 | Asparagaceae | Bessera elegans        | 20.6166667 |
| 1218 | Asparagaceae | Bessera elegans        | 19.4333333 |

|      |              |                          |            |
|------|--------------|--------------------------|------------|
| 1219 | Asparagaceae | Bessera elegans          | 18.3       |
| 1220 | Asparagaceae | Bessera elegans          | 20.5466667 |
| 1221 | Asparagaceae | Bessera elegans          | 19.65      |
| 1222 | Asparagaceae | Bessera elegans          | 20.3241667 |
| 1223 | Asparagaceae | Bessera elegans          | 20.7166667 |
| 1224 | Asparagaceae | Bessera elegans          | 20.3166667 |
| 1225 | Asparagaceae | Bessera elegans          | 20.8       |
| 1226 | Asparagaceae | Bessera elegans          | 19.2616667 |
| 1227 | Asparagaceae | Bessera elegans          | 19.4555556 |
| 1228 | Asparagaceae | Bessera elegans          | 18.9666667 |
| 1229 | Asparagaceae | Bessera elegans          | 21.3219444 |
| 1230 | Asparagaceae | Bessera elegans          | 21.2366667 |
| 1231 | Asparagaceae | Bessera elegans          | 16.9763889 |
| 1232 | Asparagaceae | Bessera tenuiflora       | 24.25      |
| 1233 | Asparagaceae | Bessera tenuiflora       | 23.4327778 |
| 1235 | Asparagaceae | Dandya balsensis         | 18.465     |
| 1236 | Asparagaceae | Dandya balsensis         | 18.625     |
| 1237 | Asparagaceae | Dandya balsensis         | 18.5266667 |
| 1238 | Asparagaceae | Jaimehintonia gypsophila | 24.1033333 |
| 1239 | Asparagaceae | Milla biflora            | 18.983     |
| 1240 | Asparagaceae | Milla biflora            | 18.983334  |
| 1241 | Asparagaceae | Milla biflora            | 31.23889   |
| 1242 | Asparagaceae | Milla biflora            | 21.763     |
| 1243 | Asparagaceae | Milla biflora            | 21.763334  |
| 1244 | Asparagaceae | Milla biflora            | 20.154     |
| 1245 | Asparagaceae | Milla biflora            | 20.154167  |
| 1246 | Asparagaceae | Milla biflora            | 20.86861   |
| 1247 | Asparagaceae | Milla biflora            | 20.869     |
| 1248 | Asparagaceae | Milla biflora            | 18.85      |
| 1249 | Asparagaceae | Milla biflora            | 18.856667  |
| 1250 | Asparagaceae | Milla biflora            | 18.857     |
| 1251 | Asparagaceae | Milla biflora            | 20.25      |
| 1252 | Asparagaceae | Milla biflora            | 20.25      |
| 1253 | Asparagaceae | Milla biflora            | 19.046667  |
| 1254 | Asparagaceae | Milla biflora            | 19.047     |
| 1255 | Asparagaceae | Milla biflora            | 21.497     |
| 1256 | Asparagaceae | Milla biflora            | 21.433     |
| 1257 | Asparagaceae | Milla biflora            | 21.433332  |
| 1258 | Asparagaceae | Milla biflora            | 19.213055  |
| 1259 | Asparagaceae | Milla biflora            | 19.552778  |
| 1260 | Asparagaceae | Milla biflora            | 19.798     |
| 1261 | Asparagaceae | Milla biflora            | 19.798334  |
| 1262 | Asparagaceae | Milla biflora            | 19.833     |
| 1263 | Asparagaceae | Milla biflora            | 30.695     |
| 1264 | Asparagaceae | Milla biflora            | 21.072     |

|      |              |               |           |
|------|--------------|---------------|-----------|
| 1265 | Asparagaceae | Milla biflora | 21.0725   |
| 1266 | Asparagaceae | Milla biflora | 18.15     |
| 1267 | Asparagaceae | Milla biflora | 19.745    |
| 1268 | Asparagaceae | Milla biflora | 19.745    |
| 1269 | Asparagaceae | Milla biflora | 19.571945 |
| 1270 | Asparagaceae | Milla biflora | 19.61861  |
| 1271 | Asparagaceae | Milla biflora | 19.635279 |
| 1272 | Asparagaceae | Milla biflora | 18.68     |
| 1273 | Asparagaceae | Milla biflora | 18.77     |
| 1274 | Asparagaceae | Milla biflora | 18.678    |
| 1275 | Asparagaceae | Milla biflora | 18.678333 |
| 1276 | Asparagaceae | Milla biflora | 19.821667 |
| 1277 | Asparagaceae | Milla biflora | 19.822    |
| 1278 | Asparagaceae | Milla biflora | 20.901    |
| 1279 | Asparagaceae | Milla biflora | 20.902    |
| 1280 | Asparagaceae | Milla biflora | 20.718    |
| 1281 | Asparagaceae | Milla biflora | 20.718334 |
| 1282 | Asparagaceae | Milla biflora | 19.81     |
| 1283 | Asparagaceae | Milla biflora | 23.422    |
| 1284 | Asparagaceae | Milla biflora | 23.561    |
| 1285 | Asparagaceae | Milla biflora | 19.33     |
| 1286 | Asparagaceae | Milla biflora | 19.367    |
| 1287 | Asparagaceae | Milla biflora | 19.367    |
| 1288 | Asparagaceae | Milla biflora | 19.367222 |
| 1289 | Asparagaceae | Milla biflora | 19.304167 |
| 1290 | Asparagaceae | Milla biflora | 19.30611  |
| 1291 | Asparagaceae | Milla biflora | 22.434    |
| 1292 | Asparagaceae | Milla biflora | 18.936666 |
| 1293 | Asparagaceae | Milla biflora | 18.937    |
| 1294 | Asparagaceae | Milla biflora | 18.967    |
| 1295 | Asparagaceae | Milla biflora | 18.967    |
| 1296 | Asparagaceae | Milla biflora | 18.967    |
| 1297 | Asparagaceae | Milla biflora | 18.975    |
| 1298 | Asparagaceae | Milla biflora | 28.24     |
| 1299 | Asparagaceae | Milla biflora | 28.135    |
| 1300 | Asparagaceae | Milla biflora | 28.135    |
| 1301 | Asparagaceae | Milla biflora | 21.111666 |
| 1302 | Asparagaceae | Milla biflora | 21.112    |
| 1303 | Asparagaceae | Milla biflora | 23.417    |
| 1304 | Asparagaceae | Milla biflora | 23.45     |
| 1305 | Asparagaceae | Milla biflora | 23.902    |
| 1306 | Asparagaceae | Milla biflora | 23.907    |
| 1307 | Asparagaceae | Milla biflora | 23.91     |
| 1308 | Asparagaceae | Milla biflora | 24.03     |
| 1309 | Asparagaceae | Milla biflora | 24.703    |

|      |              |               |           |
|------|--------------|---------------|-----------|
| 1310 | Asparagaceae | Milla biflora | 24.703333 |
| 1311 | Asparagaceae | Milla biflora | 19.574722 |
| 1312 | Asparagaceae | Milla biflora | 17.856667 |
| 1313 | Asparagaceae | Milla biflora | 17.857    |
| 1314 | Asparagaceae | Milla biflora | 19.45     |
| 1315 | Asparagaceae | Milla biflora | 19.523    |
| 1316 | Asparagaceae | Milla biflora | 19.523333 |
| 1317 | Asparagaceae | Milla biflora | 19.671667 |
| 1318 | Asparagaceae | Milla biflora | 19.672    |
| 1319 | Asparagaceae | Milla biflora | 20.74     |
| 1320 | Asparagaceae | Milla biflora | 23.184    |
| 1321 | Asparagaceae | Milla biflora | 22.57     |
| 1322 | Asparagaceae | Milla biflora | 22.584    |
| 1323 | Asparagaceae | Milla biflora | 23.973    |
| 1324 | Asparagaceae | Milla biflora | 23.973333 |
| 1325 | Asparagaceae | Milla biflora | 19.818    |
| 1326 | Asparagaceae | Milla biflora | 19.818333 |
| 1327 | Asparagaceae | Milla biflora | 21.086    |
| 1328 | Asparagaceae | Milla biflora | 21.14     |
| 1329 | Asparagaceae | Milla biflora | 19.524445 |
| 1330 | Asparagaceae | Milla biflora | 19.532223 |
| 1331 | Asparagaceae | Milla biflora | 19.855    |
| 1332 | Asparagaceae | Milla biflora | 19.895    |
| 1333 | Asparagaceae | Milla biflora | 19.895    |
| 1334 | Asparagaceae | Milla biflora | 19.895    |
| 1335 | Asparagaceae | Milla biflora | 19.831667 |
| 1336 | Asparagaceae | Milla biflora | 19.832    |
| 1337 | Asparagaceae | Milla biflora | 19.88861  |
| 1338 | Asparagaceae | Milla biflora | 22.25     |
| 1339 | Asparagaceae | Milla biflora | 22.25     |
| 1340 | Asparagaceae | Milla biflora | 19.561388 |
| 1341 | Asparagaceae | Milla biflora | 19.328056 |
| 1342 | Asparagaceae | Milla biflora | 21.405    |
| 1343 | Asparagaceae | Milla biflora | 21.405    |
| 1344 | Asparagaceae | Milla biflora | 18.716667 |
| 1345 | Asparagaceae | Milla biflora | 18.717    |
| 1346 | Asparagaceae | Milla biflora | 22.707    |
| 1347 | Asparagaceae | Milla biflora | 22.713    |
| 1348 | Asparagaceae | Milla biflora | 22.728    |
| 1349 | Asparagaceae | Milla biflora | 19.991667 |
| 1350 | Asparagaceae | Milla biflora | 19.992    |
| 1351 | Asparagaceae | Milla biflora | 20.0      |
| 1352 | Asparagaceae | Milla biflora | 18.88     |
| 1353 | Asparagaceae | Milla biflora | 18.88     |
| 1354 | Asparagaceae | Milla biflora | 20.283    |

|      |              |               |           |
|------|--------------|---------------|-----------|
| 1355 | Asparagaceae | Milla biflora | 20.317    |
| 1356 | Asparagaceae | Milla biflora | 20.338    |
| 1357 | Asparagaceae | Milla biflora | 20.366667 |
| 1358 | Asparagaceae | Milla biflora | 20.367    |
| 1359 | Asparagaceae | Milla biflora | 20.367    |
| 1360 | Asparagaceae | Milla biflora | 21.335    |
| 1361 | Asparagaceae | Milla biflora | 21.343    |
| 1362 | Asparagaceae | Milla biflora | 21.347    |
| 1363 | Asparagaceae | Milla biflora | 21.347    |
| 1364 | Asparagaceae | Milla biflora | 21.349    |
| 1365 | Asparagaceae | Milla biflora | 21.35     |
| 1366 | Asparagaceae | Milla biflora | 21.354    |
| 1367 | Asparagaceae | Milla biflora | 21.358    |
| 1368 | Asparagaceae | Milla biflora | 17.27     |
| 1369 | Asparagaceae | Milla biflora | 21.268    |
| 1370 | Asparagaceae | Milla biflora | 21.361666 |
| 1371 | Asparagaceae | Milla biflora | 21.362    |
| 1372 | Asparagaceae | Milla biflora | 21.118334 |
| 1373 | Asparagaceae | Milla biflora | 29.237    |
| 1374 | Asparagaceae | Milla biflora | 19.255556 |
| 1375 | Asparagaceae | Milla biflora | 18.817    |
| 1376 | Asparagaceae | Milla biflora | 20.501    |
| 1377 | Asparagaceae | Milla biflora | 19.913334 |
| 1378 | Asparagaceae | Milla biflora | 22.96     |
| 1379 | Asparagaceae | Milla biflora | 22.96     |
| 1380 | Asparagaceae | Milla biflora | 22.983    |
| 1381 | Asparagaceae | Milla biflora | 16.3      |
| 1382 | Asparagaceae | Milla biflora | 16.3      |
| 1383 | Asparagaceae | Milla biflora | 20.129723 |
| 1384 | Asparagaceae | Milla biflora | 20.131    |
| 1385 | Asparagaceae | Milla biflora | 18.663334 |
| 1386 | Asparagaceae | Milla biflora | 19.6      |
| 1387 | Asparagaceae | Milla biflora | 19.63     |
| 1388 | Asparagaceae | Milla biflora | 19.73     |
| 1389 | Asparagaceae | Milla biflora | 28.442    |
| 1390 | Asparagaceae | Milla biflora | 21.163    |
| 1391 | Asparagaceae | Milla biflora | 21.172    |
| 1392 | Asparagaceae | Milla biflora | 19.476389 |
| 1393 | Asparagaceae | Milla biflora | 22.18     |
| 1394 | Asparagaceae | Milla biflora | 19.778889 |
| 1395 | Asparagaceae | Milla biflora | 17.59     |
| 1396 | Asparagaceae | Milla biflora | 23.885    |
| 1397 | Asparagaceae | Milla biflora | 19.35     |
| 1398 | Asparagaceae | Milla biflora | 16.79     |
| 1399 | Asparagaceae | Milla biflora | 19.707222 |

|      |              |               |           |
|------|--------------|---------------|-----------|
| 1400 | Asparagaceae | Milla biflora | 20.125    |
| 1401 | Asparagaceae | Milla biflora | 20.134    |
| 1402 | Asparagaceae | Milla biflora | 18.316668 |
| 1403 | Asparagaceae | Milla biflora | 18.317    |
| 1404 | Asparagaceae | Milla biflora | 19.54     |
| 1405 | Asparagaceae | Milla biflora | 19.565    |
| 1406 | Asparagaceae | Milla biflora | 21.053    |
| 1407 | Asparagaceae | Milla biflora | 21.053333 |
| 1408 | Asparagaceae | Milla biflora | 18.75     |
| 1409 | Asparagaceae | Milla biflora | 21.886    |
| 1410 | Asparagaceae | Milla biflora | 23.668333 |
| 1411 | Asparagaceae | Milla biflora | 23.883    |
| 1412 | Asparagaceae | Milla biflora | 20.591667 |
| 1413 | Asparagaceae | Milla biflora | 20.592    |
| 1414 | Asparagaceae | Milla biflora | 29.33278  |
| 1415 | Asparagaceae | Milla biflora | 23.609    |
| 1416 | Asparagaceae | Milla biflora | 20.283    |
| 1417 | Asparagaceae | Milla biflora | 21.552    |
| 1418 | Asparagaceae | Milla biflora | 21.326944 |
| 1419 | Asparagaceae | Milla biflora | 21.327    |
| 1420 | Asparagaceae | Milla biflora | 21.548    |
| 1421 | Asparagaceae | Milla biflora | 21.548334 |
| 1422 | Asparagaceae | Milla biflora | 21.708    |
| 1423 | Asparagaceae | Milla biflora | 21.708334 |
| 1424 | Asparagaceae | Milla biflora | 19.78     |
| 1425 | Asparagaceae | Milla biflora | 24.242    |
| 1426 | Asparagaceae | Milla biflora | 22.134722 |
| 1427 | Asparagaceae | Milla biflora | 20.998    |
| 1428 | Asparagaceae | Milla biflora | 20.998333 |
| 1429 | Asparagaceae | Milla biflora | 21.072    |
| 1430 | Asparagaceae | Milla biflora | 17.677    |
| 1431 | Asparagaceae | Milla biflora | 17.815    |
| 1432 | Asparagaceae | Milla biflora | 20.3      |
| 1433 | Asparagaceae | Milla biflora | 21.19     |
| 1434 | Asparagaceae | Milla biflora | 21.2225   |
| 1435 | Asparagaceae | Milla biflora | 21.501667 |
| 1436 | Asparagaceae | Milla biflora | 21.502    |
| 1437 | Asparagaceae | Milla biflora | 22.121    |
| 1438 | Asparagaceae | Milla biflora | 22.1575   |
| 1439 | Asparagaceae | Milla biflora | 22.158    |
| 1440 | Asparagaceae | Milla biflora | 21.933    |
| 1441 | Asparagaceae | Milla biflora | 16.735556 |
| 1442 | Asparagaceae | Milla biflora | 19.083    |
| 1443 | Asparagaceae | Milla biflora | 19.132    |
| 1444 | Asparagaceae | Milla biflora | 31.307    |

|      |              |               |           |
|------|--------------|---------------|-----------|
| 1445 | Asparagaceae | Milla biflora | 31.26564  |
| 1446 | Asparagaceae | Milla biflora | 31.32056  |
| 1447 | Asparagaceae | Milla biflora | 16.726667 |
| 1448 | Asparagaceae | Milla biflora | 16.727    |
| 1449 | Asparagaceae | Milla biflora | 17.867    |
| 1450 | Asparagaceae | Milla biflora | 24.983    |
| 1451 | Asparagaceae | Milla biflora | 24.99     |
| 1452 | Asparagaceae | Milla biflora | 24.99     |
| 1453 | Asparagaceae | Milla biflora | 21.081667 |
| 1454 | Asparagaceae | Milla biflora | 21.082    |
| 1455 | Asparagaceae | Milla biflora | 23.756    |
| 1456 | Asparagaceae | Milla biflora | 23.0      |
| 1457 | Asparagaceae | Milla biflora | 23.331    |
| 1458 | Asparagaceae | Milla biflora | 23.409    |
| 1459 | Asparagaceae | Milla biflora | 23.417    |
| 1460 | Asparagaceae | Milla biflora | 23.45     |
| 1461 | Asparagaceae | Milla biflora | 23.45     |
| 1462 | Asparagaceae | Milla biflora | 23.62     |
| 1463 | Asparagaceae | Milla biflora | 23.620277 |
| 1464 | Asparagaceae | Milla biflora | 23.0      |
| 1465 | Asparagaceae | Milla biflora | 19.245    |
| 1466 | Asparagaceae | Milla biflora | 19.356    |
| 1467 | Asparagaceae | Milla biflora | 19.933    |
| 1468 | Asparagaceae | Milla biflora | 19.945    |
| 1469 | Asparagaceae | Milla biflora | 19.471666 |
| 1470 | Asparagaceae | Milla biflora | 19.472    |
| 1471 | Asparagaceae | Milla biflora | 18.84     |
| 1472 | Asparagaceae | Milla biflora | 19.03     |
| 1473 | Asparagaceae | Milla biflora | 18.985    |
| 1474 | Asparagaceae | Milla biflora | 18.683    |
| 1475 | Asparagaceae | Milla biflora | 19.783    |
| 1476 | Asparagaceae | Milla biflora | 19.838055 |
| 1477 | Asparagaceae | Milla biflora | 19.8425   |
| 1478 | Asparagaceae | Milla biflora | 20.763056 |
| 1479 | Asparagaceae | Milla biflora | 21.155    |
| 1480 | Asparagaceae | Milla biflora | 19.695555 |
| 1481 | Asparagaceae | Milla biflora | 19.731945 |
| 1482 | Asparagaceae | Milla biflora | 19.7575   |
| 1483 | Asparagaceae | Milla biflora | 19.7575   |
| 1484 | Asparagaceae | Milla biflora | 18.983    |
| 1485 | Asparagaceae | Milla biflora | 19.446667 |
| 1486 | Asparagaceae | Milla biflora | 19.449444 |
| 1487 | Asparagaceae | Milla biflora | 19.496666 |
| 1488 | Asparagaceae | Milla biflora | 19.567778 |
| 1489 | Asparagaceae | Milla biflora | 19.858334 |



|      |              |               |           |
|------|--------------|---------------|-----------|
| 1490 | Asparagaceae | Milla biflora | 19.3      |
| 1491 | Asparagaceae | Milla biflora | 19.208334 |
| 1492 | Asparagaceae | Milla biflora | 26.578    |
| 1493 | Asparagaceae | Milla biflora | 19.58     |
| 1494 | Asparagaceae | Milla biflora | 19.29     |
| 1495 | Asparagaceae | Milla biflora | 19.29     |
| 1496 | Asparagaceae | Milla biflora | 19.311945 |
| 1497 | Asparagaceae | Milla biflora | 19.3425   |
| 1498 | Asparagaceae | Milla biflora | 18.375    |
| 1499 | Asparagaceae | Milla biflora | 18.414    |
| 1500 | Asparagaceae | Milla biflora | 19.995    |
| 1501 | Asparagaceae | Milla biflora | 19.95861  |
| 1502 | Asparagaceae | Milla biflora | 20.908611 |
| 1503 | Asparagaceae | Milla biflora | 20.909    |
| 1504 | Asparagaceae | Milla biflora | 19.411667 |
| 1505 | Asparagaceae | Milla biflora | 19.412    |
| 1506 | Asparagaceae | Milla biflora | 19.645    |
| 1507 | Asparagaceae | Milla biflora | 19.600277 |
| 1508 | Asparagaceae | Milla biflora | 27.221    |
| 1509 | Asparagaceae | Milla biflora | 19.427    |
| 1510 | Asparagaceae | Milla biflora | 23.733    |
| 1511 | Asparagaceae | Milla biflora | 23.733334 |
| 1512 | Asparagaceae | Milla biflora | 21.2      |
| 1513 | Asparagaceae | Milla biflora | 21.293    |
| 1514 | Asparagaceae | Milla biflora | 21.293333 |
| 1515 | Asparagaceae | Milla biflora | 17.198    |
| 1516 | Asparagaceae | Milla biflora | 22.273    |
| 1517 | Asparagaceae | Milla biflora | 19.256666 |
| 1518 | Asparagaceae | Milla biflora | 28.333    |
| 1519 | Asparagaceae | Milla biflora | 28.333    |
| 1520 | Asparagaceae | Milla biflora | 28.374    |
| 1521 | Asparagaceae | Milla biflora | 28.392    |
| 1522 | Asparagaceae | Milla biflora | 20.8      |
| 1523 | Asparagaceae | Milla biflora | 22.029    |
| 1524 | Asparagaceae | Milla biflora | 22.064    |
| 1525 | Asparagaceae | Milla biflora | 19.708    |
| 1526 | Asparagaceae | Milla biflora | 19.708334 |
| 1527 | Asparagaceae | Milla biflora | 19.88     |
| 1528 | Asparagaceae | Milla biflora | 19.880278 |
| 1529 | Asparagaceae | Milla biflora | 19.924444 |
| 1530 | Asparagaceae | Milla biflora | 16.74     |
| 1531 | Asparagaceae | Milla biflora | 19.858    |
| 1532 | Asparagaceae | Milla biflora | 19.858334 |
| 1533 | Asparagaceae | Milla biflora | 19.47     |
| 1534 | Asparagaceae | Milla biflora | 17.89     |

|      |              |                     |            |
|------|--------------|---------------------|------------|
| 1535 | Asparagaceae | Milla biflora       | 18.18      |
| 1536 | Asparagaceae | Milla biflora       | 18.71      |
| 1537 | Asparagaceae | Milla biflora       | 19.04      |
| 1538 | Asparagaceae | Milla biflora       | 19.69      |
| 1539 | Asparagaceae | Milla biflora       | 19.73      |
| 1540 | Asparagaceae | Milla biflora       | 19.92      |
| 1541 | Asparagaceae | Milla biflora       | 20.99      |
| 1542 | Asparagaceae | Milla biflora       | 22.05      |
| 1543 | Asparagaceae | Milla biflora       | 23.91      |
| 1544 | Asparagaceae | Milla biflora       | 23.91      |
| 1545 | Asparagaceae | Milla biflora       | 23.92      |
| 1546 | Asparagaceae | Milla biflora       | 24.05      |
| 1547 | Asparagaceae | Milla biflora       | 27.11667   |
| 1548 | Asparagaceae | Milla biflora       | 27.117     |
| 1549 | Asparagaceae | Milla biflora       | 27.117     |
| 1550 | Asparagaceae | Milla biflora       | 28.23889   |
| 1551 | Asparagaceae | Milla biflora       | 28.239     |
| 1552 | Asparagaceae | Milla biflora       | 28.239     |
| 1553 | Asparagaceae | Milla biflora       | 28.36667   |
| 1554 | Asparagaceae | Milla biflora       | 28.371666  |
| 1555 | Asparagaceae | Milla biflora       | 28.86      |
| 1556 | Asparagaceae | Milla biflora       | 29.379     |
| 1557 | Asparagaceae | Milla biflora       | 29.379     |
| 1558 | Asparagaceae | Milla biflora       | 29.98      |
| 1559 | Asparagaceae | Milla bryanii       | 29.5113889 |
| 1560 | Asparagaceae | Milla bryanii       | 27.1347222 |
| 1561 | Asparagaceae | Milla magnifica     | 18.3952778 |
| 1562 | Asparagaceae | Milla magnifica     | 18.6       |
| 1563 | Asparagaceae | Milla oaxacana      | 17.55      |
| 1564 | Asparagaceae | Milla oaxacana      | 17.11      |
| 1565 | Asparagaceae | Milla oaxacana      | 17.6666667 |
| 1566 | Asparagaceae | Milla rosea         | 25.0666667 |
| 1567 | Asparagaceae | Brodiaea jolonensis | 32         |
| 1568 | Asparagaceae | Dandya hannibalii   | 18.69167   |
| 1569 | Asparagaceae | Dandya purpusii     | 26.2       |
| 1570 | Asparagaceae | Milla filifolia     | 18.714888  |
| 1571 | Asparagaceae | Milla potosina      | 16.665012  |
| 1572 | Asparagaceae | Milla delicata      | 17.073813  |
| 1573 | Asparagaceae | Milla mexicana      | 18.152615  |
| 1574 | Orchidaceae  | Govenia alba        | 15.86667   |
| 1575 | Orchidaceae  | Govenia alba        | 16.96      |
| 1576 | Orchidaceae  | Govenia alba        | 19.573     |
| 1577 | Orchidaceae  | Govenia alba        | 21.218     |
| 1578 | Orchidaceae  | Govenia alba        | 21.95      |
| 1579 | Orchidaceae  | Govenia alba        | 23.08333   |

|      |             |                      |            |
|------|-------------|----------------------|------------|
| 1580 | Orchidaceae | Govenia bella        | 15.4272223 |
| 1581 | Orchidaceae | Govenia bella        | 17.1       |
| 1582 | Orchidaceae | Govenia dressleriana | 17.1011111 |
| 1583 | Orchidaceae | Govenia dressleriana | 16.72      |
| 1584 | Orchidaceae | Govenia dressleriana | 17.726     |
| 1585 | Orchidaceae | Govenia dressleriana | 18.76639   |
| 1586 | Orchidaceae | Govenia elliptica    | 25.6667    |
| 1587 | Orchidaceae | Govenia lagenophora  | 25.91666   |
| 1588 | Orchidaceae | Govenia lagenophora  | 19.0333333 |
| 1589 | Orchidaceae | Govenia lagenophora  | 19.39972   |
| 1590 | Orchidaceae | Govenia lagenophora  | 19.367     |
| 1591 | Orchidaceae | Govenia liliacea     | 16.72      |
| 1592 | Orchidaceae | Govenia liliacea     | 18.9       |
| 1593 | Orchidaceae | Govenia liliacea     | 18.52      |
| 1594 | Orchidaceae | Govenia liliacea     | 23.966667  |
| 1595 | Orchidaceae | Govenia liliacea     | 22.05      |
| 1596 | Orchidaceae | Govenia liliacea     | 23.53      |
| 1597 | Orchidaceae | Govenia liliacea     | 16.67889   |
| 1598 | Orchidaceae | Govenia liliacea     | 18.317     |
| 1599 | Orchidaceae | Govenia liliacea     | 20.202     |
| 1600 | Orchidaceae | Govenia liliacea     | 20.152     |
| 1601 | Orchidaceae | Govenia liliacea     | 20.915     |
| 1602 | Orchidaceae | Govenia liliacea     | 20.756     |
| 1603 | Orchidaceae | Govenia liliacea     | 23.133     |
| 1604 | Orchidaceae | Govenia liliacea     | 28.17222   |
| 1605 | Orchidaceae | Govenia mutica       | 16.9972222 |
| 1606 | Orchidaceae | Govenia mutica       | 21.95      |
| 1607 | Orchidaceae | Govenia mutica       | 15.86667   |
| 1608 | Orchidaceae | Govenia mutica       | 19.573     |
| 1609 | Orchidaceae | Govenia mutica       | 21.218     |
| 1610 | Orchidaceae | Govenia mutica       | 23.08333   |
| 1611 | Orchidaceae | Govenia praecox      | 21.222     |
| 1612 | Orchidaceae | Govenia praecox      | 18.834801  |
| 1613 | Orchidaceae | Govenia purpusii     | 17.45      |
| 1614 | Orchidaceae | Govenia purpusii     | 17.767     |
| 1615 | Orchidaceae | Govenia purpusii     | 19.647     |
| 1616 | Orchidaceae | Govenia purpusii     | 19.965     |
| 1617 | Orchidaceae | Govenia purpusii     | 20.78      |
| 1618 | Orchidaceae | Govenia purpusii     | 20.07      |
| 1619 | Orchidaceae | Govenia purpusii     | 20.172     |
| 1620 | Orchidaceae | Govenia rubellilabia | 15.272657  |
| 1621 | Orchidaceae | Govenia superba      | 16.77      |
| 1622 | Orchidaceae | Govenia superba      | 18.16666   |
| 1623 | Orchidaceae | Govenia superba      | 19.5833333 |
| 1624 | Orchidaceae | Govenia superba      | 18.866667  |

|      |             |                    |            |
|------|-------------|--------------------|------------|
| 1625 | Orchidaceae | Govenia superba    | 19.45      |
| 1626 | Orchidaceae | Govenia superba    | 18.99      |
| 1627 | Orchidaceae | Govenia superba    | 16.7966666 |
| 1628 | Orchidaceae | Govenia superba    | 18.52      |
| 1629 | Orchidaceae | Govenia superba    | 18.26667   |
| 1630 | Orchidaceae | Govenia superba    | 19.03472   |
| 1631 | Orchidaceae | Govenia superba    | 20.915     |
| 1632 | Orchidaceae | Govenia superba    | 23.417     |
| 1633 | Orchidaceae | Govenia tequilana  | 20.78      |
| 1634 | Orchidaceae | Bletia adenocarpa  | 16.28      |
| 1635 | Orchidaceae | Bletia adenocarpa  | 17.62556   |
| 1636 | Orchidaceae | Bletia adenocarpa  | 17.84111   |
| 1637 | Orchidaceae | Bletia adenocarpa  | 17.24389   |
| 1638 | Orchidaceae | Bletia adenocarpa  | 18.926     |
| 1639 | Orchidaceae | Bletia adenocarpa  | 18.62      |
| 1640 | Orchidaceae | Bletia adenocarpa  | 19.357     |
| 1641 | Orchidaceae | Bletia adenocarpa  | 19.155     |
| 1642 | Orchidaceae | Bletia adenocarpa  | 19.04      |
| 1643 | Orchidaceae | Bletia adenocarpa  | 20.78      |
| 1644 | Orchidaceae | Bletia adenocarpa  | 20.67      |
| 1645 | Orchidaceae | Bletia adenocarpa  | 21.043     |
| 1646 | Orchidaceae | Bletia adenocarpa  | 23.938     |
| 1647 | Orchidaceae | Bletia adenocarpa  | 23.496     |
| 1648 | Orchidaceae | Bletia adenocarpa  | 24.167     |
| 1649 | Orchidaceae | Bletia adenocarpa  | 24.632     |
| 1650 | Orchidaceae | Bletia adenocarpa  | 20.87279   |
| 1651 | Orchidaceae | Bletia adenocarpa  | 18.892939  |
| 1652 | Orchidaceae | Bletia adenocarpa  | 16.27847   |
| 1653 | Orchidaceae | Bletia adenocarpa  | 17.317965  |
| 1654 | Orchidaceae | Bletia adenocarpa  | 20.701655  |
| 1655 | Orchidaceae | Bletia adenocarpa  | 20.860144  |
| 1656 | Orchidaceae | Bletia adenocarpa  | 18.979191  |
| 1657 | Orchidaceae | Bletia adenocarpa  | 17.316728  |
| 1658 | Orchidaceae | Bletia adenocarpa  | 20.777349  |
| 1659 | Orchidaceae | Bletia adenocarpa  | 19.308154  |
| 1660 | Orchidaceae | Bletia campanulata | -16.35     |
| 1661 | Orchidaceae | Bletia campanulata | -16.7261   |
| 1662 | Orchidaceae | Bletia campanulata | -15.22     |
| 1663 | Orchidaceae | Bletia campanulata | 8.79       |
| 1664 | Orchidaceae | Bletia campanulata | 9.76611    |
| 1665 | Orchidaceae | Bletia campanulata | 9.8283     |
| 1666 | Orchidaceae | Bletia campanulata | 12.97      |
| 1667 | Orchidaceae | Bletia campanulata | 12.93      |
| 1668 | Orchidaceae | Bletia campanulata | 13.73      |
| 1669 | Orchidaceae | Bletia campanulata | 13.05      |

|      |             |                    |           |
|------|-------------|--------------------|-----------|
| 1670 | Orchidaceae | Bletia campanulata | 13.75     |
| 1671 | Orchidaceae | Bletia campanulata | 14.14     |
| 1672 | Orchidaceae | Bletia campanulata | 14.3      |
| 1673 | Orchidaceae | Bletia campanulata | 15.506    |
| 1674 | Orchidaceae | Bletia campanulata | 16.24944  |
| 1675 | Orchidaceae | Bletia campanulata | 16.30167  |
| 1676 | Orchidaceae | Bletia campanulata | 16.71667  |
| 1677 | Orchidaceae | Bletia campanulata | 16.683    |
| 1678 | Orchidaceae | Bletia campanulata | 16.709    |
| 1679 | Orchidaceae | Bletia campanulata | 16.41278  |
| 1680 | Orchidaceae | Bletia campanulata | 16.734    |
| 1681 | Orchidaceae | Bletia campanulata | 18.897    |
| 1682 | Orchidaceae | Bletia campanulata | 18.45     |
| 1683 | Orchidaceae | Bletia campanulata | 18.967    |
| 1684 | Orchidaceae | Bletia campanulata | 19.662    |
| 1685 | Orchidaceae | Bletia campanulata | 19.155    |
| 1686 | Orchidaceae | Bletia campanulata | 19.48     |
| 1687 | Orchidaceae | Bletia campanulata | 19.383    |
| 1688 | Orchidaceae | Bletia campanulata | 19.752    |
| 1689 | Orchidaceae | Bletia campanulata | 19.405    |
| 1690 | Orchidaceae | Bletia campanulata | 19.63     |
| 1691 | Orchidaceae | Bletia campanulata | 19.902    |
| 1692 | Orchidaceae | Bletia campanulata | 19.329    |
| 1693 | Orchidaceae | Bletia campanulata | 19.314    |
| 1694 | Orchidaceae | Bletia campanulata | 19.1      |
| 1695 | Orchidaceae | Bletia campanulata | 19.317    |
| 1696 | Orchidaceae | Bletia campanulata | 20.3333   |
| 1697 | Orchidaceae | Bletia campanulata | 21.241    |
| 1698 | Orchidaceae | Bletia campanulata | 21.357    |
| 1699 | Orchidaceae | Bletia campanulata | 21.033    |
| 1700 | Orchidaceae | Bletia campanulata | 23.779    |
| 1701 | Orchidaceae | Bletia campanulata | 19.051636 |
| 1702 | Orchidaceae | Bletia campanulata | 19.406748 |
| 1703 | Orchidaceae | Bletia campanulata | 17.528711 |
| 1704 | Orchidaceae | Bletia campanulata | 16.206489 |
| 1705 | Orchidaceae | Bletia campanulata | 18.95938  |
| 1706 | Orchidaceae | Bletia campanulata | 18.957515 |
| 1707 | Orchidaceae | Bletia campanulata | 13.746429 |
| 1708 | Orchidaceae | Bletia campanulata | 23.844629 |
| 1709 | Orchidaceae | Bletia campanulata | 15.517461 |
| 1710 | Orchidaceae | Bletia campanulata | 21.374591 |
| 1711 | Orchidaceae | Bletia campanulata | 19.246107 |
| 1712 | Orchidaceae | Bletia campanulata | 12.565684 |
| 1713 | Orchidaceae | Bletia campanulata | 21.521063 |
| 1714 | Orchidaceae | Bletia campanulata | 10.679378 |

|      |             |                    |            |
|------|-------------|--------------------|------------|
| 1715 | Orchidaceae | Bletia campanulata | 13.709004  |
| 1716 | Orchidaceae | Bletia campanulata | 16.773519  |
| 1717 | Orchidaceae | Bletia campanulata | 19.576666  |
| 1718 | Orchidaceae | Bletia campanulata | 19.532162  |
| 1719 | Orchidaceae | Bletia campanulata | 20.66155   |
| 1720 | Orchidaceae | Bletia campanulata | 15.427842  |
| 1721 | Orchidaceae | Bletia campanulata | 17.774539  |
| 1722 | Orchidaceae | Bletia campanulata | 14.023551  |
| 1723 | Orchidaceae | Bletia campanulata | 22.1833    |
| 1724 | Orchidaceae | Bletia campanulata | 18.898451  |
| 1725 | Orchidaceae | Bletia campanulata | 19.488471  |
| 1726 | Orchidaceae | Bletia campanulata | 22.000531  |
| 1727 | Orchidaceae | Bletia campanulata | 19.378071  |
| 1728 | Orchidaceae | Bletia campanulata | 19.649543  |
| 1729 | Orchidaceae | Bletia campanulata | 16.529149  |
| 1730 | Orchidaceae | Bletia campanulata | 18.952224  |
| 1731 | Orchidaceae | Bletia campanulata | 16.304645  |
| 1732 | Orchidaceae | Bletia campanulata | -15.548454 |
| 1733 | Orchidaceae | Bletia campanulata | 17.118537  |
| 1734 | Orchidaceae | Bletia campanulata | 18.914576  |
| 1735 | Orchidaceae | Bletia campanulata | 15.50058   |
| 1736 | Orchidaceae | Bletia campanulata | 18.858232  |
| 1737 | Orchidaceae | Bletia campanulata | 19.314184  |
| 1738 | Orchidaceae | Bletia campanulata | 23.031022  |
| 1739 | Orchidaceae | Bletia campanulata | 2.438696   |
| 1740 | Orchidaceae | Bletia campanulata | 18.795708  |
| 1741 | Orchidaceae | Bletia campanulata | 20.726385  |
| 1742 | Orchidaceae | Bletia campanulata | 13.865239  |
| 1743 | Orchidaceae | Bletia campanulata | 13.798524  |
| 1744 | Orchidaceae | Bletia campanulata | 19.359088  |
| 1745 | Orchidaceae | Bletia campanulata | 19.063418  |
| 1746 | Orchidaceae | Bletia campanulata | -1.433316  |
| 1747 | Orchidaceae | Bletia campanulata | 13.418257  |
| 1748 | Orchidaceae | Bletia campanulata | 20.448555  |
| 1749 | Orchidaceae | Bletia campanulata | 19.479589  |
| 1750 | Orchidaceae | Bletia coccinea    | 20.215725  |
| 1751 | Orchidaceae | Bletia coccinea    | 20.652575  |
| 1752 | Orchidaceae | Bletia coccinea    | 18.910126  |
| 1753 | Orchidaceae | Bletia coccinea    | 18.221623  |
| 1754 | Orchidaceae | Bletia coccinea    | 18.892228  |
| 1755 | Orchidaceae | Bletia coccinea    | 19.306497  |
| 1756 | Orchidaceae | Bletia coccinea    | 18.775423  |
| 1757 | Orchidaceae | Bletia coccinea    | 18.975139  |
| 1758 | Orchidaceae | Bletia coccinea    | 16.68444   |
| 1759 | Orchidaceae | Bletia coccinea    | 17.633     |

|      |             |                      |           |
|------|-------------|----------------------|-----------|
| 1760 | Orchidaceae | Bletia coccinea      | 17.83694  |
| 1761 | Orchidaceae | Bletia coccinea      | 17.583    |
| 1762 | Orchidaceae | Bletia coccinea      | 17.646    |
| 1763 | Orchidaceae | Bletia coccinea      | 18.66944  |
| 1764 | Orchidaceae | Bletia coccinea      | 18.87     |
| 1765 | Orchidaceae | Bletia coccinea      | 18.95     |
| 1766 | Orchidaceae | Bletia coccinea      | 18.967    |
| 1767 | Orchidaceae | Bletia coccinea      | 19.155    |
| 1768 | Orchidaceae | Bletia coccinea      | 19.04     |
| 1769 | Orchidaceae | Bletia coccinea      | 19.1      |
| 1770 | Orchidaceae | Bletia coccinea      | 20.8      |
| 1771 | Orchidaceae | Bletia coccinea      | 20.67     |
| 1772 | Orchidaceae | Bletia coccinea      | 20.935    |
| 1773 | Orchidaceae | Bletia coccinea      | 30.696    |
| 1774 | Orchidaceae | Bletia greenwoodiana | 22.798426 |
| 1775 | Orchidaceae | Bletia ensifolia     | 20.216293 |
| 1776 | Orchidaceae | Bletia ensifolia     | 20.674805 |
| 1777 | Orchidaceae | Bletia ensifolia     | 26.343029 |
| 1778 | Orchidaceae | Bletia ensifolia     | 23.52897  |
| 1779 | Orchidaceae | Bletia ensifolia     | 23.949593 |
| 1780 | Orchidaceae | Bletia ensifolia     | 20.501599 |
| 1781 | Orchidaceae | Bletia ensifolia     | 21.919734 |
| 1782 | Orchidaceae | Bletia ensifolia     | 20.724693 |
| 1783 | Orchidaceae | Bletia ensifolia     | 20.733844 |
| 1784 | Orchidaceae | Bletia ensifolia     | 18.8      |
| 1785 | Orchidaceae | Bletia ensifolia     | 20.533    |
| 1786 | Orchidaceae | Bletia ensifolia     | 21.50472  |
| 1787 | Orchidaceae | Bletia ensifolia     | 21.832    |
| 1788 | Orchidaceae | Bletia ensifolia     | 22.96     |
| 1789 | Orchidaceae | Bletia ensifolia     | 23.236    |
| 1790 | Orchidaceae | Bletia ensifolia     | 23.33056  |
| 1791 | Orchidaceae | Bletia ensifolia     | 23        |
| 1792 | Orchidaceae | Bletia gracilis      | 19.691684 |
| 1793 | Orchidaceae | Bletia gracilis      | 21.237864 |
| 1794 | Orchidaceae | Bletia gracilis      | 21.614883 |
| 1795 | Orchidaceae | Bletia gracilis      | 18.620004 |
| 1796 | Orchidaceae | Bletia gracilis      | 18.934985 |
| 1797 | Orchidaceae | Bletia gracilis      | 19.013384 |
| 1798 | Orchidaceae | Bletia gracilis      | 18.852858 |
| 1799 | Orchidaceae | Bletia gracilis      | 18.433387 |
| 1800 | Orchidaceae | Bletia gracilis      | 19.248784 |
| 1801 | Orchidaceae | Bletia gracilis      | 19.407068 |
| 1802 | Orchidaceae | Bletia gracilis      | 18.828922 |
| 1803 | Orchidaceae | Bletia gracilis      | 17.292582 |
| 1804 | Orchidaceae | Bletia gracilis      | 18.969682 |

|      |             |                               |           |
|------|-------------|-------------------------------|-----------|
| 1805 | Orchidaceae | <i>Bletia gracilis</i>        | 19.637431 |
| 1806 | Orchidaceae | <i>Bletia gracilis</i>        | 21.374246 |
| 1807 | Orchidaceae | <i>Bletia gracilis</i>        | 18.620137 |
| 1808 | Orchidaceae | <i>Bletia gracilis</i>        | 16.2      |
| 1809 | Orchidaceae | <i>Bletia gracilis</i>        | 17.23     |
| 1810 | Orchidaceae | <i>Bletia gracilis</i>        | 18.189    |
| 1811 | Orchidaceae | <i>Bletia gracilis</i>        | 18.951    |
| 1812 | Orchidaceae | <i>Bletia gracilis</i>        | 18.468    |
| 1813 | Orchidaceae | <i>Bletia gracilis</i>        | 18.917    |
| 1814 | Orchidaceae | <i>Bletia gracilis</i>        | 18.51111  |
| 1815 | Orchidaceae | <i>Bletia gracilis</i>        | 18.95     |
| 1816 | Orchidaceae | <i>Bletia gracilis</i>        | 19.418    |
| 1817 | Orchidaceae | <i>Bletia gracilis</i>        | 19.6      |
| 1818 | Orchidaceae | <i>Bletia gracilis</i>        | 19        |
| 1819 | Orchidaceae | <i>Bletia gracilis</i>        | 21.241    |
| 1820 | Orchidaceae | <i>Bletia gracilis</i>        | 27.06     |
| 1821 | Orchidaceae | <i>Bletia gracilis</i>        | 27.32667  |
| 1822 | Orchidaceae | <i>Bletia gracilis</i>        | 27.117    |
| 1823 | Orchidaceae | <i>Bletia gracilis</i>        | 27.6      |
| 1824 | Orchidaceae | <i>Bletia gracilis</i>        | 27.35     |
| 1825 | Orchidaceae | <i>Bletia gracilis</i>        | 28.38333  |
| 1826 | Orchidaceae | <i>Bletia gracilis</i>        | 28.5      |
| 1827 | Orchidaceae | <i>Bletia gracilis</i>        | 28.41306  |
| 1828 | Orchidaceae | <i>Bletia lilacina</i>        | 17.836943 |
| 1829 | Orchidaceae | <i>Bletia lilacina</i>        | 17.11892  |
| 1830 | Orchidaceae | <i>Bletia lilacina</i>        | 17.126324 |
| 1831 | Orchidaceae | <i>Bletia lilacina</i>        | 15.95917  |
| 1832 | Orchidaceae | <i>Bletia lilacina</i>        | 17.1      |
| 1833 | Orchidaceae | <i>Bletia lilacina</i>        | 17.111    |
| 1834 | Orchidaceae | <i>Bletia lilacina</i>        | 18.85     |
| 1835 | Orchidaceae | <i>Bletia lilacina</i>        | 18.863    |
| 1836 | Orchidaceae | <i>Bletia lilacina</i>        | 18.55     |
| 1837 | Orchidaceae | <i>Bletia lilacina</i>        | 18.937    |
| 1838 | Orchidaceae | <i>Bletia lilacina</i>        | 18.87     |
| 1839 | Orchidaceae | <i>Bletia lilacina</i>        | 20.347    |
| 1840 | Orchidaceae | <i>Bletia macristhmochila</i> | 20.240081 |
| 1841 | Orchidaceae | <i>Bletia macristhmochila</i> | 19.747936 |
| 1842 | Orchidaceae | <i>Bletia macristhmochila</i> | 20.809442 |
| 1843 | Orchidaceae | <i>Bletia macristhmochila</i> | 25.621746 |
| 1844 | Orchidaceae | <i>Bletia macristhmochila</i> | 17.575877 |
| 1845 | Orchidaceae | <i>Bletia macristhmochila</i> | 19.212957 |
| 1846 | Orchidaceae | <i>Bletia macristhmochila</i> | 19.869467 |
| 1847 | Orchidaceae | <i>Bletia macristhmochila</i> | 18.888185 |
| 1848 | Orchidaceae | <i>Bletia macristhmochila</i> | 21.143802 |
| 1849 | Orchidaceae | <i>Bletia macristhmochila</i> | 20.659958 |



|      |             |                        |           |
|------|-------------|------------------------|-----------|
| 1850 | Orchidaceae | Bletia macristhmochila | 17.333    |
| 1851 | Orchidaceae | Bletia macristhmochila | 18.87     |
| 1852 | Orchidaceae | Bletia macristhmochila | 18.967    |
| 1853 | Orchidaceae | Bletia macristhmochila | 18.467    |
| 1854 | Orchidaceae | Bletia macristhmochila | 18.87     |
| 1855 | Orchidaceae | Bletia macristhmochila | 18.883    |
| 1856 | Orchidaceae | Bletia macristhmochila | 19.155    |
| 1857 | Orchidaceae | Bletia macristhmochila | 19.818    |
| 1858 | Orchidaceae | Bletia macristhmochila | 19.502    |
| 1859 | Orchidaceae | Bletia macristhmochila | 19.457    |
| 1860 | Orchidaceae | Bletia macristhmochila | 20.633    |
| 1861 | Orchidaceae | Bletia macristhmochila | 21.817    |
| 1862 | Orchidaceae | Bletia macristhmochila | 21.333    |
| 1863 | Orchidaceae | Bletia macristhmochila | 22.783    |
| 1864 | Orchidaceae | Bletia macristhmochila | 23.585    |
| 1865 | Orchidaceae | Bletia macristhmochila | 23.779    |
| 1866 | Orchidaceae | Bletia macristhmochila | 24.167    |
| 1867 | Orchidaceae | Bletia macristhmochila | 24.23333  |
| 1868 | Orchidaceae | Bletia macristhmochila | 24        |
| 1869 | Orchidaceae | Bletia neglecta        | 19.664    |
| 1870 | Orchidaceae | Bletia neglecta        | 19.043    |
| 1871 | Orchidaceae | Bletia neglecta        | 19        |
| 1872 | Orchidaceae | Bletia neglecta        | 19.067    |
| 1873 | Orchidaceae | Bletia neglecta        | 19.92944  |
| 1874 | Orchidaceae | Bletia neglecta        | 20.493    |
| 1875 | Orchidaceae | Bletia neglecta        | 20.483    |
| 1876 | Orchidaceae | Bletia neglecta        | 20.915    |
| 1877 | Orchidaceae | Bletia neglecta        | 20.633    |
| 1878 | Orchidaceae | Bletia neglecta        | 21.396    |
| 1879 | Orchidaceae | Bletia neglecta        | 21.067    |
| 1880 | Orchidaceae | Bletia neglecta        | 19.167565 |
| 1881 | Orchidaceae | Bletia neglecta        | 19.154287 |
| 1882 | Orchidaceae | Bletia neglecta        | 19.024015 |
| 1883 | Orchidaceae | Bletia neglecta        | 19.040961 |
| 1884 | Orchidaceae | Bletia neglecta        | 19.842007 |
| 1885 | Orchidaceae | Bletia neglecta        | 19.741796 |
| 1886 | Orchidaceae | Bletia neglecta        | 19.44972  |
| 1887 | Orchidaceae | Bletia neglecta        | 20.995376 |
| 1888 | Orchidaceae | Bletia neglecta        | 20.168743 |
| 1889 | Orchidaceae | Bletia neglecta        | 19.71005  |
| 1890 | Orchidaceae | Bletia neglecta        | 19.283235 |
| 1891 | Orchidaceae | Bletia neglecta        | 19.23122  |
| 1892 | Orchidaceae | Bletia neglecta        | 20.3833   |
| 1893 | Orchidaceae | Bletia neglecta        | 19.800042 |
| 1894 | Orchidaceae | Bletia neglecta        | 19.021649 |

|      |             |                           |           |
|------|-------------|---------------------------|-----------|
| 1895 | Orchidaceae | <i>Bletia neglecta</i>    | 21.83714  |
| 1896 | Orchidaceae | <i>Bletia neglecta</i>    | 19.142344 |
| 1897 | Orchidaceae | <i>Bletia neglecta</i>    | 20.349963 |
| 1898 | Orchidaceae | <i>Bletia neglecta</i>    | 18.964838 |
| 1899 | Orchidaceae | <i>Bletia neglecta</i>    | 18.85213  |
| 1900 | Orchidaceae | <i>Bletia neglecta</i>    | 19.0164   |
| 1901 | Orchidaceae | <i>Bletia parkinsonii</i> | 17.212301 |
| 1902 | Orchidaceae | <i>Bletia parkinsonii</i> | 18.408489 |
| 1903 | Orchidaceae | <i>Bletia parkinsonii</i> | 19.430049 |
| 1904 | Orchidaceae | <i>Bletia parkinsonii</i> | 18.969602 |
| 1905 | Orchidaceae | <i>Bletia parkinsonii</i> | 18.609786 |
| 1906 | Orchidaceae | <i>Bletia parkinsonii</i> | 17.496234 |
| 1907 | Orchidaceae | <i>Bletia parkinsonii</i> | 18.456399 |
| 1908 | Orchidaceae | <i>Bletia parkinsonii</i> | 19.95     |
| 1909 | Orchidaceae | <i>Bletia parkinsonii</i> | 16.063    |
| 1910 | Orchidaceae | <i>Bletia parkinsonii</i> | 17.487    |
| 1911 | Orchidaceae | <i>Bletia parkinsonii</i> | 17.75     |
| 1912 | Orchidaceae | <i>Bletia parkinsonii</i> | 17.483    |
| 1913 | Orchidaceae | <i>Bletia parkinsonii</i> | 17.583    |
| 1914 | Orchidaceae | <i>Bletia parkinsonii</i> | 17.95     |
| 1915 | Orchidaceae | <i>Bletia parkinsonii</i> | 17.268    |
| 1916 | Orchidaceae | <i>Bletia parkinsonii</i> | 17.59306  |
| 1917 | Orchidaceae | <i>Bletia parkinsonii</i> | 18.802    |
| 1918 | Orchidaceae | <i>Bletia parkinsonii</i> | 18.85     |
| 1919 | Orchidaceae | <i>Bletia parkinsonii</i> | 19.053    |
| 1920 | Orchidaceae | <i>Bletia parkinsonii</i> | 19.147    |
| 1921 | Orchidaceae | <i>Bletia parkinsonii</i> | 19.468    |
| 1922 | Orchidaceae | <i>Bletia parkinsonii</i> | 19.336    |
| 1923 | Orchidaceae | <i>Bletia parkinsonii</i> | 19.433    |
| 1924 | Orchidaceae | <i>Bletia parkinsonii</i> | 20.983    |
| 1925 | Orchidaceae | <i>Bletia parkinsonii</i> | 23.965    |
| 1926 | Orchidaceae | <i>Bletia punctata</i>    | 19.452465 |
| 1927 | Orchidaceae | <i>Bletia punctata</i>    | 17.120783 |
| 1928 | Orchidaceae | <i>Bletia punctata</i>    | 19.03833  |
| 1929 | Orchidaceae | <i>Bletia punctata</i>    | 20.809495 |
| 1930 | Orchidaceae | <i>Bletia punctata</i>    | 20.648    |
| 1931 | Orchidaceae | <i>Bletia punctata</i>    | 19.669143 |
| 1932 | Orchidaceae | <i>Bletia punctata</i>    | 20.588884 |
| 1933 | Orchidaceae | <i>Bletia punctata</i>    | 19.412366 |
| 1934 | Orchidaceae | <i>Bletia punctata</i>    | 19.647194 |
| 1935 | Orchidaceae | <i>Bletia punctata</i>    | 18.970542 |
| 1936 | Orchidaceae | <i>Bletia punctata</i>    | 17.11892  |
| 1937 | Orchidaceae | <i>Bletia punctata</i>    | 16.416696 |
| 1938 | Orchidaceae | <i>Bletia punctata</i>    | 20.87453  |
| 1939 | Orchidaceae | <i>Bletia punctata</i>    | 16.01667  |

|      |             |                  |           |
|------|-------------|------------------|-----------|
| 1940 | Orchidaceae | Bletia punctata  | 17.65083  |
| 1941 | Orchidaceae | Bletia punctata  | 17.41667  |
| 1942 | Orchidaceae | Bletia punctata  | 17.86861  |
| 1943 | Orchidaceae | Bletia punctata  | 18.926    |
| 1944 | Orchidaceae | Bletia punctata  | 18.467    |
| 1945 | Orchidaceae | Bletia punctata  | 19.779    |
| 1946 | Orchidaceae | Bletia punctata  | 19.428    |
| 1947 | Orchidaceae | Bletia punctata  | 19.818    |
| 1948 | Orchidaceae | Bletia punctata  | 19.04     |
| 1949 | Orchidaceae | Bletia punctata  | 19.019    |
| 1950 | Orchidaceae | Bletia punctata  | 21.33306  |
| 1951 | Orchidaceae | Bletia purpurata | 19.113091 |
| 1952 | Orchidaceae | Bletia purpurata | 15.567369 |
| 1953 | Orchidaceae | Bletia purpurata | 19.399948 |
| 1954 | Orchidaceae | Bletia purpurata | 19.489835 |
| 1955 | Orchidaceae | Bletia purpurata | 18.987387 |
| 1956 | Orchidaceae | Bletia purpurata | 25.436746 |
| 1957 | Orchidaceae | Bletia purpurata | 19.101482 |
| 1958 | Orchidaceae | Bletia purpurata | 8.24      |
| 1959 | Orchidaceae | Bletia purpurata | 10.02     |
| 1960 | Orchidaceae | Bletia purpurata | 12.93     |
| 1961 | Orchidaceae | Bletia purpurata | 13.73     |
| 1962 | Orchidaceae | Bletia purpurata | 15.86667  |
| 1963 | Orchidaceae | Bletia purpurata | 17.18     |
| 1964 | Orchidaceae | Bletia purpurata | 17.267    |
| 1965 | Orchidaceae | Bletia purpurata | 18.79     |
| 1966 | Orchidaceae | Bletia purpurata | 18.9      |
| 1967 | Orchidaceae | Bletia purpurata | 18.967    |
| 1968 | Orchidaceae | Bletia purpurata | 18.483    |
| 1969 | Orchidaceae | Bletia purpurata | 18.459    |
| 1970 | Orchidaceae | Bletia purpurata | 18.967    |
| 1971 | Orchidaceae | Bletia purpurata | 18.783    |
| 1972 | Orchidaceae | Bletia purpurata | 18.08583  |
| 1973 | Orchidaceae | Bletia purpurata | 19.7      |
| 1974 | Orchidaceae | Bletia purpurata | 19.367    |
| 1975 | Orchidaceae | Bletia purpurata | 19.707    |
| 1976 | Orchidaceae | Bletia purpurata | 19.64056  |
| 1977 | Orchidaceae | Bletia purpurata | 19.530315 |
| 1978 | Orchidaceae | Bletia purpurata | 19.191804 |
| 1979 | Orchidaceae | Bletia purpurata | 19.043267 |
| 1980 | Orchidaceae | Bletia purpurata | 19.683    |
| 1981 | Orchidaceae | Bletia purpurata | 19.29     |
| 1982 | Orchidaceae | Bletia purpurata | 20.285    |
| 1983 | Orchidaceae | Bletia purpurata | 21.388    |
| 1984 | Orchidaceae | Bletia purpurata | 21.182    |

|      |             |                  |           |
|------|-------------|------------------|-----------|
| 1985 | Orchidaceae | Bletia purpurata | 22.32     |
| 1986 | Orchidaceae | Bletia purpurata | 23.233    |
| 1987 | Orchidaceae | Bletia purpurata | 23.517    |
| 1988 | Orchidaceae | Bletia purpurata | 23.454    |
| 1989 | Orchidaceae | Bletia purpurata | 26.392    |
| 1990 | Orchidaceae | Bletia purpurata | 27.608    |
| 1991 | Orchidaceae | Bletia purpurea  | 15.778722 |
| 1992 | Orchidaceae | Bletia purpurea  | 15.480115 |
| 1993 | Orchidaceae | Bletia purpurea  | 16.805407 |
| 1994 | Orchidaceae | Bletia purpurea  | 17.411655 |
| 1995 | Orchidaceae | Bletia purpurea  | 9.993812  |
| 1996 | Orchidaceae | Bletia purpurea  | 9.835318  |
| 1997 | Orchidaceae | Bletia purpurea  | 8.639282  |
| 1998 | Orchidaceae | Bletia purpurea  | 15.479288 |
| 1999 | Orchidaceae | Bletia purpurea  | 16.772912 |
| 2000 | Orchidaceae | Bletia purpurea  | 9.25025   |
| 2001 | Orchidaceae | Bletia purpurea  | 14.605799 |
| 2002 | Orchidaceae | Bletia purpurea  | 6.34802   |
| 2003 | Orchidaceae | Bletia purpurea  | 14.015935 |
| 2004 | Orchidaceae | Bletia purpurea  | 13.62559  |
| 2005 | Orchidaceae | Bletia purpurea  | 14.605095 |
| 2006 | Orchidaceae | Bletia purpurea  | 15.761649 |
| 2007 | Orchidaceae | Bletia purpurea  | -2.58849  |
| 2008 | Orchidaceae | Bletia purpurea  | 15.355609 |
| 2009 | Orchidaceae | Bletia purpurea  | 15.504367 |
| 2010 | Orchidaceae | Bletia purpurea  | 15.479694 |
| 2011 | Orchidaceae | Bletia purpurea  | 14.608479 |
| 2012 | Orchidaceae | Bletia purpurea  | 14.911309 |
| 2013 | Orchidaceae | Bletia purpurea  | 18.442503 |
| 2014 | Orchidaceae | Bletia purpurea  | -0.583694 |
| 2015 | Orchidaceae | Bletia purpurea  | 14.618876 |
| 2016 | Orchidaceae | Bletia purpurea  | 17.186313 |
| 2017 | Orchidaceae | Bletia purpurea  | 16.082335 |
| 2018 | Orchidaceae | Bletia purpurea  | 18.854724 |
| 2019 | Orchidaceae | Bletia purpurea  | 18.608047 |
| 2020 | Orchidaceae | Bletia purpurea  | 18.918993 |
| 2021 | Orchidaceae | Bletia purpurea  | 17.443971 |
| 2022 | Orchidaceae | Bletia purpurea  | 21.186368 |
| 2023 | Orchidaceae | Bletia purpurea  | 16.962713 |
| 2024 | Orchidaceae | Bletia purpurea  | 20.244224 |
| 2025 | Orchidaceae | Bletia purpurea  | 21.859572 |
| 2026 | Orchidaceae | Bletia purpurea  | 22.359565 |
| 2027 | Orchidaceae | Bletia purpurea  | 18.575718 |
| 2028 | Orchidaceae | Bletia purpurea  | 21.683757 |
| 2029 | Orchidaceae | Bletia purpurea  | 19.388598 |

|      |             |                 |            |
|------|-------------|-----------------|------------|
| 2030 | Orchidaceae | Bletia purpurea | 16.323087  |
| 2031 | Orchidaceae | Bletia purpurea | 17.356314  |
| 2032 | Orchidaceae | Bletia purpurea | 18.183447  |
| 2033 | Orchidaceae | Bletia purpurea | 18.782527  |
| 2034 | Orchidaceae | Bletia purpurea | 18.970594  |
| 2035 | Orchidaceae | Bletia purpurea | 18.571441  |
| 2036 | Orchidaceae | Bletia purpurea | 20.859469  |
| 2037 | Orchidaceae | Bletia purpurea | 21.211906  |
| 2038 | Orchidaceae | Bletia purpurea | 20.554835  |
| 2039 | Orchidaceae | Bletia purpurea | 20.671733  |
| 2040 | Orchidaceae | Bletia purpurea | 18.649176  |
| 2041 | Orchidaceae | Bletia purpurea | 18.96845   |
| 2042 | Orchidaceae | Bletia purpurea | 18.607979  |
| 2043 | Orchidaceae | Bletia purpurea | 19.223121  |
| 2044 | Orchidaceae | Bletia purpurea | 18.6166667 |
| 2045 | Orchidaceae | Bletia purpurea | 16.653527  |
| 2046 | Orchidaceae | Bletia purpurea | 17.419427  |
| 2047 | Orchidaceae | Bletia purpurea | 15.990218  |
| 2048 | Orchidaceae | Bletia purpurea | 17.229684  |
| 2049 | Orchidaceae | Bletia purpurea | 28.739868  |
| 2050 | Orchidaceae | Bletia purpurea | 16.962713  |
| 2051 | Orchidaceae | Bletia purpurea | 8.790927   |
| 2052 | Orchidaceae | Bletia purpurea | 11.83333   |
| 2053 | Orchidaceae | Bletia purpurea | 21.249354  |
| 2054 | Orchidaceae | Bletia purpurea | 18.921573  |
| 2055 | Orchidaceae | Bletia purpurea | 20.998367  |
| 2056 | Orchidaceae | Bletia purpurea | 19.391552  |
| 2057 | Orchidaceae | Bletia purpurea | 17.958939  |
| 2058 | Orchidaceae | Bletia purpurea | 17.970722  |
| 2059 | Orchidaceae | Bletia purpurea | 22.335097  |
| 2060 | Orchidaceae | Bletia purpurea | 18.347288  |
| 2061 | Orchidaceae | Bletia purpurea | 24.683     |
| 2062 | Orchidaceae | Bletia purpurea | 15.47      |
| 2063 | Orchidaceae | Bletia purpurea | 19.890549  |
| 2064 | Orchidaceae | Bletia purpurea | 18.489659  |
| 2065 | Orchidaceae | Bletia purpurea | 19.3852778 |
| 2066 | Orchidaceae | Bletia purpurea | 11.971169  |
| 2067 | Orchidaceae | Bletia purpurea | 11.988038  |
| 2068 | Orchidaceae | Bletia purpurea | 8.788802   |
| 2069 | Orchidaceae | Bletia purpurea | 15.355609  |
| 2070 | Orchidaceae | Bletia purpurea | 11.83333   |
| 2071 | Orchidaceae | Bletia purpurea | 11.48      |
| 2072 | Orchidaceae | Bletia purpurea | 18.84      |
| 2073 | Orchidaceae | Bletia purpurea | 8.263732   |
| 2074 | Orchidaceae | Bletia purpurea | 7.920319   |

|      |             |                 |            |
|------|-------------|-----------------|------------|
| 2075 | Orchidaceae | Bletia purpurea | 14.6       |
| 2076 | Orchidaceae | Bletia purpurea | 13.998551  |
| 2077 | Orchidaceae | Bletia purpurea | 14.0916667 |
| 2078 | Orchidaceae | Bletia purpurea | 8.95       |
| 2079 | Orchidaceae | Bletia purpurea | 8.75417    |
| 2080 | Orchidaceae | Bletia purpurea | 8.49722    |
| 2081 | Orchidaceae | Bletia purpurea | 8.68       |
| 2082 | Orchidaceae | Bletia purpurea | 8.43       |
| 2083 | Orchidaceae | Bletia purpurea | 8.95       |
| 2084 | Orchidaceae | Bletia purpurea | 9.91       |
| 2085 | Orchidaceae | Bletia purpurea | 9.65278    |
| 2086 | Orchidaceae | Bletia purpurea | 9.11791    |
| 2087 | Orchidaceae | Bletia purpurea | 9.17       |
| 2088 | Orchidaceae | Bletia purpurea | 10.92917   |
| 2089 | Orchidaceae | Bletia purpurea | 10.11528   |
| 2090 | Orchidaceae | Bletia purpurea | 10.28      |
| 2091 | Orchidaceae | Bletia purpurea | 10.09      |
| 2092 | Orchidaceae | Bletia purpurea | 11.98      |
| 2093 | Orchidaceae | Bletia purpurea | 11.54      |
| 2094 | Orchidaceae | Bletia purpurea | 12.97      |
| 2095 | Orchidaceae | Bletia purpurea | 13.13      |
| 2096 | Orchidaceae | Bletia purpurea | 13.77      |
| 2097 | Orchidaceae | Bletia purpurea | 14.6       |
| 2098 | Orchidaceae | Bletia purpurea | 14.97      |
| 2099 | Orchidaceae | Bletia purpurea | 15.857     |
| 2100 | Orchidaceae | Bletia purpurea | 15.701     |
| 2101 | Orchidaceae | Bletia purpurea | 15.446     |
| 2102 | Orchidaceae | Bletia purpurea | 15.684     |
| 2103 | Orchidaceae | Bletia purpurea | 15.927     |
| 2104 | Orchidaceae | Bletia purpurea | 15.52      |
| 2105 | Orchidaceae | Bletia purpurea | 16.967     |
| 2106 | Orchidaceae | Bletia purpurea | 16.68444   |
| 2107 | Orchidaceae | Bletia purpurea | 16.7508333 |
| 2108 | Orchidaceae | Bletia purpurea | 16.312     |
| 2109 | Orchidaceae | Bletia purpurea | 16.8086111 |
| 2110 | Orchidaceae | Bletia purpurea | 16.83      |
| 2111 | Orchidaceae | Bletia purpurea | 16.738     |
| 2112 | Orchidaceae | Bletia purpurea | 16.03333   |
| 2113 | Orchidaceae | Bletia purpurea | 16.7722222 |
| 2114 | Orchidaceae | Bletia purpurea | 16.87      |
| 2115 | Orchidaceae | Bletia purpurea | 16.94      |
| 2116 | Orchidaceae | Bletia purpurea | 17.177     |
| 2117 | Orchidaceae | Bletia purpurea | 17.1805556 |
| 2118 | Orchidaceae | Bletia purpurea | 17.8244444 |
| 2119 | Orchidaceae | Bletia purpurea | 17.267     |

|      |             |                 |            |
|------|-------------|-----------------|------------|
| 2120 | Orchidaceae | Bletia purpurea | 17.1877778 |
| 2121 | Orchidaceae | Bletia purpurea | 17.3513889 |
| 2122 | Orchidaceae | Bletia purpurea | 17.229     |
| 2123 | Orchidaceae | Bletia purpurea | 17.21      |
| 2124 | Orchidaceae | Bletia purpurea | 17.983     |
| 2125 | Orchidaceae | Bletia purpurea | 17.767     |
| 2126 | Orchidaceae | Bletia purpurea | 17.384     |
| 2127 | Orchidaceae | Bletia purpurea | 17.99778   |
| 2128 | Orchidaceae | Bletia purpurea | 17.9305556 |
| 2129 | Orchidaceae | Bletia purpurea | 17.83      |
| 2130 | Orchidaceae | Bletia purpurea | 18.63      |
| 2131 | Orchidaceae | Bletia purpurea | 18.334     |
| 2132 | Orchidaceae | Bletia purpurea | 18.84      |
| 2133 | Orchidaceae | Bletia purpurea | 18.6166667 |
| 2134 | Orchidaceae | Bletia purpurea | 18.55      |
| 2135 | Orchidaceae | Bletia purpurea | 18.783     |
| 2136 | Orchidaceae | Bletia purpurea | 18.905     |
| 2137 | Orchidaceae | Bletia purpurea | 18.24056   |
| 2138 | Orchidaceae | Bletia purpurea | 18.45      |
| 2139 | Orchidaceae | Bletia purpurea | 18.59      |
| 2140 | Orchidaceae | Bletia purpurea | 18.585     |
| 2141 | Orchidaceae | Bletia purpurea | 18.272     |
| 2142 | Orchidaceae | Bletia purpurea | 18.10333   |
| 2143 | Orchidaceae | Bletia purpurea | 18.1836111 |
| 2144 | Orchidaceae | Bletia purpurea | 18         |
| 2145 | Orchidaceae | Bletia purpurea | 18.54      |
| 2146 | Orchidaceae | Bletia purpurea | 18.09667   |
| 2147 | Orchidaceae | Bletia purpurea | 18.352     |
| 2148 | Orchidaceae | Bletia purpurea | 18.172     |
| 2149 | Orchidaceae | Bletia purpurea | 18.6125    |
| 2150 | Orchidaceae | Bletia purpurea | 18.2466667 |
| 2151 | Orchidaceae | Bletia purpurea | 18.8105556 |
| 2152 | Orchidaceae | Bletia purpurea | 18.97      |
| 2153 | Orchidaceae | Bletia purpurea | 19.602     |
| 2154 | Orchidaceae | Bletia purpurea | 19.5083333 |
| 2155 | Orchidaceae | Bletia purpurea | 19.808     |
| 2156 | Orchidaceae | Bletia purpurea | 19.1183333 |
| 2157 | Orchidaceae | Bletia purpurea | 19.93      |
| 2158 | Orchidaceae | Bletia purpurea | 19.383     |
| 2159 | Orchidaceae | Bletia purpurea | 19.0472222 |
| 2160 | Orchidaceae | Bletia purpurea | 19.203     |
| 2161 | Orchidaceae | Bletia purpurea | 19.328     |
| 2162 | Orchidaceae | Bletia purpurea | 19.4805556 |
| 2163 | Orchidaceae | Bletia purpurea | 19.21      |
| 2164 | Orchidaceae | Bletia purpurea | 19.52      |

|      |             |                 |            |
|------|-------------|-----------------|------------|
| 2165 | Orchidaceae | Bletia purpurea | 20.392     |
| 2166 | Orchidaceae | Bletia purpurea | 20.512     |
| 2167 | Orchidaceae | Bletia purpurea | 20.767     |
| 2168 | Orchidaceae | Bletia purpurea | 20.3002778 |
| 2169 | Orchidaceae | Bletia purpurea | 20.39      |
| 2170 | Orchidaceae | Bletia purpurea | 20.520303  |
| 2171 | Orchidaceae | Bletia purpurea | 21.212     |
| 2172 | Orchidaceae | Bletia purpurea | 21.8605556 |
| 2173 | Orchidaceae | Bletia purpurea | 21.1875    |
| 2174 | Orchidaceae | Bletia purpurea | 21.398     |
| 2175 | Orchidaceae | Bletia purpurea | 21.15      |
| 2176 | Orchidaceae | Bletia purpurea | 21.717     |
| 2177 | Orchidaceae | Bletia purpurea | 22.25      |
| 2178 | Orchidaceae | Bletia purpurea | 22.58      |
| 2179 | Orchidaceae | Bletia purpurea | 22.05      |
| 2180 | Orchidaceae | Bletia purpurea | 22.227     |
| 2181 | Orchidaceae | Bletia purpurea | 23.389     |
| 2182 | Orchidaceae | Bletia purpurea | 26.98333   |
| 2183 | Orchidaceae | Bletia riparia  | 19.282     |
| 2184 | Orchidaceae | Bletia riparia  | 19.21      |
| 2185 | Orchidaceae | Bletia roezlii  | 18.587004  |
| 2186 | Orchidaceae | Bletia roezlii  | 18.996262  |
| 2187 | Orchidaceae | Bletia roezlii  | 17.120783  |
| 2188 | Orchidaceae | Bletia roezlii  | 20.438385  |
| 2189 | Orchidaceae | Bletia roezlii  | 19.248843  |
| 2190 | Orchidaceae | Bletia roezlii  | 17.558369  |
| 2191 | Orchidaceae | Bletia roezlii  | 18.593631  |
| 2192 | Orchidaceae | Bletia roezlii  | 17.289807  |
| 2193 | Orchidaceae | Bletia roezlii  | 19.877795  |
| 2194 | Orchidaceae | Bletia roezlii  | 20.753742  |
| 2195 | Orchidaceae | Bletia roezlii  | 18.793935  |
| 2196 | Orchidaceae | Bletia roezlii  | 18.921152  |
| 2197 | Orchidaceae | Bletia roezlii  | 19.861021  |
| 2198 | Orchidaceae | Bletia roezlii  | 19.31      |
| 2199 | Orchidaceae | Bletia roezlii  | 18.590713  |
| 2200 | Orchidaceae | Bletia roezlii  | 21.355274  |
| 2201 | Orchidaceae | Bletia roezlii  | 12.98      |
| 2202 | Orchidaceae | Bletia roezlii  | 13.95      |
| 2203 | Orchidaceae | Bletia roezlii  | 13.37      |
| 2204 | Orchidaceae | Bletia roezlii  | 14.33      |
| 2205 | Orchidaceae | Bletia roezlii  | 14.13      |
| 2206 | Orchidaceae | Bletia roezlii  | 14.56      |
| 2207 | Orchidaceae | Bletia roezlii  | 16.03361   |
| 2208 | Orchidaceae | Bletia roezlii  | 16.567     |
| 2209 | Orchidaceae | Bletia roezlii  | 17.266     |



|      |               |                   |            |
|------|---------------|-------------------|------------|
| 2210 | Orchidaceae   | Bletia roezlii    | 18.963     |
| 2211 | Orchidaceae   | Bletia roezlii    | 18.88      |
| 2212 | Orchidaceae   | Bletia roezlii    | 18.918     |
| 2213 | Orchidaceae   | Bletia roezlii    | 18.467     |
| 2214 | Orchidaceae   | Bletia roezlii    | 18.62      |
| 2215 | Orchidaceae   | Bletia roezlii    | 18.857     |
| 2216 | Orchidaceae   | Bletia roezlii    | 18.98      |
| 2217 | Orchidaceae   | Bletia roezlii    | 18.828     |
| 2218 | Orchidaceae   | Bletia roezlii    | 19.529     |
| 2219 | Orchidaceae   | Bletia roezlii    | 19.567     |
| 2220 | Orchidaceae   | Bletia roezlii    | 19.107     |
| 2221 | Orchidaceae   | Bletia roezlii    | 20.195     |
| 2222 | Orchidaceae   | Bletia roezlii    | 20.648     |
| 2223 | Orchidaceae   | Bletia roezlii    | 20.388     |
| 2224 | Orchidaceae   | Bletia roezlii    | 21.35      |
| 2225 | Orchidaceae   | Bletia roezlii    | 21.11      |
| 2226 | Orchidaceae   | Bletia roezlii    | 22.251     |
| 2227 | Orchidaceae   | Bletia roezlii    | 23.938     |
| 2228 | Orchidaceae   | Bletia roezlii    | 24.167     |
| 2229 | Orchidaceae   | Bletia roezlii    | 25.824     |
| 2230 | Orchidaceae   | Bletia roezlii    | 27.3       |
| 2231 | Orchidaceae   | Bletia roezlii    | 28.408     |
| 2232 | Orchidaceae   | Bletia urbana     | 19.31      |
| 2233 | Orchidaceae   | Bletia urbana     | 16.254132  |
| 2234 | Orchidaceae   | Bletia urbana     | 19.329     |
| 2235 | Orchidaceae   | Bletia urbana     | 19.31      |
| 2236 | Orchidaceae   | Bletia urbana     | 19.367     |
| 2237 | Orchidaceae   | Bletia urbana     | 23         |
| 2238 | Orchidaceae   | Bletia tenuifolia | 16.906     |
| 2239 | Orchidaceae   | Bletia tenuifolia | 16.679     |
| 2240 | Orchidaceae   | Bletia tenuifolia | 16.1       |
| 2241 | Orchidaceae   | Bletia tenuifolia | 16.69      |
| 2242 | Orchidaceae   | Bletia tenuifolia | 16.659     |
| 2243 | Orchidaceae   | Bletia tenuifolia | 17.277     |
| 2244 | Orchidaceae   | Bletia tenuifolia | 17.5538889 |
| 2245 | Orchidaceae   | Bletia nelsonii   | 16.917     |
| 2246 | Orchidaceae   | Bletia nelsonii   | 17.4       |
| 2247 | Orchidaceae   | Bletia concolor   | 19.457751  |
| 2248 | Orchidaceae   | Bletia concolor   | 18.4144    |
| 2249 | Commelinaceae | Weldenia candida  | 16.133     |
| 2250 | Commelinaceae | Weldenia candida  | 17.121     |
| 2251 | Commelinaceae | Weldenia candida  | 19.782     |
| 2252 | Commelinaceae | Weldenia candida  | 19.65      |
| 2253 | Commelinaceae | Weldenia candida  | 19.283     |
| 2254 | Commelinaceae | Weldenia candida  | 19.31666   |

|      |               |                          |            |
|------|---------------|--------------------------|------------|
| 2255 | Commelinaceae | Weldenia candida         | 15.4272223 |
| 2256 | Commelinaceae | Weldenia candida         | 19.01666   |
| 2257 | Commelinaceae | Weldenia candida         | 15.53611   |
| 2258 | Commelinaceae | Weldenia candida         | 14.75972   |
| 2259 | Dioscoreaceae | Dioscorea palmeri        | 18.77      |
| 2260 | Dioscoreaceae | Dioscorea palmeri        | 19.53      |
| 2261 | Dioscoreaceae | Dioscorea palmeri        | 19.495     |
| 2262 | Dioscoreaceae | Dioscorea palmeri        | 19.607     |
| 2263 | Asparagaceae  | Prochnyanthes mexicana   | 20.7333333 |
| 2264 | Asparagaceae  | Prochnyanthes mexicana   | 20.7774389 |
| 2265 | Asparagaceae  | Prochnyanthes mexicana   | 21.45527   |
| 2266 | Asparagaceae  | Prochnyanthes mexicana   | 22.41666   |
| 2267 | Asparagaceae  | Echeandia albiflora      | 18.12      |
| 2268 | Asparagaceae  | Echeandia atoyacana      | 17.2       |
| 2269 | Asparagaceae  | Echeandia breedlovei     | 16.9019444 |
| 2270 | Asparagaceae  | Echeandia breedlovei     | 16.68444   |
| 2271 | Asparagaceae  | Echeandia campechiana    | 19.07      |
| 2272 | Asparagaceae  | Echeandia coalcomanensis | 18.793479  |
| 2273 | Asparagaceae  | Echeandia konzattii      | 17.325441  |
| 2274 | Asparagaceae  | Echeandia drepanoides    | 17.131176  |
| 2275 | Asparagaceae  | Echeandia drepanoides    | 17.018143  |
| 2276 | Asparagaceae  | Echeandia durangensis    | 25.03      |
| 2277 | Asparagaceae  | Echeandia durangensis    | 18.9633333 |
| 2278 | Asparagaceae  | Echeandia durangensis    | 25.1       |
| 2279 | Asparagaceae  | Echeandia echeandioides  | 19.2233334 |
| 2280 | Asparagaceae  | Echeandia echeandioides  | 17         |
| 2281 | Asparagaceae  | Echeandia echeandioides  | 19.667     |
| 2282 | Asparagaceae  | Echeandia echeandioides  | 19.361     |
| 2283 | Asparagaceae  | Echeandia echeandioides  | 19.183     |
| 2284 | Asparagaceae  | Echeandia echeandioides  | 18.683     |
| 2285 | Asparagaceae  | Echeandia echeandioides  | 21.15      |
| 2286 | Asparagaceae  | Echeandia echeandioides  | 17.97      |
| 2287 | Asparagaceae  | Echeandia echeandioides  | 18.84      |
| 2288 | Asparagaceae  | Echeandia elegans        | 17.713826  |
| 2289 | Asparagaceae  | Echeandia flavescens     | 21.809     |
| 2290 | Asparagaceae  | Echeandia flavescens     | 25.445     |
| 2291 | Asparagaceae  | Echeandia flavescens     | 19.903     |
| 2292 | Asparagaceae  | Echeandia flavescens     | 18.983     |
| 2293 | Asparagaceae  | Echeandia flavescens     | 20.642     |
| 2294 | Asparagaceae  | Echeandia flavescens     | 21.76      |
| 2295 | Asparagaceae  | Echeandia flavescens     | 25.01      |
| 2296 | Asparagaceae  | Echeandia flavescens     | 23.82      |
| 2297 | Asparagaceae  | Echeandia flavescens     | 25.06666   |
| 2298 | Asparagaceae  | Echeandia flavescens     | 19.5133333 |
| 2299 | Asparagaceae  | Echeandia flavescens     | 19.4802778 |

|      |              |                            |            |
|------|--------------|----------------------------|------------|
| 2300 | Asparagaceae | Echeandia flavescens       | 19.1164444 |
| 2301 | Asparagaceae | Echeandia flexuosa         | 20.99      |
| 2302 | Asparagaceae | Echeandia flexuosa         | 21         |
| 2303 | Asparagaceae | Echeandia flexuosa         | 22.57      |
| 2304 | Asparagaceae | Echeandia flexuosa         | 23.767     |
| 2305 | Asparagaceae | Echeandia flexuosa         | 20.72      |
| 2306 | Asparagaceae | Echeandia flexuosa         | 18.937     |
| 2307 | Asparagaceae | Echeandia flexuosa         | 20.202     |
| 2308 | Asparagaceae | Echeandia flexuosa         | 19.017     |
| 2309 | Asparagaceae | Echeandia flexuosa         | 16.933     |
| 2310 | Asparagaceae | Echeandia flexuosa         | 17.599     |
| 2311 | Asparagaceae | Echeandia formosa          | 16.5333333 |
| 2312 | Asparagaceae | Echeandia formosa          | 16.2       |
| 2313 | Asparagaceae | Echeandia gentryi          | 19.967     |
| 2314 | Asparagaceae | Echeandia gracilis         | 19.34      |
| 2315 | Asparagaceae | Echeandia gracilis         | 19.132     |
| 2316 | Asparagaceae | Echeandia gracilis         | 19.308     |
| 2317 | Asparagaceae | Echeandia grandiflora      | 16.448413  |
| 2318 | Asparagaceae | Echeandia hallbergii       | 17.3       |
| 2319 | Asparagaceae | Echeandia hallbergii       | 17.151053  |
| 2320 | Asparagaceae | Echeandia hintonii         | 17.597317  |
| 2321 | Asparagaceae | Echeandia hirticaulis      | 19.043     |
| 2322 | Asparagaceae | Echeandia imbricata        | 18.499     |
| 2323 | Asparagaceae | Echeandia imbricata        | 20.381     |
| 2324 | Asparagaceae | Echeandia llanicola        | 17.443     |
| 2325 | Asparagaceae | Echeandia longifolia       | 16.93      |
| 2326 | Asparagaceae | Echeandia longipedicellata | 19.733     |
| 2327 | Asparagaceae | Echeandia longipedicellata | 19.667     |
| 2328 | Asparagaceae | Echeandia longipedicellata | 22.933     |
| 2329 | Asparagaceae | Echeandia longipedicellata | 22.95      |
| 2330 | Asparagaceae | Echeandia longipedicellata | 19.375     |
| 2331 | Asparagaceae | Echeandia luteola          | 19.6147222 |
| 2332 | Asparagaceae | Echeandia luteola          | 20.08      |
| 2333 | Asparagaceae | Echeandia luteola          | 20.55      |
| 2334 | Asparagaceae | Echeandia luteola          | 21.44      |
| 2335 | Asparagaceae | Echeandia luteola          | 20.64      |
| 2336 | Asparagaceae | Echeandia luteola          | 20.701     |
| 2337 | Asparagaceae | Echeandia luteola          | 20.459     |
| 2338 | Asparagaceae | Echeandia magnifica        | 17.564     |
| 2339 | Asparagaceae | Echeandia magnifica        | 17.564     |
| 2340 | Asparagaceae | Echeandia mexiae           | 19.886952  |
| 2341 | Asparagaceae | Echeandia mexiae           | 18.87642   |
| 2342 | Asparagaceae | Echeandia mexicana         | 19.3216667 |
| 2343 | Asparagaceae | Echeandia mexicana         | 19.1616667 |
| 2344 | Asparagaceae | Echeandia mexicana         | 19.3166667 |

|      |              |                           |            |
|------|--------------|---------------------------|------------|
| 2345 | Asparagaceae | Echeandia mexicana        | 19.87      |
| 2346 | Asparagaceae | Echeandia mexicana        | 20.75      |
| 2347 | Asparagaceae | Echeandia mexicana        | 19.1791667 |
| 2348 | Asparagaceae | Echeandia mexicana        | 19.0430555 |
| 2349 | Asparagaceae | Echeandia mexicana        | 18.69      |
| 2350 | Asparagaceae | Echeandia mexicana        | 19.4977777 |
| 2351 | Asparagaceae | Echeandia mexicana        | 19.1329445 |
| 2352 | Asparagaceae | Echeandia mexicana        | 19.6102778 |
| 2353 | Asparagaceae | Echeandia mexicana        | 19.49      |
| 2354 | Asparagaceae | Echeandia mexicana        | 22.41666   |
| 2355 | Asparagaceae | Echeandia mexicana        | 24.61      |
| 2356 | Asparagaceae | Echeandia mexicana        | 24.55      |
| 2357 | Asparagaceae | Echeandia mexicana        | 23.28      |
| 2358 | Asparagaceae | Echeandia mexicana        | 28.407     |
| 2359 | Asparagaceae | Echeandia mirandae        | 17.059094  |
| 2360 | Asparagaceae | Echeandia montealbanensis | 17.04555   |
| 2361 | Asparagaceae | Echeandia nana            | 19.3236111 |
| 2362 | Asparagaceae | Echeandia nana            | 19.3388889 |
| 2363 | Asparagaceae | Echeandia nana            | 19.2730556 |
| 2364 | Asparagaceae | Echeandia nana            | 19.72      |
| 2365 | Asparagaceae | Echeandia nana            | 19.56      |
| 2366 | Asparagaceae | Echeandia nana            | 19.6311111 |
| 2367 | Asparagaceae | Echeandia nana            | 18.84      |
| 2368 | Asparagaceae | Echeandia nana            | 22.05      |
| 2369 | Asparagaceae | Echeandia nana            | 19.61666   |
| 2370 | Asparagaceae | Echeandia oaxacana        | 16.960923  |
| 2371 | Asparagaceae | Echeandia occidentalis    | 19.45      |
| 2372 | Asparagaceae | Echeandia occidentalis    | 19.56      |
| 2373 | Asparagaceae | Echeandia occidentalis    | 21.33      |
| 2374 | Asparagaceae | Echeandia occidentalis    | 21.43222   |
| 2375 | Asparagaceae | Echeandia occidentalis    | 19.745     |
| 2376 | Asparagaceae | Echeandia occidentalis    | 20.723     |
| 2377 | Asparagaceae | Echeandia occidentalis    | 21.865     |
| 2378 | Asparagaceae | Echeandia occidentalis    | 20.95      |
| 2379 | Asparagaceae | Echeandia occidentalis    | 22.25      |
| 2380 | Asparagaceae | Echeandia occidentalis    | 21.47      |
| 2381 | Asparagaceae | Echeandia occidentalis    | 22.078     |
| 2382 | Asparagaceae | Echeandia palmeri         | 28.4       |
| 2383 | Asparagaceae | Echeandia paniculata      | 19.2838889 |
| 2384 | Asparagaceae | Echeandia paniculata      | 18.91      |
| 2385 | Asparagaceae | Echeandia paniculata      | 23.966667  |
| 2386 | Asparagaceae | Echeandia paniculata      | 17.501     |
| 2387 | Asparagaceae | Echeandia paniculata      | 21.322     |
| 2388 | Asparagaceae | Echeandia paniculata      | 19.013     |
| 2389 | Asparagaceae | Echeandia paniculata      | 19.815     |

|      |              |                          |            |
|------|--------------|--------------------------|------------|
| 2390 | Asparagaceae | Echeandia paniculata     | 20.088     |
| 2391 | Asparagaceae | Echeandia paniculata     | 19.325     |
| 2392 | Asparagaceae | Echeandia paniculata     | 18.987     |
| 2393 | Asparagaceae | Echeandia parva          | 17.75      |
| 2394 | Asparagaceae | Echeandia parva          | 17.839     |
| 2395 | Asparagaceae | Echeandia parvicapsulata | 19.32      |
| 2396 | Asparagaceae | Echeandia parvicapsulata | 19.86      |
| 2397 | Asparagaceae | Echeandia parvicapsulata | 19.237     |
| 2398 | Asparagaceae | Echeandia parviflora     | 16.7972222 |
| 2399 | Asparagaceae | Echeandia parviflora     | 16.8002778 |
| 2400 | Asparagaceae | Echeandia parviflora     | 17.48      |
| 2401 | Asparagaceae | Echeandia parviflora     | 16.8880555 |
| 2402 | Asparagaceae | Echeandia parviflora     | 17.3       |
| 2403 | Asparagaceae | Echeandia parviflora     | 18.983     |
| 2404 | Asparagaceae | Echeandia parviflora     | 19.033     |
| 2405 | Asparagaceae | Echeandia parviflora     | 19.556     |
| 2406 | Asparagaceae | Echeandia parviflora     | 19.032     |
| 2407 | Asparagaceae | Echeandia parviflora     | 18.345     |
| 2408 | Asparagaceae | Echeandia parviflora     | 18.185     |
| 2409 | Asparagaceae | Echeandia parviflora     | 18.469     |
| 2410 | Asparagaceae | Echeandia parviflora     | 19.556     |
| 2411 | Asparagaceae | Echeandia parviflora     | 18.272     |
| 2412 | Asparagaceae | Echeandia parviflora     | 17.734     |
| 2413 | Asparagaceae | Echeandia pseudoreflexa  | 16.16      |
| 2414 | Asparagaceae | Echeandia ramosissima    | 22.33333   |
| 2415 | Asparagaceae | Echeandia ramosissima    | 22.3       |
| 2416 | Asparagaceae | Echeandia ramosissima    | 28.3033333 |
| 2417 | Asparagaceae | Echeandia ramosissima    | 22.251     |
| 2418 | Asparagaceae | Echeandia ramosissima    | 23.967     |
| 2419 | Asparagaceae | Echeandia ramosissima    | 25.709     |
| 2420 | Asparagaceae | Echeandia ramosissima    | 24.258     |
| 2421 | Asparagaceae | Echeandia ramosissima    | 27.3       |
| 2422 | Asparagaceae | Echeandia ramosissima    | 22.33      |
| 2423 | Asparagaceae | Echeandia ramosissima    | 28.467     |
| 2424 | Asparagaceae | Echeandia ramosissima    | 29.306     |
| 2425 | Asparagaceae | Echeandia ramosissima    | 28.483     |
| 2426 | Asparagaceae | Echeandia reflexa        | 18.9816667 |
| 2427 | Asparagaceae | Echeandia reflexa        | 19.6       |
| 2428 | Asparagaceae | Echeandia reflexa        | 19.3       |
| 2429 | Asparagaceae | Echeandia reflexa        | 23.966667  |
| 2430 | Asparagaceae | Echeandia reflexa        | 16.2       |
| 2431 | Asparagaceae | Echeandia scabrella      | 21.04      |
| 2432 | Asparagaceae | Echeandia scabrella      | 23.848     |
| 2433 | Asparagaceae | Echeandia scabrella      | 21.323     |
| 2434 | Asparagaceae | Echeandia scabrella      | 21.268     |

|      |              |                        |            |
|------|--------------|------------------------|------------|
| 2435 | Asparagaceae | Echeandia scabrella    | 20.67      |
| 2436 | Asparagaceae | Echeandia scabrella    | 21.248     |
| 2437 | Asparagaceae | Echeandia sinaloensis  | 19.517     |
| 2438 | Asparagaceae | Echeandia skinneri     | 16.13      |
| 2439 | Asparagaceae | Echeandia skinneri     | 16.85      |
| 2440 | Asparagaceae | Echeandia skinneri     | 24.4       |
| 2441 | Asparagaceae | Echeandia skinneri     | 15.993     |
| 2442 | Asparagaceae | Echeandia skinneri     | 18.212     |
| 2443 | Asparagaceae | Echeandia skinneri     | 18.263     |
| 2444 | Asparagaceae | Echeandia skinneri     | 18.306     |
| 2445 | Asparagaceae | Echeandia skinneri     | 19.589     |
| 2446 | Asparagaceae | Echeandia skinneri     | 19.535     |
| 2447 | Asparagaceae | Echeandia skinneri     | 20.335     |
| 2448 | Asparagaceae | Echeandia skinneri     | 16.73      |
| 2449 | Asparagaceae | Echeandia skinneri     | 23.91      |
| 2450 | Asparagaceae | Echeandia skinneri     | 22.21      |
| 2451 | Asparagaceae | Echeandia skinneri     | 19.13      |
| 2452 | Asparagaceae | Echeandia skinneri     | 17.38      |
| 2453 | Asparagaceae | Echeandia skinneri     | 19.09      |
| 2454 | Asparagaceae | Echeandia skinneri     | 20.14      |
| 2455 | Asparagaceae | Echeandia skinneri     | 19.02      |
| 2456 | Asparagaceae | Echeandia smithi       | 17.259843  |
| 2457 | Asparagaceae | Echeandia taxacana     | 17.226     |
| 2458 | Asparagaceae | Echeandia tenuifolia   | 17.755     |
| 2459 | Asparagaceae | Echeandia tenuis       | 17.584     |
| 2460 | Asparagaceae | Echeandia tenuis       | 18.9       |
| 2461 | Asparagaceae | Echeandia tenuis       | 19         |
| 2462 | Asparagaceae | Echeandia udipratensis | 19.956     |
| 2463 | Asparagaceae | Echeandia udipratensis | 19.913     |
| 2464 | Asparagaceae | Echeandia vaginata     | 16.339443  |
| 2465 | Asparagaceae | Echeandia vestita      | 19.5616667 |
| 2466 | Asparagaceae | Echeandia vestita      | 17.58472   |
| 2467 | Asparagaceae | Echeandia vestita      | 16.82      |
| 2468 | Asparagaceae | Echeandia vestita      | 16.843     |
| 2469 | Asparagaceae | Echeandia vestita      | 19.895     |
| 2470 | Asparagaceae | Echeandia vestita      | 17.105     |
| 2471 | Asparagaceae | Echeandia vestita      | 16.933     |
| 2472 | Asparagaceae | Echeandia vestita      | 16.923     |
| 2473 | Asparagaceae | Echeandia vestita      | 16.468     |
| 2474 | Asparagaceae | Echeandia vestita      | 17.346     |
| 2475 | Asparagaceae | Echeandia vestita      | 19.677     |
| 2476 | Asparagaceae | Echeandia vestita      | 19.55      |
| 2477 | Asparagaceae | Echeandia vestita      | 19.73      |
| 2478 | Asparagaceae | Echeandia vestita      | 19.628     |
| 2479 | Asparagaceae | Echeandia vestita      | 18.817     |

|      |              |                        |            |
|------|--------------|------------------------|------------|
| 2480 | Asparagaceae | Echeandia vestita      | 18.717     |
| 2481 | Asparagaceae | Echeandia vestita      | 19.333     |
| 2482 | Asparagaceae | Polianthes bicolor     | 17.6872    |
| 2483 | Asparagaceae | Polianthes bicolor     | 17.670957  |
| 2484 | Asparagaceae | Polianthes densiflora  | 27.739     |
| 2485 | Asparagaceae | Polianthes densiflora  | 27.725     |
| 2486 | Asparagaceae | Polianthes densiflora  | 27.274     |
| 2487 | Asparagaceae | Polianthes durangensis | 23.5       |
| 2488 | Asparagaceae | Polianthes durangensis | 23.416     |
| 2489 | Asparagaceae | Polianthes durangensis | 23.393     |
| 2490 | Asparagaceae | Polianthes geminiflora | 19.5916666 |
| 2491 | Asparagaceae | Polianthes geminiflora | 20.03      |
| 2492 | Asparagaceae | Polianthes geminiflora | 20.8       |
| 2493 | Asparagaceae | Polianthes geminiflora | 19.025     |
| 2494 | Asparagaceae | Polianthes geminiflora | 18.86      |
| 2495 | Asparagaceae | Polianthes geminiflora | 19.3133333 |
| 2496 | Asparagaceae | Polianthes geminiflora | 19.1135    |
| 2497 | Asparagaceae | Polianthes geminiflora | 18.79      |
| 2498 | Asparagaceae | Polianthes geminiflora | 19.5616667 |
| 2499 | Asparagaceae | Polianthes geminiflora | 17.93      |
| 2500 | Asparagaceae | Polianthes geminiflora | 22.5333333 |
| 2501 | Asparagaceae | Polianthes tuberosa    | 19.354     |
| 2502 | Asparagaceae | Polianthes tuberosa    | 18.736     |
| 2503 | Asparagaceae | Polianthes tuberosa    | 18.624     |
| 2504 | Asparagaceae | Polianthes tuberosa    | 18.6       |
| 2505 | Asparagaceae | Polianthes tuberosa    | 19.5       |
| 2506 | Asparagaceae | Polianthes tuberosa    | 18.673     |
| 2507 | Asparagaceae | Polianthes tuberosa    | 18.453     |
| 2508 | Asparagaceae | Polianthes tuberosa    | 17.05      |
| 2509 | Asparagaceae | Polianthes tuberosa    | 19.056967  |
| 2510 | Asparagaceae | Polianthes longiflora  | 19.516     |
| 2511 | Asparagaceae | Polianthes longiflora  | 20.324     |
| 2512 | Asparagaceae | Polianthes longiflora  | 19.652     |
| 2513 | Asparagaceae | Polianthes longiflora  | 20.502     |
| 2514 | Asparagaceae | Polianthes longiflora  | 20.438     |
| 2515 | Asparagaceae | Polianthes longiflora  | 20.324     |
| 2516 | Asparagaceae | Polianthes longiflora  | 20.502     |
| 2517 | Asparagaceae | Polianthes longiflora  | 20.202     |
| 2518 | Asparagaceae | Polianthes longiflora  | 20.9       |
| 2519 | Asparagaceae | Polianthes longiflora  | 19.503     |
| 2520 | Asparagaceae | Polianthes longiflora  | 20.698     |
| 2521 | Asparagaceae | Polianthes longiflora  | 19.672     |
| 2522 | Asparagaceae | Polianthes longiflora  | 19.4       |
| 2523 | Asparagaceae | Polianthes longiflora  | 20.48      |
| 2524 | Asparagaceae | Polianthes montana     | 21.347     |

|      |              |                        |            |
|------|--------------|------------------------|------------|
| 2525 | Asparagaceae | Polianthes montana     | 20.05      |
| 2526 | Asparagaceae | Polianthes montana     | 19.983     |
| 2527 | Asparagaceae | Polianthes montana     | 20.05      |
| 2528 | Asparagaceae | Polianthes montana     | 19.367     |
| 2529 | Asparagaceae | Polianthes montana     | 21.005     |
| 2530 | Asparagaceae | Polianthes montana     | 21.455     |
| 2531 | Asparagaceae | Polianthes montana     | 21.362     |
| 2532 | Asparagaceae | Polianthes montana     | 20.043     |
| 2533 | Asparagaceae | Polianthes montana     | 21.931     |
| 2534 | Asparagaceae | Polianthes montana     | 22.491     |
| 2535 | Asparagaceae | Polianthes montana     | 20.718     |
| 2536 | Asparagaceae | Polianthes multicolor  | 21.462     |
| 2537 | Asparagaceae | Polianthes nelsoni     | 23.91      |
| 2538 | Asparagaceae | Polianthes nelsoni     | 23.86666   |
| 2539 | Asparagaceae | Polianthes nelsoni     | 24.05      |
| 2540 | Asparagaceae | Polianthes nelsoni     | 23         |
| 2541 | Asparagaceae | Polianthes oaxacana    | 16.765016  |
| 2542 | Asparagaceae | Polianthes oaxacana    | 16.734     |
| 2543 | Asparagaceae | Polianthes palustris   | 22.224     |
| 2544 | Asparagaceae | Polianthes palustris   | 20.806     |
| 2545 | Asparagaceae | Polianthes palustris   | 20.912     |
| 2546 | Asparagaceae | Polianthes palustris   | 22.311     |
| 2547 | Asparagaceae | Polianthes palustris   | 20.942     |
| 2548 | Asparagaceae | Polianthes palustris   | 22.345     |
| 2549 | Asparagaceae | Polianthes palustris   | 23.917     |
| 2550 | Asparagaceae | Polianthes palustris   | 22.365     |
| 2551 | Asparagaceae | Polianthes palustris   | 20.973     |
| 2552 | Asparagaceae | Polianthes palustris   | 21.917     |
| 2553 | Asparagaceae | Polianthes palustris   | 22.267     |
| 2554 | Asparagaceae | Polianthes palustris   | 21.835     |
| 2555 | Asparagaceae | Polianthes palustris   | 21.25      |
| 2556 | Asparagaceae | Polianthes palustris   | 23.5       |
| 2557 | Asparagaceae | Polianthes palustris   | 18.926     |
| 2558 | Asparagaceae | Polianthes palustris   | 24.041     |
| 2559 | Asparagaceae | Polianthes palustris   | 23.967     |
| 2560 | Asparagaceae | Polianthes platyphylla | 22.31666   |
| 2561 | Asparagaceae | Polianthes platyphylla | 22.3042778 |
| 2562 | Asparagaceae | Polianthes platyphylla | 22.456     |
| 2563 | Asparagaceae | Polianthes platyphylla | 20.948     |
| 2564 | Asparagaceae | Polianthes platyphylla | 22.338     |
| 2565 | Asparagaceae | Polianthes platyphylla | 20.95      |
| 2566 | Asparagaceae | Polianthes platyphylla | 22.464     |
| 2567 | Asparagaceae | Polianthes platyphylla | 23.68      |
| 2568 | Asparagaceae | Polianthes platyphylla | 20.912     |
| 2569 | Asparagaceae | Polianthes platyphylla | 20.811     |



|      |              |                         |            |
|------|--------------|-------------------------|------------|
| 2570 | Asparagaceae | Polianthes platyphylla  | 22.685     |
| 2571 | Asparagaceae | Polianthes platyphylla  | 22.317     |
| 2572 | Asparagaceae | Polianthes platyphylla  | 20.973     |
| 2573 | Asparagaceae | Polianthes platyphylla  | 21.772     |
| 2574 | Asparagaceae | Polianthes platyphylla  | 22.365     |
| 2575 | Asparagaceae | Polianthes pringlei     | 21.33333   |
| 2576 | Asparagaceae | Polianthes pringlei     | 22.5       |
| 2577 | Asparagaceae | Polianthes pringlei     | 22.21666   |
| 2578 | Asparagaceae | Polianthes pringlei     | 20.935     |
| 2579 | Asparagaceae | Polianthes pringlei     | 23.911     |
| 2580 | Asparagaceae | Polianthes sessiliflora | 19.51      |
| 2581 | Asparagaceae | Polianthes sessiliflora | 20.907     |
| 2582 | Asparagaceae | Polianthes sessiliflora | 22.5       |
| 2583 | Asparagaceae | Polianthes sessiliflora | 22.913     |
| 2584 | Asparagaceae | Polianthes sessiliflora | 21.845     |
| 2585 | Asparagaceae | Polianthes sessiliflora | 21.517     |
| 2586 | Asparagaceae | Polianthes sessiliflora | 23         |
| 2587 | Asparagaceae | Polianthes zapopanensis | 20.8177778 |
| 2588 | Asparagaceae | Polianthes michoacana   | 20         |
| 2589 | Iridaceae    | Nemastylis tenuis       | 28.39      |
| 2590 | Iridaceae    | Nemastylis tenuis       | 29.9833    |
| 2591 | Iridaceae    | Nemastylis tenuis       | 26.57      |
| 2592 | Iridaceae    | Nemastylis tenuis       | 28.66666   |
| 2593 | Iridaceae    | Nemastylis tenuis       | 24.05      |
| 2594 | Iridaceae    | Nemastylis tenuis       | 24.0333337 |
| 2595 | Iridaceae    | Nemastylis tenuis       | 23.96      |
| 2596 | Iridaceae    | Nemastylis tenuis       | 25.08333   |
| 2597 | Iridaceae    | Nemastylis tenuis       | 20.81      |
| 2598 | Iridaceae    | Nemastylis tenuis       | 19.5786111 |
| 2599 | Iridaceae    | Nemastylis tenuis       | 18.81666   |
| 2600 | Iridaceae    | Nemastylis tenuis       | 19.5108333 |
| 2601 | Iridaceae    | Nemastylis tenuis       | 16.93      |
| 2602 | Iridaceae    | Nemastylis tenuis       | 22.21666   |
| 2603 | Iridaceae    | Nemastylis tenuis       | 23.74      |
| 2604 | Iridaceae    | Nemastylis tenuis       | 28.269     |
| 2605 | Iridaceae    | Nemastylis tenuis       | 19.346     |
| 2606 | Iridaceae    | Nemastylis tenuis       | 17.121     |
| 2607 | Iridaceae    | Nemastylis tenuis       | 30.951     |
| 2608 | Iridaceae    | Nemastylis tenuis       | 28.24      |
| 2609 | Iridaceae    | Nemastylis tenuis       | 23.756     |
| 2610 | Iridaceae    | Nemastylis tenuis       | 17.121     |
| 2611 | Iridaceae    | Nemastylis tenuis       | 20.967     |
| 2612 | Iridaceae    | Nemastylis tenuis       | 28.413     |
| 2613 | Iridaceae    | Nemastylis tenuis       | 18.952     |
| 2614 | Iridaceae    | Nemastylis tenuis       | 27.972     |

|                  |                       |        |
|------------------|-----------------------|--------|
| 2615 Iridaceae   | Nemastylis tenuis     | 23.938 |
| 2616 Iridaceae   | Nemastylis tenuis     | 21.2   |
| 2617 Iridaceae   | Nemastylis tenuis     | 28.008 |
| 2618 Iridaceae   | Nemastylis tenuis     | 23.983 |
| 2619 Iridaceae   | Nemastylis tenuis     | 23.883 |
| 2620 Iridaceae   | Nemastylis tenuis     | 18.967 |
| 2621 Iridaceae   | Nemastylis tenuis     | 21.133 |
| 2622 Iridaceae   | Nemastylis tenuis     | 22.45  |
| 2623 Iridaceae   | Nemastylis tenuis     | 24.517 |
| 2624 Iridaceae   | Nemastylis tenuis     | 28.239 |
| 2625 Iridaceae   | Nemastylis tenuis     | 23.483 |
| 2626 Iridaceae   | Nemastylis tenuis     | 23.283 |
| 2627 Iridaceae   | Nemastylis tenuis     | 19.452 |
| 2628 Iridaceae   | Nemastylis tenuis     | 23.392 |
| 2629 Iridaceae   | Nemastylis tenuis     | 16.93  |
| 2630 Iridaceae   | Nemastylis tenuis     | 20.083 |
| 2631 Iridaceae   | Nemastylis tenuis     | 23.87  |
| 2632 Iridaceae   | Nemastylis tenuis     | 23.401 |
| 2633 Iridaceae   | Nemastylis tenuis     | 19.827 |
| 2634 Iridaceae   | Nemastylis tenuis     | 23.43  |
| 2635 Iridaceae   | Nemastylis tenuis     | 27.867 |
| 2636 Iridaceae   | Nemastylis tenuis     | 29.98  |
| 2637 Iridaceae   | Nemastylis tenuis     | 18.91  |
| 2638 Iridaceae   | Nemastylis tenuis     | 23     |
| 2639 Orchidaceae | Triphora debilis      | 16.43  |
| 2640 Orchidaceae | Triphora debilis      | 16.12  |
| 2641 Orchidaceae | Triphora debilis      | 16.89  |
| 2642 Orchidaceae | Triphora gentianoides | 18.227 |
| 2643 Orchidaceae | Triphora gentianoides | 16.698 |
| 2644 Orchidaceae | Triphora gentianoides | 17.35  |
| 2645 Orchidaceae | Triphora gentianoides | 17.267 |
| 2646 Orchidaceae | Triphora gentianoides | 20.66  |

**long.**

-106.7466667  
-97.20583333  
-93.14083333  
-97.1625  
-98.77861111  
-98.74083333  
-97.30972222  
-98.74138889  
-97.265  
-98.91222222  
-97.17861111  
-107.775  
-107.3166667  
-107.6416667  
-98.25805556  
-101.76  
-103.105  
-102.5366667  
-103.5433333  
-99.246059  
-101.3433333  
-104.0377778  
-100.66  
-103.893291  
-102.6225  
-100.3580417  
-98.48944444  
-96.939926  
-96.97443  
-96.89638889  
-96.954334  
-96.726102  
-96.99333333  
-96.990824  
-102.2725  
-98.75583333  
-96.9725  
-97.18805556  
-104.6447222  
-98.50583333  
-98.500125  
-98.57833056  
-96.865586

-98.86664167  
-96.65193889  
-98.52671944  
-102.3333333  
-98.52611111  
-91.64278056  
-98.23483333  
-96.3725  
-97  
-104  
-96.45583333  
-98.43333333  
-99.84801667  
-99.85833333  
-99.92583333  
-98.7825  
-103.6833333  
-100.5  
-99.1  
-100.45  
-101.733  
-104.083  
-99.342  
-97.285199  
-92.655677  
-92.613888  
-92.336072  
-97.500138  
-97.520247  
-101.3082028  
-106.19915  
-101.3666667  
-102.4452778  
-99.754144  
-104.47036  
-107.735859  
-115.410256  
-115.604797  
-115.459844  
-115.432658  
-113.35  
-114.85  
-112.8558333  
-101.056123  
-115.8333333

-115.9  
-100.865  
-100.4744444  
-103.8358333  
-100.81  
-102.5705556  
-91.39027778  
-97.992037  
-101.3430556  
-100.4558333  
-97.9725  
-95.323753  
-97.50307  
-96.870347  
-96.72361111  
-97.08916667  
-98.72  
-97.10583333  
-100.9725  
-102.5058333  
-98.75583333  
-97.48916667  
-97.00583333  
-99.68916667  
-97.33916667  
-99.80583333  
-99.3725  
-100.9725  
-91.8725  
-97.28055556  
-98.74083333  
-98.82277778  
-97.34805556  
-97.2025  
-97.30166667  
-97.26027778  
-97.00666667  
-98.72638889  
-98.74555556  
-97.06944444  
-98.91472222  
-97.45055556  
-97.19722222  
-97.28055556  
-97.1275

-98.69166667  
-97.31916667  
-98.88333333  
-98.77861111  
-98.87083333  
-98.80638889  
-96.28208333  
-97.99861111  
-104  
-107.68333333  
-97.39777778  
-99.011  
-102.4391306  
-99.69166944  
-98.52612778  
-98.42830833  
-99.68333333  
-103.4216667  
-101.9400611  
-98.16278056  
-98.88528056  
-97.13028056  
-101.97  
-100.3616667  
-96.52083333  
-102.82833333  
-97.26333333  
-97.09  
-104.1516667  
-103.22333333  
-97.07861111  
-101.28333333  
-102.9816667  
-102.60833333  
-97.115  
-97.615  
-97.36  
-103.4827778  
-98.11833333  
-91.91944444  
-103.345  
-96.32  
-102.35833333  
-107.9166667  
-97.26361111

-100.33  
-97.04666667  
-101.5858333  
-100.0566667  
-99.03166667  
-98.45  
-100.1933333  
-99.94444444  
-100.745  
-98.24333333  
-107.0736111  
-97.56666667  
-109.838607  
-96.35583333  
-96.28916667  
-96.45583333  
-96.8725  
-96.7225  
-115.3666667  
-107.8366667  
-113.39  
-113.88  
-113.39  
-113.88  
-112.9225  
-115.542808  
-113.9316667  
-115.507649  
-115.4  
-115.432658  
-98.074  
-99.85833333  
-99.7325  
-98.25805556  
-103.34  
-107.77545  
-104.644855  
-99.271719  
-100.297466  
-115.44  
-114.8069444  
-108.0416667  
-108.0416667  
-100.97  
-115.3891667

-115.3166667  
-97.155054  
-101.955  
-97.27965833  
-106.4777778  
-102.0766667  
-99.78916667  
-97.26027778  
-97.83222222  
-96.47693889  
-98.712789  
-96.938667  
-97.417453  
-90.96817  
-99.429681  
-96.389837  
-91.83916667  
-88.307335  
-90.88916667  
-103.685  
-94.98916667  
-88.62888889  
-87.51277778  
-111.850457  
-99.829525  
-100.933205  
-99.724251  
-102.819641  
-96.490769  
-115.921199  
-105.814662  
-100.899933  
-101.0442  
-101.833411  
-97.463967  
-99.189045  
-97.783673  
-99.60583333  
-96.7575  
-99.48916667  
-100.4058333  
-100.1558333  
-97.73916667  
-98.28166667  
-97.19



-97.25583333  
-96.949655  
-98.80638889  
-99.98053333  
-99.05618333  
-101.3833333  
-100.77  
-98.52612778  
-111.4  
-106.4077167  
-91.3686  
-96.53636667  
-103.437875  
-107.0730556  
-96.11888889  
-101.5858333  
-97.285  
-102.9833333  
-88.51944444  
-111.4  
-92.625  
-108.3333  
-103  
-104.6666667  
-100.03333  
-100.36666  
-99.99  
-97.685  
-100.98  
-101.9075  
-99.84833333  
-100.4066667  
-103.105  
-97.43333  
-99.544673  
-102.5127778  
-103.1225  
-92.60614  
-98.99111111  
-99.043487  
-98.99111111  
-96.15918  
-99  
-97.02972222  
-97.03166667

-98.05583333  
-98.16  
-100.8055556  
-95.80583333  
-97.18166667  
-98.9  
-98.86666667  
-96.83916667  
-99.10583333  
-103.0283333  
-102.02  
-100.6166667  
-103.85  
-100.3833333  
-101.775  
-93.57  
-96.8225  
-96.312988  
-91.88916667  
-104.62  
-87.471755  
-101.3791583  
-88.142516  
-89.70972222  
-89.78888889  
-89.07333333  
-107.3891667  
-106.1083333  
-107.5194389  
-102.5958306  
-103.6305556  
-103.105  
-102.6216667  
-102.745  
-107.2166667  
-108.4455306  
-107.0819444  
-109.1944444  
-97.011577  
-103.0635472  
-102.3761111  
-101.525  
-97.10583333  
-96.895  
-96.769433

-98.13916667  
-92.73916667  
-96.20583333  
-103.7494444  
-98.73  
-98.73972222  
-97.40666667  
-97.06944444  
-98.75277778  
-97.17861111  
-96.45  
-99.57780278  
-105.2619611  
-104.4666667  
-98.63  
-103.7162  
-98.77  
-100.545  
-96.52083333  
-101.275  
-98.02  
-98.984197  
-96.891394  
-98.99825833  
-98.082885  
-96.89638889  
-101.7225  
-99.69166944  
-99.65166667  
-97.516936  
-96.30583333  
-98.572501  
-96.938667  
-95.01388  
-101.907671  
-97.3025  
-97.42777778  
-98.561874  
-98.73  
-98.90028056  
-100.39  
-96.651417  
-96.938667  
-96.938667  
-97.164429

-98.58333333  
-100.8666667  
-99.810537  
-100.618387  
-97.473201  
-97.43333333  
-96.1725  
-88.37833333  
-91.70722222  
-88.176983  
-89.61  
-102.497843  
-99.19973  
-98.764798  
-98.18278056  
-99.79055556  
-99.300381  
-98.982744  
-98.16  
-98.980719  
-97.5333  
-99.250228  
-99.189115  
-116.7333333  
-115.1058333  
-111.920772  
-115.7166667  
-116  
-115.3333333  
-115.1333333  
-111.85  
-111.9708333  
-111.5994972  
-114.288159  
-112.25  
-111.5791667  
-113.5013889  
-115.4833333  
-118.270847  
-96.9917  
-96.64488  
-93.66305833  
-93.46949722  
-99.133316  
-98.884492

-97.91990833  
-98.78277778  
-97.98972222  
-96.387163  
-96.6833  
-93.15972222  
-92.60666667  
-99.87  
-103.695  
-103.6725  
-99.84416667  
-98.13138889  
-100.661397  
-105.138067  
-99.635336  
-99.9  
-103.930423  
-97.090339  
-96.64379  
-87.63089444  
-89.88055556  
-90.02756111  
-100.3994389  
-101.2125  
-98.99111111  
-89.83333333  
-93.11083333  
-87.58916667  
-88.35583333  
-95.028104  
-102.4891667  
-90.43916667  
-88.307335  
-93.51189722  
-102.57  
-103.1  
-103.105  
-98.98333333  
-88.08333333  
-90.11666667  
-89.68638889  
-87.825  
-88.04444444  
-96.393122  
-94.95138889

-96.834471  
-99.97166667  
-98.97583056  
-98.525525  
-95.86666667  
-98.52666667  
-96.753573  
-95.30583333  
-91.05583333  
-100.942609  
-96.856106  
-96.83027778  
-95.71666667  
-95.79333333  
-104.7582444  
-99.95222778  
-99.97166667  
-103.9680556  
-96.72138889  
-98.74444444  
-97.30805556  
-97.13806111  
-103.2333333  
-99.83874167  
-99.86834722  
-100.77  
-100.5716667  
-107.6725  
-97.65333056  
-102.684275  
-100.422675  
-102.9783333  
-98.73166667  
-97.30805556  
-103.25  
-106.9891667  
-108.8916667  
-103.893794  
-103.8166667  
-104.9433333  
-96.80583333  
-96.87138889  
-99.88916667  
-98.74861111  
-98.84583056

-97.37166667  
-98.81194444  
-95.92  
-91.57527778  
-90.26361111  
-96.75583333  
-95.48472222  
-90.28833333  
-97.015  
-98.49916667  
-98.46237222  
-99.66128  
-99.71666667  
-96.56666667  
-98.23888889  
-100.0913889  
-101.5706611  
-98.98333333  
-96.31666667  
-99.31333333  
-96.938667  
-96.835495  
-96.981799  
-98.85583333  
-98.78916667  
-95.725  
-98.35436944  
-107.3028361  
-107.5194389  
-99.88333333  
-98.5167  
-97.26833333  
-103.3566667  
-98.13166667  
-103.1  
-99.08  
-91.33333333  
-100.6225  
-97.25583333  
-97.03166667  
-97.20942  
-98.36666667  
-102.4397222  
-99.35833333  
-101.33333333

-96.28916667  
-96.4225  
-99.5  
-92.63  
-104.7166667  
-102.2725  
-104.64  
-103.6725  
-105.8583333  
-100.654491  
-96.89638889  
-95.46437778  
-98.16  
-100.2183333  
-91.28916667  
-98.86222222  
-95.44  
-101.140461  
-96.28208333  
-96.14647778  
-96.07083333  
-96.21333333  
-97.55  
-98.3333  
-100.0764  
-92.545114  
-96.685456  
-96.41972222  
-97.26916667  
-97.32833333  
-98.15  
-98.7  
-100.3991667  
-103.6558333  
-97.00166667  
-97.11833333  
-99.8  
-99.87  
-97.50583333  
-104.0297194  
-102.6401917  
-103.4066667  
-102.5  
-95.26921667  
-98.90472222



-103.7105556  
-102.2225  
-100.4725  
-97.28916667  
-99.80583333  
-98.70777778  
-98.74555556  
-98.75  
-99.98445278  
-101.4  
-98.77  
-95.49129167  
-99.39166667  
-103.4067333  
-103.7263889  
-104.333333  
-101.610395  
-97.396917  
-99.652466  
-95.495  
-103.5  
-103.7833333  
-103.4408333  
-98.91666667  
-98.9  
-97.10583333  
-97.00583333  
-98.05583333  
-99.33916667  
-97.20083333  
-97.41083333  
-96.33666667  
-102.4083333  
-90.01666667  
-97.30691667  
-99.93333333  
-100.965  
-100.020188  
-96.855831  
-93.12444444  
-91.70583333  
-91.21833333  
-93.31666667  
-92.473  
-93.6

-93.211  
-96.961478  
-100.95  
-102.775  
-99.46075  
-98.14630556  
-98.21221944  
-98.941711  
-99.24011111  
-99.81583056  
-98.81833333  
-96.663414  
-96.5225  
-96.4225  
-98.10043611  
-97.41333333  
-99.095  
-98.86222222  
-99.31  
-96.32  
-98.42833333  
-100.3983333  
-97.2625  
-96.663566  
-96.86278056  
-91.76145833  
-98.10113333  
-95.77778056  
-107.3299694  
-100.3927861  
-92.51  
-97.233333  
-101.4833333  
-98.00611111  
-95.0225  
-98.25833333  
-99.296193  
-91.71555556  
-91.62156944  
-99.67748056  
-98.08  
-103.16  
-97.129535  
-96.949122  
-100.8666667

-92.19131  
-101.9058333  
-96.975729  
-96.848826  
-96.898547  
-96.15583333  
-98.23916667  
-91.54462778  
-95.5  
-98.35656389  
-101.9303056  
-100.2766667  
-98.125  
-96.6225  
-96.10583333  
-96.80583333  
-96.3725  
-95.0225  
-96.89638889  
-96.20583333  
-95.86583056  
-96.36833333  
-99.14666667  
-99.65166667  
-103.167795  
-97.5333  
-96.47778  
-99.3  
-97.21667  
-104.26389  
-98.652  
-100.433  
-105.72  
-98.52666667  
-99.51666  
-98.84583333  
-104.343729  
-95.68916667  
-98.86444444  
-92.678268  
-97.3333  
-100.3466667  
-98.33333333  
-102.5058333  
-103.7361111

-97  
-99.55583333  
-97.08916667  
-97.94416667  
-96.738697  
-101.75583333  
-98.32778333  
-95.0675  
-98.48083056  
-99.83333333  
-99.16166667  
-98.81861111  
-91.05833333  
-98.86666667  
-96.2725  
-99.46075  
-97.1981  
-96.31222  
-110.95  
-98.983  
-101.15  
-100.15  
-104.264  
-98.11389  
-98.888  
-101.7333333  
-100.267  
-109.967  
-104.26944  
-109.108  
-109.008  
-108.9264  
-96.462119  
-92.5  
-99.733333  
-99.99  
-102.4452778  
-101.5244444  
-92.116  
-99.32  
-97.247225  
-99.98  
-99.25  
-99.88166667  
-92.7779

-99.18333  
-103.15  
-97.2264  
-97.48916667  
-96.848826  
-96.72722222  
-96.876146  
-96.89638889  
-102.1391667  
-100.3558333  
-102.7725  
-98.74555556  
-97.14583333  
-98.77861111  
-108.7472222  
-98.47523056  
-107.5194444  
-104.6793944  
-103.7163778  
-103.1026111  
-97.47318056  
-98.91638889  
-109.794785  
-106.3666667  
-99.15583333  
-93.35444444  
-98.36666667  
-103.1777778  
-95.6725  
-93.66333333  
-92.84  
-103.7  
-99.03333  
-99.81666  
-103.36666  
-99.1825  
-101.53333  
-99.15  
-104.93333  
-92.77  
-99.15  
-101.97  
-99.1825  
-102.78  
-94.03

-96.43333  
-99.9  
-99.333  
-100.985  
-103.507  
-97.544  
-100.154  
-97.31667  
-103.75  
-101.8  
-109.983  
-99.73  
-100.5214722  
-108.75  
-108.66667  
-99.083  
-103.245  
-100.271732  
-114.783867  
-99.23  
-102.058  
-101.602  
-96.4  
-96.383  
-102.258  
-101.528  
-98.732  
-99.267  
-99.893  
-99.083  
-104.9944444  
-97.163  
-92.543  
-98.67  
-100.152  
-99.321  
-101.279  
-96.818  
-104.752  
-103.2  
-99.504  
-104.78  
-105.962  
-107.635  
-96.48333

-92.183  
-102.25  
-99.318  
-103.37  
-99.15  
-106.379  
-105.81667  
-94.19167  
-93.01  
-99.899329  
-99.775875  
-92.97  
-97.133  
-96.31083333  
-99.083  
-99.2  
-97.167  
-103.437  
-102.03  
-104.495  
-104.33  
-105.837  
-105.6  
-108.723  
-101.194  
-102.414  
-104.3  
-97.151  
-99.267  
-98.68166667  
-99.2172222  
-97.9517  
-92.339  
-99.32  
-99.14833  
-92.76  
-92.57  
-98.05  
-102.072  
-97.13  
-101.457  
-99.117  
-99.74194444  
-95.06667  
-103.580249

-89.23444  
-96.5  
-92.82  
-99.53  
-103.636546  
-101.8  
-99.098  
-98.87  
-97.277  
-97.430693  
-100.933  
-99.238  
-99.46666667  
-99.742  
-107.635  
-96.10139  
-92.09  
-96.09306  
-94.031  
-99.5  
-93.393  
-91.83  
-103.15  
-98.983  
-94.34833  
-104.313  
-97.287  
-88.93  
-105.05  
-99.067  
-99.473  
-110.05  
-108.207  
-108.767  
-95.332  
-98.95  
-89.52833  
-101.415  
-104.73333  
-94.117  
-96.872  
-94.133  
-93  
-105.3  
-108.8



-93.717  
-96.45  
-103.283  
-99.27  
-96.13333  
-100.05  
-99.14  
-98.11389  
-101.112  
-99.632  
-100.38333  
-99.217  
-99.74194444  
-108.28333  
-95.5833  
-93.5  
-99.3  
-98.1125  
-104.597  
-100.7  
-107.5  
-99.275  
-102.5666667  
-98  
-99.191  
-96.03  
-97.5667  
-96.31083333  
-100.27  
-102.264  
-99.08  
-99.267  
-97.21667  
-110.033  
-99.74194444  
-109.025  
-108.20833  
-96.284583  
-106  
-105.77  
-97.067  
-99.154  
-99.3  
-104.63379  
-106

-96.06667  
-96.07  
-99.23  
-99.217  
-99.37  
-91.9  
-108.258498  
-96.4  
-93.404  
-96.94583  
-97.41667  
-99.203  
-99.08  
-100.39167  
-96.10167  
-94.5  
-93.612  
-89.41028  
-97.51667  
-99.053  
-100.5  
-98.715  
-94.683  
-94.517  
-99.48  
-101.133  
-99.258  
-99.388  
-98.52  
-104.05  
-108.88722  
-98.67  
-97.87  
-97.003  
-97.2  
-101.447  
-100.152  
-97.367  
-102.718  
-99.24  
-98.74  
-98.693  
-103.172  
-100.798  
-100.033

-103.222  
-102.228  
-105.802  
-104.133  
-103.78  
-108.274  
-99.239  
-100.453  
-99.237  
-116.667  
-100.084  
-99.308  
-104.6  
-102  
-107.5688333  
-100.81  
-100.17  
-99.1  
-103.465  
-98.517  
-99.75  
-105.75  
-107.3543333  
-92.5  
-99.19  
-102  
-103.392  
-104.593  
-103.222  
-102.343  
-99.74194444  
-100  
-99.08  
-100.718  
-99.65055556  
-100.13  
-98.517  
-102  
-99.1  
-99.645  
-99.88  
-99.23  
-104.325  
-102.475  
-100.827

-103.417  
-104.265  
-104.268  
-97.97722222  
-103.34  
-103.018  
-100.04  
-104.95  
-99.55  
-108.713  
-108.70278  
-116.13  
-116.47  
-100.05  
-104.786  
-104.133  
-105.32037  
-105.3  
-108.65  
-115.25  
-115.883  
-116.75  
-109.95  
-89.4894444  
-93.4844444  
-96.35  
-87.185  
-92.96  
-95.35  
-87.6313889  
-103.69  
-98.63  
-103.34  
-99.87  
-100.94  
-99.23  
-104.46  
-100.16  
-99.5  
-105.86  
-99.15  
-97.14  
-103.7833333  
-103.6666667  
-103.9333333

-101.25  
-104.0483333  
-104.4341667  
-103.2702778  
-104.2833333  
-103.4666667  
-103.4666667  
-100.45  
-101.975  
-99.16666667  
-104.92  
-104.9  
-97.90888889  
-110.2833333  
-110.2166667  
-100.58  
-100.8983333  
-99.065  
-99.925  
-97.787  
-97.78667  
-109.65028  
-102.657  
-102.65667  
-99.025  
-99.025276  
-100.70417  
-100.704  
-99.867  
-99.86833  
-99.868  
-100.05  
-100.05  
-98.096664  
-98.097  
-103.085  
-99.533  
-99.53333  
-99.48861  
-99.243614  
-99.875  
-99.875  
-99.883  
-109.988  
-99.682

-99.68166  
-97.62  
-101.043  
-101.043335  
-98.8725  
-99.07278  
-99.068054  
-103.34  
-103.16  
-99.462  
-99.46167  
-101.67667  
-101.677  
-100.169  
-100.186  
-100.762  
-100.761665  
-103.48  
-105.802  
-105.836  
-99.18  
-99.155  
-99.155  
-99.155  
-99.19583  
-99.19361  
-102.394  
-99.23  
-99.23  
-99.267  
-99.233  
-99.267  
-99.25  
-106.835  
-106.49834  
-106.498  
-100.35167  
-100.352  
-104.85  
-104.833  
-105.03  
-104.994  
-105.01  
-104.67  
-104.982

-104.98167  
-99.10528  
-99.65361  
-99.654  
-101.683  
-101.707  
-101.706665  
-101.736664  
-101.737  
-99.94  
-102.885  
-102.391  
-102.348  
-99.772  
-99.77167  
-103.465  
-103.465  
-101.442  
-101.18833  
-99.12222  
-99.129166  
-101.455  
-101.428  
-101.42834  
-101.42834  
-99.20333  
-99.203  
-99.21528  
-103.2  
-103.2  
-99.41139  
-98.888054  
-99.248  
-99.24778  
-98.775  
-98.775  
-103.139  
-103.124  
-103.101  
-102.71833  
-102.718  
-102.718  
-99.17333  
-99.173  
-103.417

-103.467  
-103.376  
-103.43667  
-103.437  
-103.437  
-103.23  
-103.232  
-103.242  
-103.237  
-103.233  
-103.222  
-103.251  
-103.212  
-98.28  
-101.817  
-101.935  
-101.935  
-101.68  
-108.274  
-99.248886  
-97.267  
-104.002  
-103.01833  
-104.632  
-104.63167  
-104.617  
-96.3  
-96.29  
-98.6975  
-98.697  
-101.10667  
-101.279  
-101.255  
-101.515  
-108.542  
-103.168  
-103.281  
-99.23805  
-104.7  
-99.31416  
-97.2  
-104.317  
-99.25  
-93.39  
-98.73333



-98.788  
-98.708  
-103.28333  
-103.283  
-101.6  
-101.52167  
-99.813  
-99.81333  
-99.633  
-101.476  
-105.31333  
-105.033  
-100.39167  
-100.392  
-109.12972  
-103.236  
-100.867  
-100.751  
-101.48972  
-101.49  
-101.297  
-101.29667  
-101.023  
-101.02333  
-103.71  
-106.433  
-102.41417  
-100.385  
-100.385  
-100.388  
-96.965  
-97.003  
-99.983  
-100.508  
-100.49389  
-100.44028  
-100.44  
-101.046  
-100.978615  
-100.979  
-103.933  
-97.061386  
-97.683  
-97.645  
-110.614

-110.38279  
-110.36667  
-97.02  
-97.02  
-97.1  
-105.883  
-105.89167  
-105.892  
-101.471664  
-101.472  
-103.767  
-104.1  
-104.197  
-104.179  
-104.125  
-104.3  
-104.3  
-103.923  
-103.92306  
-104.1  
-102.25667  
-102.346  
-103.75  
-103.758  
-103.30666  
-103.307  
-99.67  
-100.07  
-99.574  
-98.768  
-98.55  
-98.55417  
-98.549446  
-98.58139  
-98.83583  
-99.30389  
-99.24084  
-99.25472  
-99.25472  
-99.042  
-98.86833  
-98.918335  
-98.8175  
-98.833336  
-98.833336

-98.967  
-98.99333  
-103.561  
-99.14  
-99.18  
-99.2  
-99.14833  
-99.22139  
    -99.056  
    -99.054  
-102.013336  
-98.95944  
-99.92889  
-99.929  
-103.55  
-103.55  
-99.17  
-99.20194  
-107.935  
-102.094  
-103.983  
-103.98333  
-100.2  
-100.262  
-100.261665  
-96.801  
-102.843  
-99.135  
-109.033  
-109.033  
-108.933  
-108.908  
-103.483  
-100.603  
-100.614  
-97.6  
-97.6  
-98.652  
-98.65889  
-98.74555  
-97.06  
-100.827  
-100.82694  
-100.47  
-97.84

-97.45  
-100.51  
-97.7  
-98.64  
-99.23  
-98.74  
-104.07  
-101.17  
-104.99  
-104.99  
-104.9  
-105.0  
-108.71667  
-108.717  
-108.717  
-108.68889  
-108.689  
-108.689  
-109.025  
-108.911835  
-106.47  
-107.684  
-107.684  
-108.33  
-105.4366667  
-102.4441667  
-99.55416667  
-99.54  
-97.51666667  
-94.33666667  
-97.6  
-99.76666667  
-116.6  
-102.04444  
-101.38  
-99.616113  
-98.435925  
-98.119575  
-98.467919  
-96.4  
-93.47  
-96.784  
-99.095  
-99.47  
-99.2

-92.3419444  
-96.59  
-93.1741667  
-92.87  
-99.491  
-102.85222  
-100  
-105.95  
-100.05  
-100.36666  
-99.155  
-92.4436111  
-99.61  
-99.09  
-99.733333  
-100.61  
-105.83  
-96.94333  
-103.283  
-104.203  
-100.588  
-99.564  
-98.706  
-99  
-108.2222  
-92.8344444  
-99.46666  
-96.4  
-96.784  
-99.095  
-99.2  
-99.473  
-97.062495  
-100.15  
-97.1  
-102.045  
-97.838  
-103.84  
-99  
-98.687  
-92.231641  
-92.56  
-99.84972  
-103.5666667  
-100.466667

-101.86666  
-99.28  
-97.6111111  
-96.79  
-97.01667  
-99.98889  
-99.564  
-104.133  
-103.84  
-95.878  
-99.76611  
-99.7525  
-98.67028  
-99.238  
-99.32  
-102.067  
-102.052  
-100.04  
-103.39  
-103.34  
-103.43  
-106.427  
-105.84  
-106.379  
-99.982  
-103.35355  
-100.368789  
-95.850751  
-99.467627  
-103.577801  
-103.445626  
-99.105887  
-99.475562  
-103.396959  
-99.680637  
-67.62  
-64.435  
-68.66  
-82.63  
-84.224722  
-84.092222  
-86.37  
-86.33  
-89.29  
-86.35

-86.03  
-89.68  
-88.18  
-92.092  
-96.53778  
-96.30028  
-94.13333  
-94.183  
-92.848  
-92.04861  
-92.374  
-101.163  
-99.35  
-99.267  
-102.023  
-102.052  
-102.43  
-101.267  
-101.68  
-101.307  
-101.255  
-101.655  
-99.185  
-99.181  
-99.78  
-96.75  
-103.6667  
-104.896  
-103.223  
-103.417  
-105.355  
-100.05187  
-101.298283  
-99.921286  
-96.51755  
-99.055565  
-98.841565  
-86.500588  
-105.287941  
-90.246852  
-104.712047  
-101.46262  
-86.17851  
-104.968227  
-74.205982

-89.289971  
-93.057891  
-98.591184  
-101.601651  
-103.461862  
-91.774219  
-100.689855  
-87.079062  
-101.0167  
-97.01317  
-101.607413  
-99.534082  
-102.073261  
-96.877216  
-92.459411  
-99.176734  
-91.995548  
-67.588536  
-96.696739  
-98.721691  
-92.107001  
-97.146132  
-99.189866  
-99.171137  
-76.569696  
-103.226654  
-103.618735  
-87.34565  
-87.55248  
-102.359006  
-100.051994  
-78.411542  
-88.450397  
-98.356617  
-100.359893  
-104.123049  
-103.470023  
-99.255351  
-101.092731  
-98.746267  
-99.197099  
-99.747756  
-99.100067  
-95.01556  
-99.717



-99.7525  
-99.35  
-99.726  
-102.08056  
-100.47  
-99.25  
-99.1  
-102.052  
-100.04  
-99.78  
-103.467  
-103.34  
-103.433  
-109.887  
-104.311162  
-104.122202  
-103.569948  
-106.229522  
-106.495573  
-104.881372  
-103.585396  
-104.830641  
-103.530054  
-102.545909  
-97.26666  
-104.697  
-105.06444  
-103.78  
-104.632  
-105.843  
-104.19722  
-102  
-100.713804  
-104.917074  
-104.668757  
-99.618623  
-100.196222  
-100.081085  
-100.343447  
-99.723454  
-101.457573  
-102.009718  
-97.288224  
-96.959414  
-99.112429

-103.326722  
-104.89816  
-99.331387  
-96.95  
-98.67  
-101.191  
-100.132  
-99.345  
-99.233  
-99.53972  
-98.967  
-102.058  
-101.19  
-100.077  
-104.896  
-112.238  
-108.6767  
-108.717  
-108.75  
-108.66667  
-109.3167  
-108.5  
-108.7233  
-99.995558  
-96.734016  
-96.722173  
-96.08944  
-96.7  
-96.856  
-99.875  
-99.893  
-99.6  
-99.23  
-99.9  
-105.3  
-103.59645  
-103.461662  
-103.334569  
-98.594791  
-99.668094  
-100.182937  
-103.020328  
-99.941205  
-104.488159  
-103.468054

-96.507  
-100.27  
-99.283  
-99.333  
-99.88  
-98.7  
-102.052  
-101.788  
-101.852  
-99.178  
-103.433  
-103.767  
-103.223  
-104.65  
-105.355  
-105.83  
-106.379  
-105.88333  
-99.5  
-102.071  
-100.04  
-99.093  
-99.117  
-97.57639  
-101.743  
-101.733  
-99.564  
-98.65  
-99.156  
-99.567  
-98.765204  
-98.767899  
-99.188136  
-100.059162  
-100.757252  
-99.287048  
-98.797447  
-101.254513  
-100.162134  
-99.967013  
-99.270328  
-99.154753  
-98.4833  
-97.247221  
-99.137153

-104.075577  
-100.104491  
-104.876002  
-99.088733  
-99.96639  
-99.2994  
-97.733965  
-98.33358  
-96.690089  
-99.295836  
-99.345248  
-99.565406  
-97.356722  
-102.25  
-92.04  
-99.453  
-99.567  
-99.6  
-98.167  
-97.88333  
-97.68  
-96.94778  
-99.67  
-99.117  
-103.788  
-100.322  
-96.667  
-96.747  
-96.698  
-99.517  
-99.879  
-101.975542  
-96.735001  
-100.046857  
-103.858096  
-103.438  
-103.470911  
-103.18676  
-102.167532  
-101.157112  
-99.282477  
-96.734016  
-96.438664  
-103.335045  
-96.53333

-99.76444  
-97.85  
-96.70833  
-99.238  
-99.333  
-103.083  
-102.005  
-101.788  
-100.04  
-99.143  
-103.22278  
-100.295747  
-92.3238  
-103.142732  
-101.62299  
-99.32171  
-107.572896  
-99.969329  
-80.97  
-83.65  
-86.33  
-89.29  
-96.4  
-98.05  
-94.6  
-101.653  
-100.15  
-99.3  
-99.6  
-99.309  
-99  
-97.087  
-92.41056  
-103.37  
-102.05  
-102.217  
-101.26194  
-101.59797  
-100.115913  
-100.046202  
-96.983  
-88.09  
-103.432  
-104.956  
-99.32

-104.33  
-110.085  
-109.933  
-105.824  
-111.458  
-113.103  
-86.698769  
-90.297544  
-91.471798  
-88.710645  
-83.011631  
-83.618791  
-83.155096  
-90.344534  
-90.120779  
-79.556691  
-87.846817  
-75.69303  
-89.549727  
-89.190372  
-87.850111  
-90.111912  
-79.396219  
-90.675732  
-91.850928  
-90.331406  
-87.80512  
-88.046014  
-77.308865  
-78.464286  
-87.802078  
-93.078487  
-91.701553  
-99.674945  
-99.332736  
-99.141416  
-94.833736  
-98.641754  
-97.956876  
-97.844523  
-100.034425  
-99.260629  
-95.35876  
-97.712482  
-96.967043

-93.719851  
-92.013486  
-92.957523  
-98.84784  
-100.128028  
-99.615372  
-98.707798  
-98.623208  
-105.250031  
-103.672485  
-103.381395  
-99.307909  
-99.344582  
-102.300418  
-98.68333333  
-95.034248  
-96.259873  
-96.491562  
-97.752339  
-106.372354  
-97.956876  
-79.561436  
-85.93333  
-99.792682  
-88.395509  
-86.872461  
-88.049065  
-88.872254  
-88.879684  
-99.304681  
-92.82277  
-99.083  
-90.37  
-97.115074  
-95.065177  
-96.963359  
-86.184926  
-86.199639  
-79.563031  
-90.675732  
-85.93333  
-85.52  
-99.67  
-79.115366  
-81.0176

-87.83  
-89.579703  
-86.03333333  
-83.333334  
-83.342222  
-83.481944  
-82.62  
-80.86  
-79.53  
-84.25  
-84.186111  
-82.96797  
-79.56  
-85.502778  
-85.611389  
-84.83  
-84.44  
-86.31  
-85.59  
-85.9  
-86.45  
-84.72  
-87.83  
-86.2  
-96.467  
-92.792  
-92.581  
-92.192  
-91.989  
-90.25  
-95.067  
-96.01556  
-94.11666667  
-93.888  
-92.3  
-92.52  
-92.898  
-91.66667  
-91.03333333  
-89.03  
-89.89  
-99.683  
-97.83333333  
-96.5  
-94.6



-93.05  
-93.58333333  
-92.116  
-92.97  
-92.45  
-91.133  
-91.8  
-89.40472  
-88.88333333  
-88.5  
-103.4  
-101.605  
-99.67  
-99.31666667  
-99.6  
-97.087  
-97.011  
-96.00028  
-95.083  
-95.377  
-95.07  
-94.885  
-94.34833  
-93.23333333  
-92.433  
-92.58333333  
-92.38444  
-92.091  
-91.052  
-90.78333333  
-89.45  
-89.28333333  
-88.02  
-104.437  
-98.88333333  
-97.166  
-97.7  
-97.42  
-96.8  
-96.25  
-96.592  
-96.764  
-96.38333333  
-96.823  
-88.03

-105.25  
-105.315  
-98.267  
-98.21666667  
-98.22  
-86.89205  
-103.172  
-100.0166667  
-99.26666667  
-99.329  
-99.55  
-97.75  
-104.67  
-99.4  
-97.8  
-97.861  
-99.495  
-108.6667  
-96.442  
-96.592  
-99.55823  
-99.120221  
-96.735001  
-104.738307  
-101.455883  
-99.444658  
-99.557286  
-96.9798  
-103.757144  
-103.565308  
-99.936259  
-100.327269  
-103.021292  
-99.19  
-99.558854  
-104.566347  
-86.35  
-90.82  
-86.6  
-90.02  
-89.68  
-87.1  
-96.06611  
-94.183  
-97.293

-101.808  
-100.017  
-100.151  
-99.333  
-99.32  
-99.965  
-99.32  
-97.32  
-101.6  
-100.462  
-100.062  
-103.289  
-103.438  
-103.537  
-103.222  
-99.504  
-104.517  
-106.427  
-106.379  
-107.633  
-108.7  
-108.717  
-99.19  
-96.302787  
-99.185  
-99.19  
-99.155  
-102  
-92.056  
-91.069  
-91.45  
-91.08  
-90.816  
-92.315  
-92.16666667  
-94.683  
-95.967  
-102.059338  
-101.3144  
-96.3  
-96.003  
-100.658  
-100.272  
-98.817  
-98.88333

-92.3419444  
-100.03333  
-91.49333  
-91.44944  
-100.42  
-105.014  
-105.034  
-104.922  
-103.6333333  
-103.3418027  
-104.98027  
-104.75  
-101.03  
-100.43  
-93.1247223  
-95.01555  
-90.72  
-103.228773  
-96.941834  
-96.628601  
-96.866632  
-100.92  
-99.4247223  
-100.46  
-99.1388889  
-98  
-97.167  
-96.794  
-96.717  
-97.25  
-98.9  
-101.6  
-99.67  
-99.753778  
-102.833  
-100.847  
-99.342  
-97.787  
-100.995  
-102.65  
-105.16  
-104.76  
-105.78333  
-98.8294445  
-98.8763889

-100.1168334  
-104.07  
-104.1  
-102.391  
-103.767  
-103.392  
-99.23  
-104.203  
-99.884  
-96.317  
-99.177  
-92.4666667  
-96.61  
-100.723  
-98.68  
-99.502  
-99.152  
-95.865246  
-97.85  
-96.601009  
-99.078502  
-100.042  
-98.962  
-104.822  
-96.505  
-94.63  
-103.767  
-97  
-104.6  
-104.65  
-100.148  
-90.2166667  
-89.73  
-89.9  
-87.71  
-88.48  
-88.618  
-88.921  
-99.639  
-99.639  
-103.075639  
-99.315166  
-99.2516667  
-99.9905555  
-99.0186111

-103.01  
-102.58  
-98.7772223  
-99.6552778  
-100.36  
-98.8180556  
-100.1180556  
-101.3791667  
-100.62  
-104.33333  
-99.88  
-99.91  
-97.82  
-108.594  
-96.522668  
-96.76472  
-99.1513889  
-99.1980555  
-99.1833333  
-99.9  
-98.83  
-101.3313889  
-97.68  
-100.61  
-97.05  
-96.2487  
-103.6833333  
-104.3  
-104.91  
-104.95722  
-103.768  
-103.293  
-101.593  
-104.018  
-103.2  
-104.98  
-101.143  
-108.9166667  
-98.9088889  
-99.23  
-99.7333333  
-97.458  
-99.947  
-99.095  
-97.805

-99.117  
-98.76  
-99.1  
-97.75  
-97.793  
-103.76  
-104.082  
-104.563  
-93.0897222  
-93.0911111  
-99.45  
-96.6861111  
-97.85  
-99.65  
-100.033  
-96.95  
-99.965  
-99.537  
-101.461  
-98.984  
-96.95  
-94.885  
-97.674  
-92.08  
-104.46666  
-104.46666  
-109.2727778  
-104.517  
-104.833  
-107.563  
-106.526  
-108.712  
-104.43  
-109.34  
-109.903  
-109.367  
-99.9602778  
-101.19  
-102.35  
-99.733333  
-96.616667  
-104.23  
-104.245  
-101.713  
-101.817

-100.748  
-102.332  
-104.933  
-91.97  
-93.45  
-100.15  
-93.463  
-101.46  
-101.283  
-101.605  
-97.061  
-96.925  
-98.227  
-92.63  
-104.99  
-105.26  
-99.17  
-96.51  
-99.98  
-98.67  
-100.03  
-96.407179  
-97.719  
-97.563  
-99.517  
-100.15  
-99.94  
-103.008  
-103.018  
-97.08998  
-101.3583333  
-97.19833  
-96.36  
-97.576  
-101.428  
-96.712  
-96.284  
-96.363  
-97  
-97.881  
-101.148  
-101.395  
-101.515  
-101.579  
-97.267



-97.35  
-96.667  
-97.4028  
-97.31562  
-107.638  
-107.615  
-107.128  
-104.139  
-104.238  
-104.143  
-99.1202778  
-98.48  
-103.35  
-100.03305  
-100.45  
-99.3483333  
-100.1140556  
-103.22  
-101.3583333  
-97.87027  
-105.45  
-99.156  
-99.238  
-99.002  
-99.383  
-90.167  
-88.395  
-95.166  
-96.733  
-103.775221  
-101.223  
-103.346  
-101.152  
-104.353  
-104.408  
-103.346  
-104.353  
-104.407  
-103.358  
-101.218  
-104.877  
-101.737  
-101.537  
-103.502  
-101.894

-102.043  
-102.083  
-102.001  
-99.028  
-102.728  
-102.024  
-101.935  
-102.001  
-102.576  
-104.776  
-103.5  
-100.955  
-104.99  
-104.76666  
-105  
-99.5  
-97.111378  
-97.064  
-104.638  
-103.617  
-104.976  
-103.897  
-104.101  
-103.936  
-103.823  
-103.626  
-104.007  
-102.573  
-104.633  
-102.847  
-104.633  
-102.079  
-99.233  
-104.903  
-104.833  
-104.33333  
-103.5246945  
-104.31  
-104.089  
-104.362  
-104.093  
-103.809  
-103.852  
-104.976  
-103.524

-103.723  
-104.333  
-103.183  
-103.918  
-103.626  
-104.85  
-104.78333  
-104.61666  
-104.001  
-105.029  
-101.22  
-103.98  
-104.783  
-104.6  
-102.718  
-104.895  
-99.5  
-103.3391666  
-102  
-106.99  
-108.3333  
-105.3  
-106.75  
-105  
-104.6666667  
-104.78  
-105.53333  
-100.8  
-99.1436111  
-100.28305  
-98.8480555  
-96.32  
-100.25  
-103.79  
-108.888  
-101.9  
-96.003  
-110.781  
-106.835  
-103.767  
-96.003  
-102.633  
-108.723  
-99.256  
-109.108

-104.87  
-100.2  
-108.008  
-104.75  
-104.975  
-99.268  
-100.067  
-104.9  
-98.95  
-108.689  
-104.15  
-104.333  
-101.73  
-104.24  
-96.32  
-98.717  
-104.77  
-104.24  
-98.902  
-103.046  
-108  
-108.33  
-99.23  
-102  
-92.4  
-91.83  
-91.75  
-89.453  
-95.04  
-94.383  
-94.6  
-88.57
